# Supplementary material for: High-Order Correlation Integration for Single-Cell or Bulk RNA-seq Data Analysis
Source: Front Genet. 2019 Apr 26;10:371. doi: 10.3389/fgene.2019.00371 (PMC6497731; doi:10.3389/fgene.2019.00371)
Supplement: Supplementary file 2 [file Table_2.XLSX]

## Sheet: gProfiler
1	11715100_AT	1.1	ENSG00000273983	HIST1H3G	histone cluster 1 H3 family member g [Source:HGNC Symbol;Acc:HGNC:4772]	AFFY_PRIMEVIEW
2	11715102_X_AT	2.1	ENSG00000273983	HIST1H3G	histone cluster 1 H3 family member g [Source:HGNC Symbol;Acc:HGNC:4772]	AFFY_PRIMEVIEW
3	11715105_AT	3.1	ENSG00000278505	C17ORF78	chromosome 17 open reading frame 78 [Source:HGNC Symbol;Acc:HGNC:26831]	AFFY_PRIMEVIEW
4	11715106_X_AT	4.1	ENSG00000271321	CTAGE6	CTAGE family member 6 [Source:HGNC Symbol;Acc:HGNC:28644]	AFFY_PRIMEVIEW
4	11715106_X_AT	4.2	ENSG00000271079	CTAGE15	CTAGE family member 15 [Source:HGNC Symbol;Acc:HGNC:37295]	AFFY_PRIMEVIEW
5	11715112_AT	5.1	ENSG00000178965	ERICH3	glutamate rich 3 [Source:HGNC Symbol;Acc:HGNC:25346]	AFFY_PRIMEVIEW
6	11715116_S_AT	6.1	ENSG00000276966	HIST1H4E	histone cluster 1 H4 family member e [Source:HGNC Symbol;Acc:HGNC:4790]	AFFY_PRIMEVIEW
7	11715124_S_AT	7.1	ENSG00000284583	MIR935	microRNA 935 [Source:HGNC Symbol;Acc:HGNC:33678]	AFFY_PRIMEVIEW
7	11715124_S_AT	7.2	ENSG00000142408	CACNG8	calcium voltage-gated channel auxiliary subunit gamma 8 [Source:HGNC Symbol;Acc:HGNC:13628]	AFFY_PRIMEVIEW
8	11715126_S_AT	8.1	ENSG00000233822	HIST1H2BN	histone cluster 1 H2B family member n [Source:HGNC Symbol;Acc:HGNC:4749]	AFFY_PRIMEVIEW
9	11715128_S_AT	9.1	ENSG00000276547	PCDHGB5	protocadherin gamma subfamily B, 5 [Source:HGNC Symbol;Acc:HGNC:8712]	AFFY_PRIMEVIEW
10	11715132_X_AT	10.1	ENSG00000275713	HIST1H2BH	histone cluster 1 H2B family member h [Source:HGNC Symbol;Acc:HGNC:4755]	AFFY_PRIMEVIEW
11	11715134_S_AT	11.1	ENSG00000180481	GLIPR1L2	GLIPR1 like 2 [Source:HGNC Symbol;Acc:HGNC:28592]	AFFY_PRIMEVIEW
12	11715146_X_AT	12.1	ENSG00000268447	SSX2B	SSX family member 2B [Source:HGNC Symbol;Acc:HGNC:22263]	AFFY_PRIMEVIEW
12	11715146_X_AT	12.2	ENSG00000187754	SSX7	SSX family member 7 [Source:HGNC Symbol;Acc:HGNC:19653]	AFFY_PRIMEVIEW
13	11715149_X_AT	13.1	ENSG00000184270	HIST2H2AB	histone cluster 2 H2A family member b [Source:HGNC Symbol;Acc:HGNC:20508]	AFFY_PRIMEVIEW
14	11715161_S_AT	14.1	ENSG00000187026	KRTAP21-2	keratin associated protein 21-2 [Source:HGNC Symbol;Acc:HGNC:18946]	AFFY_PRIMEVIEW
15	11715169_AT	15.1	ENSG00000090924	PLEKHG2	pleckstrin homology and RhoGEF domain containing G2 [Source:HGNC Symbol;Acc:HGNC:29515]	AFFY_PRIMEVIEW
16	11715174_S_AT	16.1	ENSG00000215455	KRTAP10-1	keratin associated protein 10-1 [Source:HGNC Symbol;Acc:HGNC:22966]	AFFY_PRIMEVIEW
17	11715175_X_AT	17.1	ENSG00000212935	KRTAP10-3	keratin associated protein 10-3 [Source:HGNC Symbol;Acc:HGNC:22968]	AFFY_PRIMEVIEW
18	11715176_AT	18.1	ENSG00000182134	TDRKH	tudor and KH domain containing [Source:HGNC Symbol;Acc:HGNC:11713]	AFFY_PRIMEVIEW
19	11715177_S_AT	19.1	ENSG00000182134	TDRKH	tudor and KH domain containing [Source:HGNC Symbol;Acc:HGNC:11713]	AFFY_PRIMEVIEW
20	11715178_S_AT	20.1	ENSG00000221938	OR2A14	olfactory receptor family 2 subfamily A member 14 [Source:HGNC Symbol;Acc:HGNC:15084]	AFFY_PRIMEVIEW
21	11715191_S_AT	21.1	ENSG00000188732	FAM221A	family with sequence similarity 221 member A [Source:HGNC Symbol;Acc:HGNC:27977]	AFFY_PRIMEVIEW
22	11715192_S_AT	22.1	ENSG00000188732	FAM221A	family with sequence similarity 221 member A [Source:HGNC Symbol;Acc:HGNC:27977]	AFFY_PRIMEVIEW
23	11715197_S_AT	23.1	ENSG00000171016	PYGO1	pygopus family PHD finger 1 [Source:HGNC Symbol;Acc:HGNC:30256]	AFFY_PRIMEVIEW
24	11715200_S_AT	24.1	ENSG00000280457	DUX4L2	double homeobox 4 like 2 [Source:HGNC Symbol;Acc:HGNC:37267]	AFFY_PRIMEVIEW
24	11715200_S_AT	24.2	ENSG00000279626	DUX4L28	double homeobox 4 like 28 [Source:HGNC Symbol;Acc:HGNC:51605]	AFFY_PRIMEVIEW
24	11715200_S_AT	24.3	ENSG00000258834	DUX4L4	double homeobox 4 like 4 [Source:HGNC Symbol;Acc:HGNC:38686]	AFFY_PRIMEVIEW
24	11715200_S_AT	24.4	ENSG00000280757	DUX4L1	double homeobox 4 like 1 [Source:HGNC Symbol;Acc:HGNC:3082]	AFFY_PRIMEVIEW
24	11715200_S_AT	24.5	ENSG00000280799	DUX4L5	double homeobox 4 like 5 [Source:HGNC Symbol;Acc:HGNC:38689]	AFFY_PRIMEVIEW
24	11715200_S_AT	24.6	ENSG00000278641	DUX4L15	double homeobox 4 like 15 [Source:HGNC Symbol;Acc:HGNC:38674]	AFFY_PRIMEVIEW
24	11715200_S_AT	24.7	ENSG00000276904	DUX4L14	double homeobox 4 like 14 [Source:HGNC Symbol;Acc:HGNC:38673]	AFFY_PRIMEVIEW
24	11715200_S_AT	24.8	ENSG00000278664	DUX4L10	double homeobox 4 like 10 [Source:HGNC Symbol;Acc:HGNC:31354]	AFFY_PRIMEVIEW
24	11715200_S_AT	24.9	ENSG00000274599	DUX4L24	double homeobox 4 like 24 [Source:HGNC Symbol;Acc:HGNC:50805]	AFFY_PRIMEVIEW
24	11715200_S_AT	24.1	ENSG00000276046	DUX4L13	double homeobox 4 like 13 [Source:HGNC Symbol;Acc:HGNC:38672]	AFFY_PRIMEVIEW
24	11715200_S_AT	24.11	ENSG00000275610	DUX4L21	double homeobox 4 like 21 [Source:HGNC Symbol;Acc:HGNC:50802]	AFFY_PRIMEVIEW
24	11715200_S_AT	24.12	ENSG00000260596	DUX4	double homeobox 4 [Source:HGNC Symbol;Acc:HGNC:50800]	AFFY_PRIMEVIEW
24	11715200_S_AT	24.13	ENSG00000276964	DUX4L23	double homeobox 4 like 23 [Source:HGNC Symbol;Acc:HGNC:50804]	AFFY_PRIMEVIEW
24	11715200_S_AT	24.14	ENSG00000281058	DUX4L6	double homeobox 4 like 6 [Source:HGNC Symbol;Acc:HGNC:37265]	AFFY_PRIMEVIEW
24	11715200_S_AT	24.15	ENSG00000278761	DUX4L11	double homeobox 4 like 11 [Source:HGNC Symbol;Acc:HGNC:38687]	AFFY_PRIMEVIEW
24	11715200_S_AT	24.16	ENSG00000281627	DUX4L3	double homeobox 4 like 3 [Source:HGNC Symbol;Acc:HGNC:38688]	AFFY_PRIMEVIEW
24	11715200_S_AT	24.17	ENSG00000281591	DBET	D4Z4 binding element transcript (non-protein coding) [Source:HGNC Symbol;Acc:HGNC:43904]	AFFY_PRIMEVIEW
24	11715200_S_AT	24.18	ENSG00000237635	DUX4L29	double homeobox 4 like 29 [Source:HGNC Symbol;Acc:HGNC:51606]	AFFY_PRIMEVIEW
24	11715200_S_AT	24.19	ENSG00000276164	DUX4L20	double homeobox 4 like 20 [Source:HGNC Symbol;Acc:HGNC:50801]	AFFY_PRIMEVIEW
24	11715200_S_AT	24.2	ENSG00000281720	DUX4L8	double homeobox 4 like 8 [Source:HGNC Symbol;Acc:HGNC:38670]	AFFY_PRIMEVIEW
24	11715200_S_AT	24.21	ENSG00000278790	DUX4L12	double homeobox 4 like 12 [Source:HGNC Symbol;Acc:HGNC:38671]	AFFY_PRIMEVIEW
24	11715200_S_AT	24.22	ENSG00000281652	DUX4L7	double homeobox 4 like 7 [Source:HGNC Symbol;Acc:HGNC:37266]	AFFY_PRIMEVIEW
24	11715200_S_AT	24.23	ENSG00000277274	DUX4L22	double homeobox 4 like 22 [Source:HGNC Symbol;Acc:HGNC:50803]	AFFY_PRIMEVIEW
24	11715200_S_AT	24.24	ENSG00000277162	U85056.1	N/A	AFFY_PRIMEVIEW
24	11715200_S_AT	24.25	ENSG00000280337	DUX4L25	double homeobox 4 like 25 [Source:HGNC Symbol;Acc:HGNC:50806]	AFFY_PRIMEVIEW
25	11715205_X_AT	25.1	ENSG00000243137	PSG4	pregnancy specific beta-1-glycoprotein 4 [Source:HGNC Symbol;Acc:HGNC:9521]	AFFY_PRIMEVIEW
26	11715206_X_AT	26.1	ENSG00000243137	PSG4	pregnancy specific beta-1-glycoprotein 4 [Source:HGNC Symbol;Acc:HGNC:9521]	AFFY_PRIMEVIEW
27	11715213_S_AT	27.1	N/A	N/A	N/A	N/A
28	11715219_S_AT	28.1	ENSG00000196747	HIST1H2AI	histone cluster 1 H2A family member i [Source:HGNC Symbol;Acc:HGNC:4725]	AFFY_PRIMEVIEW
29	11715220_S_AT	29.1	ENSG00000163026	WDCP	WD repeat and coiled coil containing [Source:HGNC Symbol;Acc:HGNC:26157]	AFFY_PRIMEVIEW
30	11715226_S_AT	30.1	ENSG00000081842	PCDHA6	protocadherin alpha 6 [Source:HGNC Symbol;Acc:HGNC:8672]	AFFY_PRIMEVIEW
31	11715230_S_AT	31.1	ENSG00000102981	PARD6A	par-6 family cell polarity regulator alpha [Source:HGNC Symbol;Acc:HGNC:15943]	AFFY_PRIMEVIEW
32	11715232_X_AT	32.1	ENSG00000130255	RPL36	ribosomal protein L36 [Source:HGNC Symbol;Acc:HGNC:13631]	AFFY_PRIMEVIEW
33	11715241_S_AT	33.1	ENSG00000172155	LCE1D	late cornified envelope 1D [Source:HGNC Symbol;Acc:HGNC:29465]	AFFY_PRIMEVIEW
34	11715245_S_AT	34.1	ENSG00000128322	IGLL1	immunoglobulin lambda like polypeptide 1 [Source:HGNC Symbol;Acc:HGNC:5870]	AFFY_PRIMEVIEW
34	11715245_S_AT	34.2	ENSG00000272733	AP000345.2	N/A	AFFY_PRIMEVIEW
35	11715248_S_AT	35.1	ENSG00000124490	CRISP2	cysteine rich secretory protein 2 [Source:HGNC Symbol;Acc:HGNC:12024]	AFFY_PRIMEVIEW
36	11715256_AT	36.1	ENSG00000171402	XAGE3	X antigen family member 3 [Source:HGNC Symbol;Acc:HGNC:14618]	AFFY_PRIMEVIEW
37	11715258_S_AT	37.1	ENSG00000159335	PTMS	parathymosin [Source:HGNC Symbol;Acc:HGNC:9629]	AFFY_PRIMEVIEW
38	11715259_S_AT	38.1	ENSG00000147873	IFNA5	interferon alpha 5 [Source:HGNC Symbol;Acc:HGNC:5426]	AFFY_PRIMEVIEW
39	11715261_S_AT	39.1	ENSG00000179412	HNRNPCL4	heterogeneous nuclear ribonucleoprotein C-like 4 [Source:HGNC Symbol;Acc:HGNC:51333]	AFFY_PRIMEVIEW
39	11715261_S_AT	39.2	ENSG00000277058	HNRNPCL3	heterogeneous nuclear ribonucleoprotein C-like 3 [Source:HGNC Symbol;Acc:HGNC:51235]	AFFY_PRIMEVIEW
39	11715261_S_AT	39.3	ENSG00000275774	HNRNPCL2	heterogeneous nuclear ribonucleoprotein C-like 2 [Source:HGNC Symbol;Acc:HGNC:48813]	AFFY_PRIMEVIEW
40	11715264_S_AT	40.1	ENSG00000181408	UTS2R	urotensin 2 receptor [Source:HGNC Symbol;Acc:HGNC:4468]	AFFY_PRIMEVIEW
41	11715267_S_AT	41.1	ENSG00000261150	EPPK1	epiplakin 1 [Source:HGNC Symbol;Acc:HGNC:15577]	AFFY_PRIMEVIEW
42	11715268_S_AT	42.1	ENSG00000284874	AC000093.1	N/A	AFFY_PRIMEVIEW
42	11715268_S_AT	42.2	ENSG00000203618	GP1BB	glycoprotein Ib platelet subunit beta [Source:HGNC Symbol;Acc:HGNC:4440]	AFFY_PRIMEVIEW
42	11715268_S_AT	42.3	ENSG00000184702	SEPT5	septin 5 [Source:HGNC Symbol;Acc:HGNC:9164]	AFFY_PRIMEVIEW
43	11715271_S_AT	43.1	ENSG00000281720	DUX4L8	double homeobox 4 like 8 [Source:HGNC Symbol;Acc:HGNC:38670]	AFFY_PRIMEVIEW
43	11715271_S_AT	43.2	ENSG00000281652	DUX4L7	double homeobox 4 like 7 [Source:HGNC Symbol;Acc:HGNC:37266]	AFFY_PRIMEVIEW
43	11715271_S_AT	43.3	ENSG00000278790	DUX4L12	double homeobox 4 like 12 [Source:HGNC Symbol;Acc:HGNC:38671]	AFFY_PRIMEVIEW
43	11715271_S_AT	43.4	ENSG00000277162	U85056.1	N/A	AFFY_PRIMEVIEW
43	11715271_S_AT	43.5	ENSG00000277274	DUX4L22	double homeobox 4 like 22 [Source:HGNC Symbol;Acc:HGNC:50803]	AFFY_PRIMEVIEW
43	11715271_S_AT	43.6	ENSG00000280337	DUX4L25	double homeobox 4 like 25 [Source:HGNC Symbol;Acc:HGNC:50806]	AFFY_PRIMEVIEW
43	11715271_S_AT	43.7	ENSG00000276964	DUX4L23	double homeobox 4 like 23 [Source:HGNC Symbol;Acc:HGNC:50804]	AFFY_PRIMEVIEW
43	11715271_S_AT	43.8	ENSG00000278761	DUX4L11	double homeobox 4 like 11 [Source:HGNC Symbol;Acc:HGNC:38687]	AFFY_PRIMEVIEW
43	11715271_S_AT	43.9	ENSG00000281058	DUX4L6	double homeobox 4 like 6 [Source:HGNC Symbol;Acc:HGNC:37265]	AFFY_PRIMEVIEW
43	11715271_S_AT	43.1	ENSG00000281591	DBET	D4Z4 binding element transcript (non-protein coding) [Source:HGNC Symbol;Acc:HGNC:43904]	AFFY_PRIMEVIEW
43	11715271_S_AT	43.11	ENSG00000281627	DUX4L3	double homeobox 4 like 3 [Source:HGNC Symbol;Acc:HGNC:38688]	AFFY_PRIMEVIEW
43	11715271_S_AT	43.12	ENSG00000276164	DUX4L20	double homeobox 4 like 20 [Source:HGNC Symbol;Acc:HGNC:50801]	AFFY_PRIMEVIEW
43	11715271_S_AT	43.13	ENSG00000237635	DUX4L29	double homeobox 4 like 29 [Source:HGNC Symbol;Acc:HGNC:51606]	AFFY_PRIMEVIEW
43	11715271_S_AT	43.14	ENSG00000274599	DUX4L24	double homeobox 4 like 24 [Source:HGNC Symbol;Acc:HGNC:50805]	AFFY_PRIMEVIEW
43	11715271_S_AT	43.15	ENSG00000276046	DUX4L13	double homeobox 4 like 13 [Source:HGNC Symbol;Acc:HGNC:38672]	AFFY_PRIMEVIEW
43	11715271_S_AT	43.16	ENSG00000275610	DUX4L21	double homeobox 4 like 21 [Source:HGNC Symbol;Acc:HGNC:50802]	AFFY_PRIMEVIEW
43	11715271_S_AT	43.17	ENSG00000258834	DUX4L4	double homeobox 4 like 4 [Source:HGNC Symbol;Acc:HGNC:38686]	AFFY_PRIMEVIEW
43	11715271_S_AT	43.18	ENSG00000279626	DUX4L28	double homeobox 4 like 28 [Source:HGNC Symbol;Acc:HGNC:51605]	AFFY_PRIMEVIEW
43	11715271_S_AT	43.19	ENSG00000280457	DUX4L2	double homeobox 4 like 2 [Source:HGNC Symbol;Acc:HGNC:37267]	AFFY_PRIMEVIEW
43	11715271_S_AT	43.2	ENSG00000280757	DUX4L1	double homeobox 4 like 1 [Source:HGNC Symbol;Acc:HGNC:3082]	AFFY_PRIMEVIEW
43	11715271_S_AT	43.21	ENSG00000260596	DUX4	double homeobox 4 [Source:HGNC Symbol;Acc:HGNC:50800]	AFFY_PRIMEVIEW
43	11715271_S_AT	43.22	ENSG00000278664	DUX4L10	double homeobox 4 like 10 [Source:HGNC Symbol;Acc:HGNC:31354]	AFFY_PRIMEVIEW
43	11715271_S_AT	43.23	ENSG00000276904	DUX4L14	double homeobox 4 like 14 [Source:HGNC Symbol;Acc:HGNC:38673]	AFFY_PRIMEVIEW
43	11715271_S_AT	43.24	ENSG00000278641	DUX4L15	double homeobox 4 like 15 [Source:HGNC Symbol;Acc:HGNC:38674]	AFFY_PRIMEVIEW
43	11715271_S_AT	43.25	ENSG00000280799	DUX4L5	double homeobox 4 like 5 [Source:HGNC Symbol;Acc:HGNC:38689]	AFFY_PRIMEVIEW
44	11715274_X_AT	44.1	ENSG00000198467	TPM2	tropomyosin 2 [Source:HGNC Symbol;Acc:HGNC:12011]	AFFY_PRIMEVIEW
45	11715298_X_AT	45.1	N/A	N/A	N/A	N/A
46	11715306_S_AT	46.1	ENSG00000109321	AREG	amphiregulin [Source:HGNC Symbol;Acc:HGNC:651]	AFFY_PRIMEVIEW
47	11715311_S_AT	47.1	ENSG00000177243	DEFB103B	defensin beta 103B [Source:HGNC Symbol;Acc:HGNC:31702]	AFFY_PRIMEVIEW
47	11715311_S_AT	47.2	ENSG00000176797	DEFB103A	defensin beta 103A [Source:HGNC Symbol;Acc:HGNC:15967]	AFFY_PRIMEVIEW
48	11715318_S_AT	48.1	ENSG00000276490	AL583836.1	N/A	AFFY_PRIMEVIEW
48	11715318_S_AT	48.2	ENSG00000165841	CYP2C19	cytochrome P450 family 2 subfamily C member 19 [Source:HGNC Symbol;Acc:HGNC:2621]	AFFY_PRIMEVIEW
49	11715329_AT	49.1	ENSG00000072041	SLC6A15	solute carrier family 6 member 15 [Source:HGNC Symbol;Acc:HGNC:13621]	AFFY_PRIMEVIEW
50	11715331_X_AT	50.1	ENSG00000149636	DSN1	DSN1 homolog, MIS12 kinetochore complex component [Source:HGNC Symbol;Acc:HGNC:16165]	AFFY_PRIMEVIEW
51	11715343_AT	51.1	ENSG00000181143	MUC16	mucin 16, cell surface associated [Source:HGNC Symbol;Acc:HGNC:15582]	AFFY_PRIMEVIEW
52	11715350_A_AT	52.1	ENSG00000108821	COL1A1	collagen type I alpha 1 chain [Source:HGNC Symbol;Acc:HGNC:2197]	AFFY_PRIMEVIEW
53	11715379_A_AT	53.1	ENSG00000104341	LAPTM4B	lysosomal protein transmembrane 4 beta [Source:HGNC Symbol;Acc:HGNC:13646]	AFFY_PRIMEVIEW
54	11715381_A_AT	54.1	ENSG00000104341	LAPTM4B	lysosomal protein transmembrane 4 beta [Source:HGNC Symbol;Acc:HGNC:13646]	AFFY_PRIMEVIEW
55	11715386_AT	55.1	ENSG00000115386	REG1A	regenerating family member 1 alpha [Source:HGNC Symbol;Acc:HGNC:9951]	AFFY_PRIMEVIEW
56	11715397_X_AT	56.1	ENSG00000221716	SNORA11	small nucleolar RNA, H/ACA box 11 [Source:HGNC Symbol;Acc:HGNC:32599]	AFFY_PRIMEVIEW
56	11715397_X_AT	56.2	ENSG00000102316	MAGED2	MAGE family member D2 [Source:HGNC Symbol;Acc:HGNC:16353]	AFFY_PRIMEVIEW
57	11715408_X_AT	57.1	ENSG00000159377	PSMB4	proteasome subunit beta 4 [Source:HGNC Symbol;Acc:HGNC:9541]	AFFY_PRIMEVIEW
58	11715412_A_AT	58.1	ENSG00000116016	EPAS1	endothelial PAS domain protein 1 [Source:HGNC Symbol;Acc:HGNC:3374]	AFFY_PRIMEVIEW
59	11715423_S_AT	59.1	ENSG00000185825	BCAP31	B cell receptor associated protein 31 [Source:HGNC Symbol;Acc:HGNC:16695]	AFFY_PRIMEVIEW
60	11715424_X_AT	60.1	ENSG00000185825	BCAP31	B cell receptor associated protein 31 [Source:HGNC Symbol;Acc:HGNC:16695]	AFFY_PRIMEVIEW
61	11715426_S_AT	61.1	ENSG00000100138	SNU13	small nuclear ribonucleoprotein 13 [Source:HGNC Symbol;Acc:HGNC:7819]	AFFY_PRIMEVIEW
62	11715445_A_AT	62.1	ENSG00000132002	DNAJB1	DnaJ heat shock protein family (Hsp40) member B1 [Source:HGNC Symbol;Acc:HGNC:5270]	AFFY_PRIMEVIEW
63	11715446_A_AT	63.1	ENSG00000132002	DNAJB1	DnaJ heat shock protein family (Hsp40) member B1 [Source:HGNC Symbol;Acc:HGNC:5270]	AFFY_PRIMEVIEW
64	11715453_A_AT	64.1	ENSG00000134871	COL4A2	collagen type IV alpha 2 chain [Source:HGNC Symbol;Acc:HGNC:2203]	AFFY_PRIMEVIEW
65	11715473_AT	65.1	ENSG00000182934	SRPRA	SRP receptor subunit alpha [Source:HGNC Symbol;Acc:HGNC:11307]	AFFY_PRIMEVIEW
66	11715499_X_AT	66.1	ENSG00000122565	CBX3	chromobox 3 [Source:HGNC Symbol;Acc:HGNC:1553]	AFFY_PRIMEVIEW
67	11715517_S_AT	67.1	ENSG00000013306	SLC25A39	solute carrier family 25 member 39 [Source:HGNC Symbol;Acc:HGNC:24279]	AFFY_PRIMEVIEW
68	11715521_A_AT	68.1	ENSG00000110917	MLEC	malectin [Source:HGNC Symbol;Acc:HGNC:28973]	AFFY_PRIMEVIEW
69	11715525_A_AT	69.1	ENSG00000198563	DDX39B	DExD-box helicase 39B [Source:HGNC Symbol;Acc:HGNC:13917]	AFFY_PRIMEVIEW
69	11715525_A_AT	69.2	ENSG00000254870	ATP6V1G2-DDX39B	ATP6V1G2-DDX39B readthrough (NMD candidate) [Source:HGNC Symbol;Acc:HGNC:41999]	AFFY_PRIMEVIEW
70	11715535_A_AT	70.1	ENSG00000169727	GPS1	G protein pathway suppressor 1 [Source:HGNC Symbol;Acc:HGNC:4549]	AFFY_PRIMEVIEW
71	11715542_S_AT	71.1	ENSG00000154096	THY1	Thy-1 cell surface antigen [Source:HGNC Symbol;Acc:HGNC:11801]	AFFY_PRIMEVIEW
72	11715562_X_AT	72.1	ENSG00000099194	SCD	stearoyl-CoA desaturase [Source:HGNC Symbol;Acc:HGNC:10571]	AFFY_PRIMEVIEW
73	11715575_X_AT	73.1	ENSG00000115241	PPM1G	protein phosphatase, Mg2+/Mn2+ dependent 1G [Source:HGNC Symbol;Acc:HGNC:9278]	AFFY_PRIMEVIEW
74	11715577_X_AT	74.1	ENSG00000136238	RAC1	Rac family small GTPase 1 [Source:HGNC Symbol;Acc:HGNC:9801]	AFFY_PRIMEVIEW
75	11715590_AT	75.1	ENSG00000197102	DYNC1H1	dynein cytoplasmic 1 heavy chain 1 [Source:HGNC Symbol;Acc:HGNC:2961]	AFFY_PRIMEVIEW
76	11715601_A_AT	76.1	ENSG00000204619	PPP1R11	protein phosphatase 1 regulatory inhibitor subunit 11 [Source:HGNC Symbol;Acc:HGNC:9285]	AFFY_PRIMEVIEW
77	11715606_A_AT	77.1	ENSG00000102804	TSC22D1	TSC22 domain family member 1 [Source:HGNC Symbol;Acc:HGNC:16826]	AFFY_PRIMEVIEW
78	11715636_A_AT	78.1	ENSG00000106366	SERPINE1	serpin family E member 1 [Source:HGNC Symbol;Acc:HGNC:8583]	AFFY_PRIMEVIEW
79	11715641_A_AT	79.1	ENSG00000182670	TTC3	tetratricopeptide repeat domain 3 [Source:HGNC Symbol;Acc:HGNC:12393]	AFFY_PRIMEVIEW
80	11715644_S_AT	80.1	ENSG00000182220	ATP6AP2	ATPase H+ transporting accessory protein 2 [Source:HGNC Symbol;Acc:HGNC:18305]	AFFY_PRIMEVIEW
81	11715646_A_AT	81.1	ENSG00000159346	ADIPOR1	adiponectin receptor 1 [Source:HGNC Symbol;Acc:HGNC:24040]	AFFY_PRIMEVIEW
82	11715660_A_AT	82.1	ENSG00000118705	RPN2	ribophorin II [Source:HGNC Symbol;Acc:HGNC:10382]	AFFY_PRIMEVIEW
83	11715661_A_AT	83.1	ENSG00000124208	TMEM189-UBE2V1	TMEM189-UBE2V1 readthrough [Source:HGNC Symbol;Acc:HGNC:33521]	AFFY_PRIMEVIEW
83	11715661_A_AT	83.2	ENSG00000244687	UBE2V1	ubiquitin conjugating enzyme E2 V1 [Source:HGNC Symbol;Acc:HGNC:12494]	AFFY_PRIMEVIEW
84	11715688_X_AT	84.1	ENSG00000168928	CTRB2	chymotrypsinogen B2 [Source:HGNC Symbol;Acc:HGNC:2522]	AFFY_PRIMEVIEW
85	11715696_A_AT	85.1	ENSG00000166197	NOLC1	nucleolar and coiled-body phosphoprotein 1 [Source:HGNC Symbol;Acc:HGNC:15608]	AFFY_PRIMEVIEW
86	11715700_S_AT	86.1	ENSG00000178252	WDR6	WD repeat domain 6 [Source:HGNC Symbol;Acc:HGNC:12758]	AFFY_PRIMEVIEW
87	11715714_S_AT	87.1	ENSG00000154978	VOPP1	VOPP1, WBP1/VOPP1 family member [Source:HGNC Symbol;Acc:HGNC:34518]	AFFY_PRIMEVIEW
87	11715714_S_AT	87.2	ENSG00000223612	AC241585.1	N/A	AFFY_PRIMEVIEW
88	11715718_A_AT	88.1	ENSG00000106400	ZNHIT1	zinc finger HIT-type containing 1 [Source:HGNC Symbol;Acc:HGNC:21688]	AFFY_PRIMEVIEW
89	11715719_X_AT	89.1	ENSG00000105401	CDC37	cell division cycle 37 [Source:HGNC Symbol;Acc:HGNC:1735]	AFFY_PRIMEVIEW
90	11715728_A_AT	90.1	ENSG00000150093	ITGB1	integrin subunit beta 1 [Source:HGNC Symbol;Acc:HGNC:6153]	AFFY_PRIMEVIEW
91	11715733_A_AT	91.1	ENSG00000184117	NIPSNAP1	nipsnap homolog 1 [Source:HGNC Symbol;Acc:HGNC:7827]	AFFY_PRIMEVIEW
92	11715735_A_AT	92.1	ENSG00000152558	TMEM123	transmembrane protein 123 [Source:HGNC Symbol;Acc:HGNC:30138]	AFFY_PRIMEVIEW
93	11715737_AT	93.1	ENSG00000108349	CASC3	CASC3, exon junction complex subunit [Source:HGNC Symbol;Acc:HGNC:17040]	AFFY_PRIMEVIEW
94	11715749_S_AT	94.1	ENSG00000149136	SSRP1	structure specific recognition protein 1 [Source:HGNC Symbol;Acc:HGNC:11327]	AFFY_PRIMEVIEW
95	11715762_S_AT	95.1	ENSG00000072958	AP1M1	adaptor related protein complex 1 subunit mu 1 [Source:HGNC Symbol;Acc:HGNC:13667]	AFFY_PRIMEVIEW
96	11715782_A_AT	96.1	ENSG00000167658	EEF2	eukaryotic translation elongation factor 2 [Source:HGNC Symbol;Acc:HGNC:3214]	AFFY_PRIMEVIEW
97	11715783_X_AT	97.1	ENSG00000167658	EEF2	eukaryotic translation elongation factor 2 [Source:HGNC Symbol;Acc:HGNC:3214]	AFFY_PRIMEVIEW
98	11715786_AT	98.1	ENSG00000106397	PLOD3	procollagen-lysine,2-oxoglutarate 5-dioxygenase 3 [Source:HGNC Symbol;Acc:HGNC:9083]	AFFY_PRIMEVIEW
99	11715808_A_AT	99.1	ENSG00000100994	PYGB	glycogen phosphorylase B [Source:HGNC Symbol;Acc:HGNC:9723]	AFFY_PRIMEVIEW
100	11715809_A_AT	100.1	ENSG00000100994	PYGB	glycogen phosphorylase B [Source:HGNC Symbol;Acc:HGNC:9723]	AFFY_PRIMEVIEW
101	11715814_A_AT	101.1	ENSG00000126602	TRAP1	TNF receptor associated protein 1 [Source:HGNC Symbol;Acc:HGNC:16264]	AFFY_PRIMEVIEW
102	11715832_S_AT	102.1	ENSG00000148248	SURF4	surfeit 4 [Source:HGNC Symbol;Acc:HGNC:11476]	AFFY_PRIMEVIEW
103	11715838_A_AT	103.1	ENSG00000204386	NEU1	neuraminidase 1 [Source:HGNC Symbol;Acc:HGNC:7758]	AFFY_PRIMEVIEW
104	11715861_A_AT	104.1	ENSG00000213493	ACTN4P1	actinin alpha 4 pseudogene 1 [Source:HGNC Symbol;Acc:HGNC:44028]	AFFY_PRIMEVIEW
104	11715861_A_AT	104.2	ENSG00000130402	ACTN4	actinin alpha 4 [Source:HGNC Symbol;Acc:HGNC:166]	AFFY_PRIMEVIEW
105	11715882_S_AT	105.1	ENSG00000132676	DAP3	death associated protein 3 [Source:HGNC Symbol;Acc:HGNC:2673]	AFFY_PRIMEVIEW
106	11715888_S_AT	106.1	ENSG00000276293	PIP4K2B	phosphatidylinositol-5-phosphate 4-kinase type 2 beta [Source:HGNC Symbol;Acc:HGNC:8998]	AFFY_PRIMEVIEW
107	11715902_A_AT	107.1	ENSG00000174243	DDX23	DEAD-box helicase 23 [Source:HGNC Symbol;Acc:HGNC:17347]	AFFY_PRIMEVIEW
108	11715909_S_AT	108.1	ENSG00000196586	MYO6	myosin VI [Source:HGNC Symbol;Acc:HGNC:7605]	AFFY_PRIMEVIEW
109	11715910_A_AT	109.1	ENSG00000196586	MYO6	myosin VI [Source:HGNC Symbol;Acc:HGNC:7605]	AFFY_PRIMEVIEW
110	11715912_AT	110.1	ENSG00000090776	EFNB1	ephrin B1 [Source:HGNC Symbol;Acc:HGNC:3226]	AFFY_PRIMEVIEW
111	11715913_S_AT	111.1	ENSG00000090776	EFNB1	ephrin B1 [Source:HGNC Symbol;Acc:HGNC:3226]	AFFY_PRIMEVIEW
112	11715917_A_AT	112.1	ENSG00000026508	CD44	CD44 molecule (Indian blood group) [Source:HGNC Symbol;Acc:HGNC:1681]	AFFY_PRIMEVIEW
113	11715923_A_AT	113.1	ENSG00000100983	GSS	glutathione synthetase [Source:HGNC Symbol;Acc:HGNC:4624]	AFFY_PRIMEVIEW
114	11715926_S_AT	114.1	ENSG00000178209	PLEC	plectin [Source:HGNC Symbol;Acc:HGNC:9069]	AFFY_PRIMEVIEW
115	11715929_X_AT	115.1	ENSG00000141985	SH3GL1	SH3 domain containing GRB2 like 1, endophilin A2 [Source:HGNC Symbol;Acc:HGNC:10830]	AFFY_PRIMEVIEW
116	11715960_X_AT	116.1	ENSG00000114503	NCBP2	nuclear cap binding protein subunit 2 [Source:HGNC Symbol;Acc:HGNC:7659]	AFFY_PRIMEVIEW
117	11715980_AT	117.1	ENSG00000110711	AIP	aryl hydrocarbon receptor interacting protein [Source:HGNC Symbol;Acc:HGNC:358]	AFFY_PRIMEVIEW
117	11715980_AT	117.2	ENSG00000276769	MIR6752	microRNA 6752 [Source:HGNC Symbol;Acc:HGNC:50020]	AFFY_PRIMEVIEW
118	11715982_A_AT	118.1	ENSG00000169718	DUS1L	dihydrouridine synthase 1 like [Source:HGNC Symbol;Acc:HGNC:30086]	AFFY_PRIMEVIEW
119	11715984_S_AT	119.1	ENSG00000101126	ADNP	activity dependent neuroprotector homeobox [Source:HGNC Symbol;Acc:HGNC:15766]	AFFY_PRIMEVIEW
120	11715993_S_AT	120.1	ENSG00000197912	SPG7	SPG7, paraplegin matrix AAA peptidase subunit [Source:HGNC Symbol;Acc:HGNC:11237]	AFFY_PRIMEVIEW
121	11715996_A_AT	121.1	ENSG00000142546	NOSIP	nitric oxide synthase interacting protein [Source:HGNC Symbol;Acc:HGNC:17946]	AFFY_PRIMEVIEW
122	11716000_A_AT	122.1	ENSG00000113194	FAF2	Fas associated factor family member 2 [Source:HGNC Symbol;Acc:HGNC:24666]	AFFY_PRIMEVIEW
123	11716002_AT	123.1	ENSG00000113194	FAF2	Fas associated factor family member 2 [Source:HGNC Symbol;Acc:HGNC:24666]	AFFY_PRIMEVIEW
124	11716005_A_AT	124.1	ENSG00000149428	HYOU1	hypoxia up-regulated 1 [Source:HGNC Symbol;Acc:HGNC:16931]	AFFY_PRIMEVIEW
125	11716037_X_AT	125.1	ENSG00000197858	GPAA1	glycosylphosphatidylinositol anchor attachment 1 [Source:HGNC Symbol;Acc:HGNC:4446]	AFFY_PRIMEVIEW
126	11716055_S_AT	126.1	ENSG00000197457	STMN3	stathmin 3 [Source:HGNC Symbol;Acc:HGNC:15926]	AFFY_PRIMEVIEW
127	11716059_X_AT	127.1	ENSG00000108883	EFTUD2	elongation factor Tu GTP binding domain containing 2 [Source:HGNC Symbol;Acc:HGNC:30858]	AFFY_PRIMEVIEW
128	11716067_AT	128.1	ENSG00000220205	VAMP2	vesicle associated membrane protein 2 [Source:HGNC Symbol;Acc:HGNC:12643]	AFFY_PRIMEVIEW
129	11716071_S_AT	129.1	ENSG00000198355	PIM3	Pim-3 proto-oncogene, serine/threonine kinase [Source:HGNC Symbol;Acc:HGNC:19310]	AFFY_PRIMEVIEW
129	11716071_S_AT	129.2	ENSG00000276753	MIR6821	microRNA 6821 [Source:HGNC Symbol;Acc:HGNC:49980]	AFFY_PRIMEVIEW
130	11716078_A_AT	130.1	ENSG00000012660	ELOVL5	ELOVL fatty acid elongase 5 [Source:HGNC Symbol;Acc:HGNC:21308]	AFFY_PRIMEVIEW
131	11716080_A_AT	131.1	ENSG00000012822	CALCOCO1	calcium binding and coiled-coil domain 1 [Source:HGNC Symbol;Acc:HGNC:29306]	AFFY_PRIMEVIEW
132	11716081_A_AT	132.1	ENSG00000116455	WDR77	WD repeat domain 77 [Source:HGNC Symbol;Acc:HGNC:29652]	AFFY_PRIMEVIEW
133	11716096_A_AT	133.1	ENSG00000104969	SGTA	small glutamine rich tetratricopeptide repeat containing alpha [Source:HGNC Symbol;Acc:HGNC:10819]	AFFY_PRIMEVIEW
134	11716120_A_AT	134.1	ENSG00000119333	WDR34	WD repeat domain 34 [Source:HGNC Symbol;Acc:HGNC:28296]	AFFY_PRIMEVIEW
135	11716123_A_AT	135.1	ENSG00000135372	NAT10	N-acetyltransferase 10 [Source:HGNC Symbol;Acc:HGNC:29830]	AFFY_PRIMEVIEW
136	11716124_A_AT	136.1	ENSG00000135372	NAT10	N-acetyltransferase 10 [Source:HGNC Symbol;Acc:HGNC:29830]	AFFY_PRIMEVIEW
137	11716129_AT	137.1	ENSG00000197081	IGF2R	insulin like growth factor 2 receptor [Source:HGNC Symbol;Acc:HGNC:5467]	AFFY_PRIMEVIEW
138	11716132_A_AT	138.1	ENSG00000070404	FSTL3	follistatin like 3 [Source:HGNC Symbol;Acc:HGNC:3973]	AFFY_PRIMEVIEW
139	11716143_A_AT	139.1	ENSG00000147955	SIGMAR1	sigma non-opioid intracellular receptor 1 [Source:HGNC Symbol;Acc:HGNC:8157]	AFFY_PRIMEVIEW
140	11716154_X_AT	140.1	ENSG00000086062	B4GALT1	beta-1,4-galactosyltransferase 1 [Source:HGNC Symbol;Acc:HGNC:924]	AFFY_PRIMEVIEW
141	11716157_AT	141.1	ENSG00000140320	BAHD1	bromo adjacent homology domain containing 1 [Source:HGNC Symbol;Acc:HGNC:29153]	AFFY_PRIMEVIEW
142	11716159_A_AT	142.1	ENSG00000103549	RNF40	ring finger protein 40 [Source:HGNC Symbol;Acc:HGNC:16867]	AFFY_PRIMEVIEW
143	11716161_S_AT	143.1	ENSG00000213626	LBH	limb bud and heart development [Source:HGNC Symbol;Acc:HGNC:29532]	AFFY_PRIMEVIEW
144	11716166_X_AT	144.1	ENSG00000238082	AC009948.2	N/A	AFFY_PRIMEVIEW
144	11716166_X_AT	144.2	ENSG00000090273	NUDC	nuclear distribution C, dynein complex regulator [Source:HGNC Symbol;Acc:HGNC:8045]	AFFY_PRIMEVIEW
145	11716170_AT	145.1	ENSG00000176619	LMNB2	lamin B2 [Source:HGNC Symbol;Acc:HGNC:6638]	AFFY_PRIMEVIEW
146	11716215_AT	146.1	ENSG00000205250	E2F4	E2F transcription factor 4 [Source:HGNC Symbol;Acc:HGNC:3118]	AFFY_PRIMEVIEW
147	11716233_A_AT	147.1	ENSG00000178585	CTNNBIP1	catenin beta interacting protein 1 [Source:HGNC Symbol;Acc:HGNC:16913]	AFFY_PRIMEVIEW
148	11716234_S_AT	148.1	ENSG00000178585	CTNNBIP1	catenin beta interacting protein 1 [Source:HGNC Symbol;Acc:HGNC:16913]	AFFY_PRIMEVIEW
149	11716235_A_AT	149.1	ENSG00000101146	RAE1	ribonucleic acid export 1 [Source:HGNC Symbol;Acc:HGNC:9828]	AFFY_PRIMEVIEW
150	11716242_A_AT	150.1	ENSG00000100029	PES1	pescadillo ribosomal biogenesis factor 1 [Source:HGNC Symbol;Acc:HGNC:8848]	AFFY_PRIMEVIEW
151	11716258_AT	151.1	ENSG00000106615	RHEB	Ras homolog, mTORC1 binding [Source:HGNC Symbol;Acc:HGNC:10011]	AFFY_PRIMEVIEW
152	11716269_S_AT	152.1	ENSG00000273088	AL713999.1	N/A	AFFY_PRIMEVIEW
152	11716269_S_AT	152.2	ENSG00000163463	KRTCAP2	keratinocyte associated protein 2 [Source:HGNC Symbol;Acc:HGNC:28942]	AFFY_PRIMEVIEW
153	11716275_A_AT	153.1	ENSG00000094916	CBX5	chromobox 5 [Source:HGNC Symbol;Acc:HGNC:1555]	AFFY_PRIMEVIEW
154	11716277_A_AT	154.1	ENSG00000094916	CBX5	chromobox 5 [Source:HGNC Symbol;Acc:HGNC:1555]	AFFY_PRIMEVIEW
154	11716277_A_AT	154.2	ENSG00000283803	MIR3198-2	microRNA 3198-2 [Source:HGNC Symbol;Acc:HGNC:41766]	AFFY_PRIMEVIEW
155	11716278_S_AT	155.1	ENSG00000094916	CBX5	chromobox 5 [Source:HGNC Symbol;Acc:HGNC:1555]	AFFY_PRIMEVIEW
155	11716278_S_AT	155.2	ENSG00000283803	MIR3198-2	microRNA 3198-2 [Source:HGNC Symbol;Acc:HGNC:41766]	AFFY_PRIMEVIEW
155	11716278_S_AT	155.3	ENSG00000264757	MIR3198-1	microRNA 3198-1 [Source:HGNC Symbol;Acc:HGNC:38236]	AFFY_PRIMEVIEW
156	11716281_A_AT	156.1	ENSG00000182871	COL18A1	collagen type XVIII alpha 1 chain [Source:HGNC Symbol;Acc:HGNC:2195]	AFFY_PRIMEVIEW
157	11716284_S_AT	157.1	ENSG00000124767	GLO1	glyoxalase I [Source:HGNC Symbol;Acc:HGNC:4323]	AFFY_PRIMEVIEW
158	11716294_A_AT	158.1	ENSG00000110619	CARS	cysteinyl-tRNA synthetase [Source:HGNC Symbol;Acc:HGNC:1493]	AFFY_PRIMEVIEW
159	11716325_A_AT	159.1	ENSG00000013441	CLK1	CDC like kinase 1 [Source:HGNC Symbol;Acc:HGNC:2068]	AFFY_PRIMEVIEW
160	11716336_A_AT	160.1	ENSG00000143294	PRCC	papillary renal cell carcinoma (translocation-associated) [Source:HGNC Symbol;Acc:HGNC:9343]	AFFY_PRIMEVIEW
161	11716341_S_AT	161.1	ENSG00000169242	EFNA1	ephrin A1 [Source:HGNC Symbol;Acc:HGNC:3221]	AFFY_PRIMEVIEW
162	11716344_A_AT	162.1	ENSG00000247315	ZCCHC3	zinc finger CCHC-type containing 3 [Source:HGNC Symbol;Acc:HGNC:16230]	AFFY_PRIMEVIEW
163	11716352_A_AT	163.1	ENSG00000025772	TOMM34	translocase of outer mitochondrial membrane 34 [Source:HGNC Symbol;Acc:HGNC:15746]	AFFY_PRIMEVIEW
164	11716364_S_AT	164.1	ENSG00000070669	ASNS	asparagine synthetase (glutamine-hydrolyzing) [Source:HGNC Symbol;Acc:HGNC:753]	AFFY_PRIMEVIEW
164	11716364_S_AT	164.2	ENSG00000284707	AC079781.5	N/A	AFFY_PRIMEVIEW
165	11716365_X_AT	165.1	ENSG00000284707	AC079781.5	N/A	AFFY_PRIMEVIEW
165	11716365_X_AT	165.2	ENSG00000070669	ASNS	asparagine synthetase (glutamine-hydrolyzing) [Source:HGNC Symbol;Acc:HGNC:753]	AFFY_PRIMEVIEW
166	11716376_AT	166.1	ENSG00000188488	SERPINA5	serpin family A member 5 [Source:HGNC Symbol;Acc:HGNC:8723]	AFFY_PRIMEVIEW
167	11716382_A_AT	167.1	ENSG00000163468	CCT3	chaperonin containing TCP1 subunit 3 [Source:HGNC Symbol;Acc:HGNC:1616]	AFFY_PRIMEVIEW
168	11716383_X_AT	168.1	ENSG00000163468	CCT3	chaperonin containing TCP1 subunit 3 [Source:HGNC Symbol;Acc:HGNC:1616]	AFFY_PRIMEVIEW
169	11716385_AT	169.1	ENSG00000105329	TGFB1	transforming growth factor beta 1 [Source:HGNC Symbol;Acc:HGNC:11766]	AFFY_PRIMEVIEW
170	11716388_A_AT	170.1	ENSG00000009954	BAZ1B	bromodomain adjacent to zinc finger domain 1B [Source:HGNC Symbol;Acc:HGNC:961]	AFFY_PRIMEVIEW
171	11716395_A_AT	171.1	ENSG00000205336	ADGRG1	adhesion G protein-coupled receptor G1 [Source:HGNC Symbol;Acc:HGNC:4512]	AFFY_PRIMEVIEW
172	11716408_A_AT	172.1	ENSG00000105976	MET	MET proto-oncogene, receptor tyrosine kinase [Source:HGNC Symbol;Acc:HGNC:7029]	AFFY_PRIMEVIEW
173	11716419_AT	173.1	ENSG00000115306	SPTBN1	spectrin beta, non-erythrocytic 1 [Source:HGNC Symbol;Acc:HGNC:11275]	AFFY_PRIMEVIEW
174	11716425_S_AT	174.1	ENSG00000262209	PCDHGB3	protocadherin gamma subfamily B, 3 [Source:HGNC Symbol;Acc:HGNC:8710]	AFFY_PRIMEVIEW
174	11716425_S_AT	174.2	ENSG00000262576	PCDHGA4	protocadherin gamma subfamily A, 4 [Source:HGNC Symbol;Acc:HGNC:8702]	AFFY_PRIMEVIEW
174	11716425_S_AT	174.3	ENSG00000254245	PCDHGA3	protocadherin gamma subfamily A, 3 [Source:HGNC Symbol;Acc:HGNC:8701]	AFFY_PRIMEVIEW
174	11716425_S_AT	174.4	ENSG00000081853	PCDHGA2	protocadherin gamma subfamily A, 2 [Source:HGNC Symbol;Acc:HGNC:8700]	AFFY_PRIMEVIEW
174	11716425_S_AT	174.5	ENSG00000254122	PCDHGB7	protocadherin gamma subfamily B, 7 [Source:HGNC Symbol;Acc:HGNC:8714]	AFFY_PRIMEVIEW
174	11716425_S_AT	174.6	ENSG00000253159	PCDHGA12	protocadherin gamma subfamily A, 12 [Source:HGNC Symbol;Acc:HGNC:8699]	AFFY_PRIMEVIEW
174	11716425_S_AT	174.7	ENSG00000253485	PCDHGA5	protocadherin gamma subfamily A, 5 [Source:HGNC Symbol;Acc:HGNC:8703]	AFFY_PRIMEVIEW
174	11716425_S_AT	174.8	ENSG00000253873	PCDHGA11	protocadherin gamma subfamily A, 11 [Source:HGNC Symbol;Acc:HGNC:8698]	AFFY_PRIMEVIEW
174	11716425_S_AT	174.9	ENSG00000253731	PCDHGA6	protocadherin gamma subfamily A, 6 [Source:HGNC Symbol;Acc:HGNC:8704]	AFFY_PRIMEVIEW
174	11716425_S_AT	174.1	ENSG00000276547	PCDHGB5	protocadherin gamma subfamily B, 5 [Source:HGNC Symbol;Acc:HGNC:8712]	AFFY_PRIMEVIEW
174	11716425_S_AT	174.11	ENSG00000253846	PCDHGA10	protocadherin gamma subfamily A, 10 [Source:HGNC Symbol;Acc:HGNC:8697]	AFFY_PRIMEVIEW
174	11716425_S_AT	174.12	ENSG00000204956	PCDHGA1	protocadherin gamma subfamily A, 1 [Source:HGNC Symbol;Acc:HGNC:8696]	AFFY_PRIMEVIEW
174	11716425_S_AT	174.13	ENSG00000240184	PCDHGC3	protocadherin gamma subfamily C, 3 [Source:HGNC Symbol;Acc:HGNC:8716]	AFFY_PRIMEVIEW
174	11716425_S_AT	174.14	ENSG00000253953	PCDHGB4	protocadherin gamma subfamily B, 4 [Source:HGNC Symbol;Acc:HGNC:8711]	AFFY_PRIMEVIEW
174	11716425_S_AT	174.15	ENSG00000253910	PCDHGB2	protocadherin gamma subfamily B, 2 [Source:HGNC Symbol;Acc:HGNC:8709]	AFFY_PRIMEVIEW
174	11716425_S_AT	174.16	ENSG00000261934	PCDHGA9	protocadherin gamma subfamily A, 9 [Source:HGNC Symbol;Acc:HGNC:8707]	AFFY_PRIMEVIEW
174	11716425_S_AT	174.17	ENSG00000254221	PCDHGB1	protocadherin gamma subfamily B, 1 [Source:HGNC Symbol;Acc:HGNC:8708]	AFFY_PRIMEVIEW
174	11716425_S_AT	174.18	ENSG00000253537	PCDHGA7	protocadherin gamma subfamily A, 7 [Source:HGNC Symbol;Acc:HGNC:8705]	AFFY_PRIMEVIEW
174	11716425_S_AT	174.19	ENSG00000242419	PCDHGC4	protocadherin gamma subfamily C, 4 [Source:HGNC Symbol;Acc:HGNC:8717]	AFFY_PRIMEVIEW
174	11716425_S_AT	174.2	ENSG00000253767	PCDHGA8	protocadherin gamma subfamily A, 8 [Source:HGNC Symbol;Acc:HGNC:8706]	AFFY_PRIMEVIEW
174	11716425_S_AT	174.21	ENSG00000253305	PCDHGB6	protocadherin gamma subfamily B, 6 [Source:HGNC Symbol;Acc:HGNC:8713]	AFFY_PRIMEVIEW
174	11716425_S_AT	174.22	ENSG00000240764	PCDHGC5	protocadherin gamma subfamily C, 5 [Source:HGNC Symbol;Acc:HGNC:8718]	AFFY_PRIMEVIEW
175	11716447_S_AT	175.1	ENSG00000093010	COMT	catechol-O-methyltransferase [Source:HGNC Symbol;Acc:HGNC:2228]	AFFY_PRIMEVIEW
176	11716459_AT	176.1	ENSG00000127824	TUBA4A	tubulin alpha 4a [Source:HGNC Symbol;Acc:HGNC:12407]	AFFY_PRIMEVIEW
177	11716460_X_AT	177.1	ENSG00000127824	TUBA4A	tubulin alpha 4a [Source:HGNC Symbol;Acc:HGNC:12407]	AFFY_PRIMEVIEW
178	11716476_A_AT	178.1	ENSG00000155506	LARP1	La ribonucleoprotein domain family member 1 [Source:HGNC Symbol;Acc:HGNC:29531]	AFFY_PRIMEVIEW
179	11716478_S_AT	179.1	ENSG00000155506	LARP1	La ribonucleoprotein domain family member 1 [Source:HGNC Symbol;Acc:HGNC:29531]	AFFY_PRIMEVIEW
180	11716489_A_AT	180.1	ENSG00000126549	STATH	statherin [Source:HGNC Symbol;Acc:HGNC:11369]	AFFY_PRIMEVIEW
181	11716512_A_AT	181.1	ENSG00000167978	SRRM2	serine/arginine repetitive matrix 2 [Source:HGNC Symbol;Acc:HGNC:16639]	AFFY_PRIMEVIEW
182	11716517_X_AT	182.1	ENSG00000087274	ADD1	adducin 1 [Source:HGNC Symbol;Acc:HGNC:243]	AFFY_PRIMEVIEW
183	11716520_AT	183.1	ENSG00000165507	DEPP1	DEPP1, autophagy regulator [Source:HGNC Symbol;Acc:HGNC:23355]	AFFY_PRIMEVIEW
184	11716522_X_AT	184.1	ENSG00000165507	DEPP1	DEPP1, autophagy regulator [Source:HGNC Symbol;Acc:HGNC:23355]	AFFY_PRIMEVIEW
185	11716524_A_AT	185.1	ENSG00000143256	PFDN2	prefoldin subunit 2 [Source:HGNC Symbol;Acc:HGNC:8867]	AFFY_PRIMEVIEW
186	11716525_A_AT	186.1	ENSG00000159674	SPON2	spondin 2 [Source:HGNC Symbol;Acc:HGNC:11253]	AFFY_PRIMEVIEW
187	11716526_X_AT	187.1	ENSG00000159674	SPON2	spondin 2 [Source:HGNC Symbol;Acc:HGNC:11253]	AFFY_PRIMEVIEW
188	11716528_AT	188.1	ENSG00000066044	ELAVL1	ELAV like RNA binding protein 1 [Source:HGNC Symbol;Acc:HGNC:3312]	AFFY_PRIMEVIEW
189	11716534_S_AT	189.1	ENSG00000131238	PPT1	palmitoyl-protein thioesterase 1 [Source:HGNC Symbol;Acc:HGNC:9325]	AFFY_PRIMEVIEW
190	11716543_A_AT	190.1	ENSG00000159173	TNNI1	troponin I1, slow skeletal type [Source:HGNC Symbol;Acc:HGNC:11945]	AFFY_PRIMEVIEW
191	11716552_A_AT	191.1	ENSG00000137821	LRRC49	leucine rich repeat containing 49 [Source:HGNC Symbol;Acc:HGNC:25965]	AFFY_PRIMEVIEW
192	11716555_AT	192.1	ENSG00000157778	PSMG3	proteasome assembly chaperone 3 [Source:HGNC Symbol;Acc:HGNC:22420]	AFFY_PRIMEVIEW
193	11716569_AT	193.1	ENSG00000074181	NOTCH3	notch 3 [Source:HGNC Symbol;Acc:HGNC:7883]	AFFY_PRIMEVIEW
194	11716571_AT	194.1	ENSG00000132383	RPA1	replication protein A1 [Source:HGNC Symbol;Acc:HGNC:10289]	AFFY_PRIMEVIEW
195	11716574_AT	195.1	ENSG00000115548	KDM3A	lysine demethylase 3A [Source:HGNC Symbol;Acc:HGNC:20815]	AFFY_PRIMEVIEW
196	11716578_AT	196.1	ENSG00000170876	TMEM43	transmembrane protein 43 [Source:HGNC Symbol;Acc:HGNC:28472]	AFFY_PRIMEVIEW
197	11716588_AT	197.1	ENSG00000134851	TMEM165	transmembrane protein 165 [Source:HGNC Symbol;Acc:HGNC:30760]	AFFY_PRIMEVIEW
198	11716612_A_AT	198.1	ENSG00000161204	ABCF3	ATP binding cassette subfamily F member 3 [Source:HGNC Symbol;Acc:HGNC:72]	AFFY_PRIMEVIEW
199	11716629_AT	199.1	ENSG00000162783	IER5	immediate early response 5 [Source:HGNC Symbol;Acc:HGNC:5393]	AFFY_PRIMEVIEW
200	11716630_A_AT	200.1	ENSG00000167772	ANGPTL4	angiopoietin like 4 [Source:HGNC Symbol;Acc:HGNC:16039]	AFFY_PRIMEVIEW
201	11716636_A_AT	201.1	ENSG00000090861	AARS	alanyl-tRNA synthetase [Source:HGNC Symbol;Acc:HGNC:20]	AFFY_PRIMEVIEW
202	11716638_S_AT	202.1	ENSG00000187498	COL4A1	collagen type IV alpha 1 chain [Source:HGNC Symbol;Acc:HGNC:2202]	AFFY_PRIMEVIEW
203	11716639_A_AT	203.1	ENSG00000187498	COL4A1	collagen type IV alpha 1 chain [Source:HGNC Symbol;Acc:HGNC:2202]	AFFY_PRIMEVIEW
204	11716647_X_AT	204.1	ENSG00000101294	HM13	histocompatibility minor 13 [Source:HGNC Symbol;Acc:HGNC:16435]	AFFY_PRIMEVIEW
205	11716649_A_AT	205.1	ENSG00000108406	DHX40	DEAH-box helicase 40 [Source:HGNC Symbol;Acc:HGNC:18018]	AFFY_PRIMEVIEW
206	11716651_A_AT	206.1	ENSG00000159202	UBE2Z	ubiquitin conjugating enzyme E2 Z [Source:HGNC Symbol;Acc:HGNC:25847]	AFFY_PRIMEVIEW
207	11716653_X_AT	207.1	ENSG00000143924	EML4	echinoderm microtubule associated protein like 4 [Source:HGNC Symbol;Acc:HGNC:1316]	AFFY_PRIMEVIEW
208	11716655_A_AT	208.1	ENSG00000076604	TRAF4	TNF receptor associated factor 4 [Source:HGNC Symbol;Acc:HGNC:12034]	AFFY_PRIMEVIEW
209	11716656_X_AT	209.1	ENSG00000076604	TRAF4	TNF receptor associated factor 4 [Source:HGNC Symbol;Acc:HGNC:12034]	AFFY_PRIMEVIEW
210	11716665_S_AT	210.1	ENSG00000130513	GDF15	growth differentiation factor 15 [Source:HGNC Symbol;Acc:HGNC:30142]	AFFY_PRIMEVIEW
210	11716665_S_AT	210.2	ENSG00000264175	MIR3189	microRNA 3189 [Source:HGNC Symbol;Acc:HGNC:38307]	AFFY_PRIMEVIEW
211	11716679_S_AT	211.1	ENSG00000029364	SLC39A9	solute carrier family 39 member 9 [Source:HGNC Symbol;Acc:HGNC:20182]	AFFY_PRIMEVIEW
212	11716690_X_AT	212.1	ENSG00000090615	GOLGA3	golgin A3 [Source:HGNC Symbol;Acc:HGNC:4426]	AFFY_PRIMEVIEW
213	11716710_A_AT	213.1	ENSG00000148926	ADM	adrenomedullin [Source:HGNC Symbol;Acc:HGNC:259]	AFFY_PRIMEVIEW
214	11716716_X_AT	214.1	ENSG00000164733	CTSB	cathepsin B [Source:HGNC Symbol;Acc:HGNC:2527]	AFFY_PRIMEVIEW
215	11716717_A_AT	215.1	ENSG00000131669	NINJ1	ninjurin 1 [Source:HGNC Symbol;Acc:HGNC:7824]	AFFY_PRIMEVIEW
216	11716719_S_AT	216.1	ENSG00000102393	GLA	galactosidase alpha [Source:HGNC Symbol;Acc:HGNC:4296]	AFFY_PRIMEVIEW
217	11716731_A_AT	217.1	ENSG00000162032	SPSB3	splA/ryanodine receptor domain and SOCS box containing 3 [Source:HGNC Symbol;Acc:HGNC:30629]	AFFY_PRIMEVIEW
218	11716746_A_AT	218.1	ENSG00000275097	AC024940.6	N/A	AFFY_PRIMEVIEW
218	11716746_A_AT	218.2	ENSG00000139146	SINHCAF	SIN3-HDAC complex associated factor [Source:HGNC Symbol;Acc:HGNC:30702]	AFFY_PRIMEVIEW
219	11716748_AT	219.1	ENSG00000172493	AFF1	AF4/FMR2 family member 1 [Source:HGNC Symbol;Acc:HGNC:7135]	AFFY_PRIMEVIEW
220	11716753_X_AT	220.1	ENSG00000135677	GNS	glucosamine (N-acetyl)-6-sulfatase [Source:HGNC Symbol;Acc:HGNC:4422]	AFFY_PRIMEVIEW
221	11716759_A_AT	221.1	ENSG00000196954	CASP4	caspase 4 [Source:HGNC Symbol;Acc:HGNC:1505]	AFFY_PRIMEVIEW
222	11716760_X_AT	222.1	ENSG00000196954	CASP4	caspase 4 [Source:HGNC Symbol;Acc:HGNC:1505]	AFFY_PRIMEVIEW
223	11716770_AT	223.1	ENSG00000085872	CHERP	calcium homeostasis endoplasmic reticulum protein [Source:HGNC Symbol;Acc:HGNC:16930]	AFFY_PRIMEVIEW
224	11716772_AT	224.1	ENSG00000175573	C11ORF68	chromosome 11 open reading frame 68 [Source:HGNC Symbol;Acc:HGNC:28801]	AFFY_PRIMEVIEW
225	11716797_S_AT	225.1	ENSG00000143815	LBR	lamin B receptor [Source:HGNC Symbol;Acc:HGNC:6518]	AFFY_PRIMEVIEW
226	11716809_A_AT	226.1	ENSG00000130177	CDC16	cell division cycle 16 [Source:HGNC Symbol;Acc:HGNC:1720]	AFFY_PRIMEVIEW
227	11716810_A_AT	227.1	ENSG00000127511	SIN3B	SIN3 transcription regulator family member B [Source:HGNC Symbol;Acc:HGNC:19354]	AFFY_PRIMEVIEW
228	11716812_X_AT	228.1	ENSG00000127511	SIN3B	SIN3 transcription regulator family member B [Source:HGNC Symbol;Acc:HGNC:19354]	AFFY_PRIMEVIEW
229	11716815_AT	229.1	ENSG00000117394	SLC2A1	solute carrier family 2 member 1 [Source:HGNC Symbol;Acc:HGNC:11005]	AFFY_PRIMEVIEW
230	11716820_X_AT	230.1	ENSG00000204983	PRSS1	serine protease 1 [Source:HGNC Symbol;Acc:HGNC:9475]	AFFY_PRIMEVIEW
231	11716832_S_AT	231.1	N/A	N/A	N/A	N/A
232	11716860_AT	232.1	ENSG00000131788	PIAS3	protein inhibitor of activated STAT 3 [Source:HGNC Symbol;Acc:HGNC:16861]	AFFY_PRIMEVIEW
233	11716865_A_AT	233.1	ENSG00000105281	SLC1A5	solute carrier family 1 member 5 [Source:HGNC Symbol;Acc:HGNC:10943]	AFFY_PRIMEVIEW
234	11716866_X_AT	234.1	ENSG00000105281	SLC1A5	solute carrier family 1 member 5 [Source:HGNC Symbol;Acc:HGNC:10943]	AFFY_PRIMEVIEW
235	11716871_AT	235.1	ENSG00000171298	GAA	glucosidase alpha, acid [Source:HGNC Symbol;Acc:HGNC:4065]	AFFY_PRIMEVIEW
236	11716874_X_AT	236.1	ENSG00000227057	WDR46	WD repeat domain 46 [Source:HGNC Symbol;Acc:HGNC:13923]	AFFY_PRIMEVIEW
237	11716876_A_AT	237.1	ENSG00000104522	TSTA3	tissue specific transplantation antigen P35B [Source:HGNC Symbol;Acc:HGNC:12390]	AFFY_PRIMEVIEW
238	11716897_X_AT	238.1	ENSG00000084072	PPIE	peptidylprolyl isomerase E [Source:HGNC Symbol;Acc:HGNC:9258]	AFFY_PRIMEVIEW
239	11716916_A_AT	239.1	ENSG00000161395	PGAP3	post-GPI attachment to proteins 3 [Source:HGNC Symbol;Acc:HGNC:23719]	AFFY_PRIMEVIEW
240	11716921_A_AT	240.1	ENSG00000105472	CLEC11A	C-type lectin domain containing 11A [Source:HGNC Symbol;Acc:HGNC:10576]	AFFY_PRIMEVIEW
241	11716922_X_AT	241.1	ENSG00000105472	CLEC11A	C-type lectin domain containing 11A [Source:HGNC Symbol;Acc:HGNC:10576]	AFFY_PRIMEVIEW
242	11716925_AT	242.1	ENSG00000146676	PURB	purine rich element binding protein B [Source:HGNC Symbol;Acc:HGNC:9702]	AFFY_PRIMEVIEW
243	11716960_A_AT	243.1	ENSG00000071889	FAM3A	family with sequence similarity 3 member A [Source:HGNC Symbol;Acc:HGNC:13749]	AFFY_PRIMEVIEW
244	11716961_X_AT	244.1	ENSG00000071889	FAM3A	family with sequence similarity 3 member A [Source:HGNC Symbol;Acc:HGNC:13749]	AFFY_PRIMEVIEW
245	11716963_A_AT	245.1	ENSG00000100034	PPM1F	protein phosphatase, Mg2+/Mn2+ dependent 1F [Source:HGNC Symbol;Acc:HGNC:19388]	AFFY_PRIMEVIEW
246	11716968_A_AT	246.1	ENSG00000118257	NRP2	neuropilin 2 [Source:HGNC Symbol;Acc:HGNC:8005]	AFFY_PRIMEVIEW
247	11716971_A_AT	247.1	ENSG00000158186	MRAS	muscle RAS oncogene homolog [Source:HGNC Symbol;Acc:HGNC:7227]	AFFY_PRIMEVIEW
248	11716982_AT	248.1	ENSG00000184220	CMSS1	cms1 ribosomal small subunit homolog (yeast) [Source:HGNC Symbol;Acc:HGNC:28666]	AFFY_PRIMEVIEW
249	11717002_A_AT	249.1	ENSG00000083896	YTHDC1	YTH domain containing 1 [Source:HGNC Symbol;Acc:HGNC:30626]	AFFY_PRIMEVIEW
250	11717029_A_AT	250.1	ENSG00000163930	BAP1	BRCA1 associated protein 1 [Source:HGNC Symbol;Acc:HGNC:950]	AFFY_PRIMEVIEW
251	11717030_X_AT	251.1	ENSG00000175115	PACS1	phosphofurin acidic cluster sorting protein 1 [Source:HGNC Symbol;Acc:HGNC:30032]	AFFY_PRIMEVIEW
252	11717036_A_AT	252.1	ENSG00000108840	HDAC5	histone deacetylase 5 [Source:HGNC Symbol;Acc:HGNC:14068]	AFFY_PRIMEVIEW
253	11717042_AT	253.1	ENSG00000101193	GID8	GID complex subunit 8 homolog [Source:HGNC Symbol;Acc:HGNC:15857]	AFFY_PRIMEVIEW
254	11717051_S_AT	254.1	ENSG00000124783	SSR1	signal sequence receptor subunit 1 [Source:HGNC Symbol;Acc:HGNC:11323]	AFFY_PRIMEVIEW
255	11717054_A_AT	255.1	ENSG00000124783	SSR1	signal sequence receptor subunit 1 [Source:HGNC Symbol;Acc:HGNC:11323]	AFFY_PRIMEVIEW
256	11717055_A_AT	256.1	ENSG00000110880	CORO1C	coronin 1C [Source:HGNC Symbol;Acc:HGNC:2254]	AFFY_PRIMEVIEW
257	11717065_A_AT	257.1	ENSG00000166923	GREM1	gremlin 1, DAN family BMP antagonist [Source:HGNC Symbol;Acc:HGNC:2001]	AFFY_PRIMEVIEW
258	11717080_X_AT	258.1	ENSG00000223501	VPS52	VPS52, GARP complex subunit [Source:HGNC Symbol;Acc:HGNC:10518]	AFFY_PRIMEVIEW
259	11717081_A_AT	259.1	ENSG00000223501	VPS52	VPS52, GARP complex subunit [Source:HGNC Symbol;Acc:HGNC:10518]	AFFY_PRIMEVIEW
260	11717096_A_AT	260.1	ENSG00000120694	HSPH1	heat shock protein family H (Hsp110) member 1 [Source:HGNC Symbol;Acc:HGNC:16969]	AFFY_PRIMEVIEW
261	11717097_A_AT	261.1	ENSG00000173418	NAA20	N(alpha)-acetyltransferase 20, NatB catalytic subunit [Source:HGNC Symbol;Acc:HGNC:15908]	AFFY_PRIMEVIEW
262	11717121_X_AT	262.1	ENSG00000196821	C6ORF106	chromosome 6 open reading frame 106 [Source:HGNC Symbol;Acc:HGNC:21215]	AFFY_PRIMEVIEW
263	11717124_AT	263.1	ENSG00000107957	SH3PXD2A	SH3 and PX domains 2A [Source:HGNC Symbol;Acc:HGNC:23664]	AFFY_PRIMEVIEW
264	11717126_AT	264.1	ENSG00000107957	SH3PXD2A	SH3 and PX domains 2A [Source:HGNC Symbol;Acc:HGNC:23664]	AFFY_PRIMEVIEW
265	11717128_A_AT	265.1	ENSG00000260007	AC107871.1	N/A	AFFY_PRIMEVIEW
265	11717128_A_AT	265.2	ENSG00000128973	CLN6	CLN6, transmembrane ER protein [Source:HGNC Symbol;Acc:HGNC:2077]	AFFY_PRIMEVIEW
266	11717136_X_AT	266.1	ENSG00000102109	PCSK1N	proprotein convertase subtilisin/kexin type 1 inhibitor [Source:HGNC Symbol;Acc:HGNC:17301]	AFFY_PRIMEVIEW
267	11717148_S_AT	267.1	ENSG00000211450	SELENOH	selenoprotein H [Source:HGNC Symbol;Acc:HGNC:18251]	AFFY_PRIMEVIEW
267	11717148_S_AT	267.2	ENSG00000254732	AP001931.1	N/A	AFFY_PRIMEVIEW
268	11717153_A_AT	268.1	ENSG00000101474	APMAP	adipocyte plasma membrane associated protein [Source:HGNC Symbol;Acc:HGNC:13238]	AFFY_PRIMEVIEW
269	11717158_AT	269.1	ENSG00000142684	ZNF593	zinc finger protein 593 [Source:HGNC Symbol;Acc:HGNC:30943]	AFFY_PRIMEVIEW
270	11717165_A_AT	270.1	ENSG00000100401	RANGAP1	Ran GTPase activating protein 1 [Source:HGNC Symbol;Acc:HGNC:9854]	AFFY_PRIMEVIEW
271	11717169_A_AT	271.1	ENSG00000100991	TRPC4AP	transient receptor potential cation channel subfamily C member 4 associated protein [Source:HGNC Symbol;Acc:HGNC:16181]	AFFY_PRIMEVIEW
272	11717172_A_AT	272.1	ENSG00000129473	BCL2L2	BCL2 like 2 [Source:HGNC Symbol;Acc:HGNC:995]	AFFY_PRIMEVIEW
273	11717174_A_AT	273.1	ENSG00000097007	ABL1	ABL proto-oncogene 1, non-receptor tyrosine kinase [Source:HGNC Symbol;Acc:HGNC:76]	AFFY_PRIMEVIEW
274	11717196_A_AT	274.1	ENSG00000106484	MEST	mesoderm specific transcript [Source:HGNC Symbol;Acc:HGNC:7028]	AFFY_PRIMEVIEW
275	11717206_A_AT	275.1	ENSG00000167110	GOLGA2	golgin A2 [Source:HGNC Symbol;Acc:HGNC:4425]	AFFY_PRIMEVIEW
276	11717215_A_AT	276.1	ENSG00000054793	ATP9A	ATPase phospholipid transporting 9A (putative) [Source:HGNC Symbol;Acc:HGNC:13540]	AFFY_PRIMEVIEW
277	11717224_S_AT	277.1	ENSG00000012232	EXTL3	exostosin like glycosyltransferase 3 [Source:HGNC Symbol;Acc:HGNC:3518]	AFFY_PRIMEVIEW
278	11717228_AT	278.1	ENSG00000140743	CDR2	cerebellar degeneration related protein 2 [Source:HGNC Symbol;Acc:HGNC:1799]	AFFY_PRIMEVIEW
279	11717235_S_AT	279.1	ENSG00000229133	RPS7P4	ribosomal protein S7 pseudogene 4 [Source:HGNC Symbol;Acc:HGNC:36000]	AFFY_PRIMEVIEW
279	11717235_S_AT	279.2	ENSG00000263266	RPS7P1	ribosomal protein S7 pseudogene 1 [Source:HGNC Symbol;Acc:HGNC:17081]	AFFY_PRIMEVIEW
279	11717235_S_AT	279.3	ENSG00000213326	RPS7P11	ribosomal protein S7 pseudogene 11 [Source:HGNC Symbol;Acc:HGNC:35841]	AFFY_PRIMEVIEW
279	11717235_S_AT	279.4	ENSG00000171863	RPS7	ribosomal protein S7 [Source:HGNC Symbol;Acc:HGNC:10440]	AFFY_PRIMEVIEW
279	11717235_S_AT	279.5	ENSG00000226525	RPS7P10	ribosomal protein S7 pseudogene 10 [Source:HGNC Symbol;Acc:HGNC:39903]	AFFY_PRIMEVIEW
280	11717254_AT	280.1	ENSG00000170606	HSPA4	heat shock protein family A (Hsp70) member 4 [Source:HGNC Symbol;Acc:HGNC:5237]	AFFY_PRIMEVIEW
281	11717255_X_AT	281.1	ENSG00000170606	HSPA4	heat shock protein family A (Hsp70) member 4 [Source:HGNC Symbol;Acc:HGNC:5237]	AFFY_PRIMEVIEW
282	11717257_S_AT	282.1	ENSG00000137193	PIM1	Pim-1 proto-oncogene, serine/threonine kinase [Source:HGNC Symbol;Acc:HGNC:8986]	AFFY_PRIMEVIEW
283	11717272_AT	283.1	ENSG00000130635	COL5A1	collagen type V alpha 1 chain [Source:HGNC Symbol;Acc:HGNC:2209]	AFFY_PRIMEVIEW
284	11717273_AT	284.1	ENSG00000130635	COL5A1	collagen type V alpha 1 chain [Source:HGNC Symbol;Acc:HGNC:2209]	AFFY_PRIMEVIEW
285	11717274_S_AT	285.1	ENSG00000130635	COL5A1	collagen type V alpha 1 chain [Source:HGNC Symbol;Acc:HGNC:2209]	AFFY_PRIMEVIEW
286	11717275_S_AT	286.1	ENSG00000130635	COL5A1	collagen type V alpha 1 chain [Source:HGNC Symbol;Acc:HGNC:2209]	AFFY_PRIMEVIEW
287	11717277_A_AT	287.1	ENSG00000054118	THRAP3	thyroid hormone receptor associated protein 3 [Source:HGNC Symbol;Acc:HGNC:22964]	AFFY_PRIMEVIEW
288	11717278_S_AT	288.1	ENSG00000054118	THRAP3	thyroid hormone receptor associated protein 3 [Source:HGNC Symbol;Acc:HGNC:22964]	AFFY_PRIMEVIEW
289	11717280_A_AT	289.1	ENSG00000167118	URM1	ubiquitin related modifier 1 [Source:HGNC Symbol;Acc:HGNC:28378]	AFFY_PRIMEVIEW
290	11717287_A_AT	290.1	ENSG00000143442	POGZ	pogo transposable element derived with ZNF domain [Source:HGNC Symbol;Acc:HGNC:18801]	AFFY_PRIMEVIEW
291	11717310_A_AT	291.1	ENSG00000163938	GNL3	G protein nucleolar 3 [Source:HGNC Symbol;Acc:HGNC:29931]	AFFY_PRIMEVIEW
291	11717310_A_AT	291.2	ENSG00000212452	SNORD69	small nucleolar RNA, C/D box 69 [Source:HGNC Symbol;Acc:HGNC:32730]	AFFY_PRIMEVIEW
292	11717315_A_AT	292.1	ENSG00000125821	DTD1	D-tyrosyl-tRNA deacylase 1 [Source:HGNC Symbol;Acc:HGNC:16219]	AFFY_PRIMEVIEW
293	11717330_AT	293.1	ENSG00000165733	BMS1	BMS1, ribosome biogenesis factor [Source:HGNC Symbol;Acc:HGNC:23505]	AFFY_PRIMEVIEW
294	11717331_X_AT	294.1	ENSG00000165733	BMS1	BMS1, ribosome biogenesis factor [Source:HGNC Symbol;Acc:HGNC:23505]	AFFY_PRIMEVIEW
295	11717335_AT	295.1	ENSG00000204713	TRIM27	tripartite motif containing 27 [Source:HGNC Symbol;Acc:HGNC:9975]	AFFY_PRIMEVIEW
296	11717336_A_AT	296.1	ENSG00000004534	RBM6	RNA binding motif protein 6 [Source:HGNC Symbol;Acc:HGNC:9903]	AFFY_PRIMEVIEW
297	11717349_A_AT	297.1	ENSG00000114115	RBP1	retinol binding protein 1 [Source:HGNC Symbol;Acc:HGNC:9919]	AFFY_PRIMEVIEW
298	11717350_AT	298.1	ENSG00000025770	NCAPH2	non-SMC condensin II complex subunit H2 [Source:HGNC Symbol;Acc:HGNC:25071]	AFFY_PRIMEVIEW
299	11717360_S_AT	299.1	ENSG00000089154	GCN1	GCN1, eIF2 alpha kinase activator homolog [Source:HGNC Symbol;Acc:HGNC:4199]	AFFY_PRIMEVIEW
300	11717361_A_AT	300.1	ENSG00000063660	GPC1	glypican 1 [Source:HGNC Symbol;Acc:HGNC:4449]	AFFY_PRIMEVIEW
301	11717364_A_AT	301.1	ENSG00000126453	BCL2L12	BCL2 like 12 [Source:HGNC Symbol;Acc:HGNC:13787]	AFFY_PRIMEVIEW
302	11717365_X_AT	302.1	ENSG00000101400	SNTA1	syntrophin alpha 1 [Source:HGNC Symbol;Acc:HGNC:11167]	AFFY_PRIMEVIEW
303	11717376_A_AT	303.1	ENSG00000148339	SLC25A25	solute carrier family 25 member 25 [Source:HGNC Symbol;Acc:HGNC:20663]	AFFY_PRIMEVIEW
304	11717379_A_AT	304.1	ENSG00000179950	PUF60	poly(U) binding splicing factor 60 [Source:HGNC Symbol;Acc:HGNC:17042]	AFFY_PRIMEVIEW
305	11717398_AT	305.1	ENSG00000170260	ZNF212	zinc finger protein 212 [Source:HGNC Symbol;Acc:HGNC:13004]	AFFY_PRIMEVIEW
306	11717400_A_AT	306.1	ENSG00000103876	FAH	fumarylacetoacetate hydrolase [Source:HGNC Symbol;Acc:HGNC:3579]	AFFY_PRIMEVIEW
307	11717414_A_AT	307.1	ENSG00000167965	MLST8	MTOR associated protein, LST8 homolog [Source:HGNC Symbol;Acc:HGNC:24825]	AFFY_PRIMEVIEW
308	11717415_X_AT	308.1	ENSG00000167965	MLST8	MTOR associated protein, LST8 homolog [Source:HGNC Symbol;Acc:HGNC:24825]	AFFY_PRIMEVIEW
309	11717419_A_AT	309.1	ENSG00000119661	DNAL1	dynein axonemal light chain 1 [Source:HGNC Symbol;Acc:HGNC:23247]	AFFY_PRIMEVIEW
310	11717438_X_AT	310.1	ENSG00000198900	TOP1	DNA topoisomerase I [Source:HGNC Symbol;Acc:HGNC:11986]	AFFY_PRIMEVIEW
311	11717444_AT	311.1	ENSG00000112578	BYSL	bystin like [Source:HGNC Symbol;Acc:HGNC:1157]	AFFY_PRIMEVIEW
312	11717445_A_AT	312.1	ENSG00000095059	DHPS	deoxyhypusine synthase [Source:HGNC Symbol;Acc:HGNC:2869]	AFFY_PRIMEVIEW
313	11717450_A_AT	313.1	ENSG00000151414	NEK7	NIMA related kinase 7 [Source:HGNC Symbol;Acc:HGNC:13386]	AFFY_PRIMEVIEW
314	11717455_AT	314.1	ENSG00000107742	SPOCK2	SPARC (osteonectin), cwcv and kazal like domains proteoglycan 2 [Source:HGNC Symbol;Acc:HGNC:13564]	AFFY_PRIMEVIEW
315	11717462_S_AT	315.1	ENSG00000037474	NSUN2	NOP2/Sun RNA methyltransferase family member 2 [Source:HGNC Symbol;Acc:HGNC:25994]	AFFY_PRIMEVIEW
316	11717471_AT	316.1	ENSG00000154229	PRKCA	protein kinase C alpha [Source:HGNC Symbol;Acc:HGNC:9393]	AFFY_PRIMEVIEW
317	11717474_A_AT	317.1	ENSG00000089199	CHGB	chromogranin B [Source:HGNC Symbol;Acc:HGNC:1930]	AFFY_PRIMEVIEW
318	11717491_A_AT	318.1	ENSG00000125971	DYNLRB1	dynein light chain roadblock-type 1 [Source:HGNC Symbol;Acc:HGNC:15468]	AFFY_PRIMEVIEW
319	11717492_X_AT	319.1	ENSG00000125971	DYNLRB1	dynein light chain roadblock-type 1 [Source:HGNC Symbol;Acc:HGNC:15468]	AFFY_PRIMEVIEW
320	11717511_A_AT	320.1	ENSG00000141076	UTP4	UTP4, small subunit processome component [Source:HGNC Symbol;Acc:HGNC:1983]	AFFY_PRIMEVIEW
321	11717517_S_AT	321.1	ENSG00000076043	REXO2	RNA exonuclease 2 [Source:HGNC Symbol;Acc:HGNC:17851]	AFFY_PRIMEVIEW
322	11717533_AT	322.1	ENSG00000196547	MAN2A2	mannosidase alpha class 2A member 2 [Source:HGNC Symbol;Acc:HGNC:6825]	AFFY_PRIMEVIEW
323	11717558_S_AT	323.1	ENSG00000196313	POM121	POM121 transmembrane nucleoporin [Source:HGNC Symbol;Acc:HGNC:19702]	AFFY_PRIMEVIEW
323	11717558_S_AT	323.2	ENSG00000272391	POM121C	POM121 transmembrane nucleoporin C [Source:HGNC Symbol;Acc:HGNC:34005]	AFFY_PRIMEVIEW
323	11717558_S_AT	323.3	ENSG00000205578	POM121B	POM121 transmembrane nucleoporin B (pseudogene) [Source:HGNC Symbol;Acc:HGNC:34004]	AFFY_PRIMEVIEW
324	11717567_A_AT	324.1	ENSG00000181019	NQO1	NAD(P)H quinone dehydrogenase 1 [Source:HGNC Symbol;Acc:HGNC:2874]	AFFY_PRIMEVIEW
325	11717571_A_AT	325.1	ENSG00000119203	CPSF3	cleavage and polyadenylation specific factor 3 [Source:HGNC Symbol;Acc:HGNC:2326]	AFFY_PRIMEVIEW
326	11717578_A_AT	326.1	ENSG00000122958	VPS26A	VPS26, retromer complex component A [Source:HGNC Symbol;Acc:HGNC:12711]	AFFY_PRIMEVIEW
327	11717584_A_AT	327.1	ENSG00000124164	VAPB	VAMP associated protein B and C [Source:HGNC Symbol;Acc:HGNC:12649]	AFFY_PRIMEVIEW
328	11717591_S_AT	328.1	ENSG00000125107	CNOT1	CCR4-NOT transcription complex subunit 1 [Source:HGNC Symbol;Acc:HGNC:7877]	AFFY_PRIMEVIEW
329	11717606_X_AT	329.1	ENSG00000205937	RNPS1	RNA binding protein with serine rich domain 1 [Source:HGNC Symbol;Acc:HGNC:10080]	AFFY_PRIMEVIEW
330	11717608_AT	330.1	ENSG00000160131	VMA21	VMA21, vacuolar ATPase assembly factor [Source:HGNC Symbol;Acc:HGNC:22082]	AFFY_PRIMEVIEW
331	11717609_A_AT	331.1	ENSG00000133895	MEN1	menin 1 [Source:HGNC Symbol;Acc:HGNC:7010]	AFFY_PRIMEVIEW
332	11717619_AT	332.1	ENSG00000142627	EPHA2	EPH receptor A2 [Source:HGNC Symbol;Acc:HGNC:3386]	AFFY_PRIMEVIEW
333	11717624_AT	333.1	ENSG00000106638	TBL2	transducin beta like 2 [Source:HGNC Symbol;Acc:HGNC:11586]	AFFY_PRIMEVIEW
334	11717625_A_AT	334.1	ENSG00000106638	TBL2	transducin beta like 2 [Source:HGNC Symbol;Acc:HGNC:11586]	AFFY_PRIMEVIEW
335	11717667_A_AT	335.1	ENSG00000014138	POLA2	DNA polymerase alpha 2, accessory subunit [Source:HGNC Symbol;Acc:HGNC:30073]	AFFY_PRIMEVIEW
336	11717675_X_AT	336.1	ENSG00000141873	SLC39A3	solute carrier family 39 member 3 [Source:HGNC Symbol;Acc:HGNC:17128]	AFFY_PRIMEVIEW
337	11717690_A_AT	337.1	ENSG00000160563	MED27	mediator complex subunit 27 [Source:HGNC Symbol;Acc:HGNC:2377]	AFFY_PRIMEVIEW
338	11717695_A_AT	338.1	ENSG00000156521	TYSND1	trypsin domain containing 1 [Source:HGNC Symbol;Acc:HGNC:28531]	AFFY_PRIMEVIEW
339	11717703_A_AT	339.1	ENSG00000140859	KIFC3	kinesin family member C3 [Source:HGNC Symbol;Acc:HGNC:6326]	AFFY_PRIMEVIEW
340	11717715_AT	340.1	ENSG00000075420	FNDC3B	fibronectin type III domain containing 3B [Source:HGNC Symbol;Acc:HGNC:24670]	AFFY_PRIMEVIEW
341	11717721_S_AT	341.1	ENSG00000073849	ST6GAL1	ST6 beta-galactoside alpha-2,6-sialyltransferase 1 [Source:HGNC Symbol;Acc:HGNC:10860]	AFFY_PRIMEVIEW
342	11717729_A_AT	342.1	ENSG00000104549	SQLE	squalene epoxidase [Source:HGNC Symbol;Acc:HGNC:11279]	AFFY_PRIMEVIEW
343	11717730_S_AT	343.1	ENSG00000104549	SQLE	squalene epoxidase [Source:HGNC Symbol;Acc:HGNC:11279]	AFFY_PRIMEVIEW
344	11717734_AT	344.1	ENSG00000165424	ZCCHC24	zinc finger CCHC-type containing 24 [Source:HGNC Symbol;Acc:HGNC:26911]	AFFY_PRIMEVIEW
345	11717736_A_AT	345.1	ENSG00000165424	ZCCHC24	zinc finger CCHC-type containing 24 [Source:HGNC Symbol;Acc:HGNC:26911]	AFFY_PRIMEVIEW
346	11717746_A_AT	346.1	ENSG00000145495	MARCH6	membrane associated ring-CH-type finger 6 [Source:HGNC Symbol;Acc:HGNC:30550]	AFFY_PRIMEVIEW
347	11717757_S_AT	347.1	ENSG00000006451	RALA	RAS like proto-oncogene A [Source:HGNC Symbol;Acc:HGNC:9839]	AFFY_PRIMEVIEW
347	11717757_S_AT	347.2	ENSG00000257564	AC068993.1	N/A	AFFY_PRIMEVIEW
348	11717772_A_AT	348.1	ENSG00000167770	OTUB1	OTU deubiquitinase, ubiquitin aldehyde binding 1 [Source:HGNC Symbol;Acc:HGNC:23077]	AFFY_PRIMEVIEW
349	11717779_AT	349.1	ENSG00000101452	DHX35	DEAH-box helicase 35 [Source:HGNC Symbol;Acc:HGNC:15861]	AFFY_PRIMEVIEW
350	11717781_A_AT	350.1	ENSG00000101452	DHX35	DEAH-box helicase 35 [Source:HGNC Symbol;Acc:HGNC:15861]	AFFY_PRIMEVIEW
351	11717786_X_AT	351.1	ENSG00000132361	CLUH	clustered mitochondria homolog [Source:HGNC Symbol;Acc:HGNC:29094]	AFFY_PRIMEVIEW
352	11717798_AT	352.1	ENSG00000160445	ZER1	zyg-11 related cell cycle regulator [Source:HGNC Symbol;Acc:HGNC:30960]	AFFY_PRIMEVIEW
353	11717817_A_AT	353.1	ENSG00000090905	TNRC6A	trinucleotide repeat containing 6A [Source:HGNC Symbol;Acc:HGNC:11969]	AFFY_PRIMEVIEW
354	11717819_A_AT	354.1	ENSG00000183864	TOB2	transducer of ERBB2, 2 [Source:HGNC Symbol;Acc:HGNC:11980]	AFFY_PRIMEVIEW
355	11717824_A_AT	355.1	ENSG00000185215	TNFAIP2	TNF alpha induced protein 2 [Source:HGNC Symbol;Acc:HGNC:11895]	AFFY_PRIMEVIEW
356	11717833_A_AT	356.1	ENSG00000136891	TEX10	testis expressed 10 [Source:HGNC Symbol;Acc:HGNC:25988]	AFFY_PRIMEVIEW
357	11717835_A_AT	357.1	ENSG00000090863	GLG1	golgi glycoprotein 1 [Source:HGNC Symbol;Acc:HGNC:4316]	AFFY_PRIMEVIEW
358	11717849_AT	358.1	ENSG00000198937	CCDC167	coiled-coil domain containing 167 [Source:HGNC Symbol;Acc:HGNC:21239]	AFFY_PRIMEVIEW
359	11717865_AT	359.1	ENSG00000068878	PSME4	proteasome activator subunit 4 [Source:HGNC Symbol;Acc:HGNC:20635]	AFFY_PRIMEVIEW
360	11717866_S_AT	360.1	ENSG00000068878	PSME4	proteasome activator subunit 4 [Source:HGNC Symbol;Acc:HGNC:20635]	AFFY_PRIMEVIEW
361	11717868_A_AT	361.1	ENSG00000006194	ZNF263	zinc finger protein 263 [Source:HGNC Symbol;Acc:HGNC:13056]	AFFY_PRIMEVIEW
362	11717869_AT	362.1	ENSG00000006194	ZNF263	zinc finger protein 263 [Source:HGNC Symbol;Acc:HGNC:13056]	AFFY_PRIMEVIEW
363	11717870_X_AT	363.1	ENSG00000006194	ZNF263	zinc finger protein 263 [Source:HGNC Symbol;Acc:HGNC:13056]	AFFY_PRIMEVIEW
364	11717880_A_AT	364.1	ENSG00000087152	ATXN7L3	ataxin 7 like 3 [Source:HGNC Symbol;Acc:HGNC:25416]	AFFY_PRIMEVIEW
365	11717898_A_AT	365.1	ENSG00000155229	MMS19	MMS19 homolog, cytosolic iron-sulfur assembly component [Source:HGNC Symbol;Acc:HGNC:13824]	AFFY_PRIMEVIEW
366	11717905_A_AT	366.1	ENSG00000124214	STAU1	staufen double-stranded RNA binding protein 1 [Source:HGNC Symbol;Acc:HGNC:11370]	AFFY_PRIMEVIEW
367	11717908_S_AT	367.1	ENSG00000035141	FAM136A	family with sequence similarity 136 member A [Source:HGNC Symbol;Acc:HGNC:25911]	AFFY_PRIMEVIEW
368	11717918_A_AT	368.1	ENSG00000087087	SRRT	serrate, RNA effector molecule [Source:HGNC Symbol;Acc:HGNC:24101]	AFFY_PRIMEVIEW
369	11717934_AT	369.1	ENSG00000100246	DNAL4	dynein axonemal light chain 4 [Source:HGNC Symbol;Acc:HGNC:2955]	AFFY_PRIMEVIEW
370	11717940_AT	370.1	ENSG00000063244	U2AF2	U2 small nuclear RNA auxiliary factor 2 [Source:HGNC Symbol;Acc:HGNC:23156]	AFFY_PRIMEVIEW
371	11717949_A_AT	371.1	N/A	N/A	N/A	N/A
372	11717951_A_AT	372.1	ENSG00000204160	ZDHHC18	zinc finger DHHC-type containing 18 [Source:HGNC Symbol;Acc:HGNC:20712]	AFFY_PRIMEVIEW
373	11717952_AT	373.1	ENSG00000204160	ZDHHC18	zinc finger DHHC-type containing 18 [Source:HGNC Symbol;Acc:HGNC:20712]	AFFY_PRIMEVIEW
374	11717954_S_AT	374.1	ENSG00000115275	MOGS	mannosyl-oligosaccharide glucosidase [Source:HGNC Symbol;Acc:HGNC:24862]	AFFY_PRIMEVIEW
375	11717955_A_AT	375.1	ENSG00000198648	STK39	serine/threonine kinase 39 [Source:HGNC Symbol;Acc:HGNC:17717]	AFFY_PRIMEVIEW
376	11717958_S_AT	376.1	ENSG00000166889	PATL1	PAT1 homolog 1, processing body mRNA decay factor [Source:HGNC Symbol;Acc:HGNC:26721]	AFFY_PRIMEVIEW
377	11717966_S_AT	377.1	ENSG00000198874	TYW1	tRNA-yW synthesizing protein 1 homolog [Source:HGNC Symbol;Acc:HGNC:25598]	AFFY_PRIMEVIEW
377	11717966_S_AT	377.2	ENSG00000277149	TYW1B	tRNA-yW synthesizing protein 1 homolog B [Source:HGNC Symbol;Acc:HGNC:33908]	AFFY_PRIMEVIEW
378	11717968_AT	378.1	ENSG00000187049	TMEM216	transmembrane protein 216 [Source:HGNC Symbol;Acc:HGNC:25018]	AFFY_PRIMEVIEW
379	11717976_X_AT	379.1	ENSG00000165819	METTL3	methyltransferase like 3 [Source:HGNC Symbol;Acc:HGNC:17563]	AFFY_PRIMEVIEW
380	11717999_AT	380.1	ENSG00000168303	MPLKIP	M-phase specific PLK1 interacting protein [Source:HGNC Symbol;Acc:HGNC:16002]	AFFY_PRIMEVIEW
381	11718000_X_AT	381.1	ENSG00000168303	MPLKIP	M-phase specific PLK1 interacting protein [Source:HGNC Symbol;Acc:HGNC:16002]	AFFY_PRIMEVIEW
382	11718005_A_AT	382.1	ENSG00000101224	CDC25B	cell division cycle 25B [Source:HGNC Symbol;Acc:HGNC:1726]	AFFY_PRIMEVIEW
383	11718006_A_AT	383.1	ENSG00000007944	MYLIP	myosin regulatory light chain interacting protein [Source:HGNC Symbol;Acc:HGNC:21155]	AFFY_PRIMEVIEW
384	11718010_AT	384.1	ENSG00000177542	SLC25A22	solute carrier family 25 member 22 [Source:HGNC Symbol;Acc:HGNC:19954]	AFFY_PRIMEVIEW
385	11718013_AT	385.1	ENSG00000185950	IRS2	insulin receptor substrate 2 [Source:HGNC Symbol;Acc:HGNC:6126]	AFFY_PRIMEVIEW
386	11718017_A_AT	386.1	ENSG00000197381	ADARB1	adenosine deaminase, RNA specific B1 [Source:HGNC Symbol;Acc:HGNC:226]	AFFY_PRIMEVIEW
387	11718018_A_AT	387.1	ENSG00000197381	ADARB1	adenosine deaminase, RNA specific B1 [Source:HGNC Symbol;Acc:HGNC:226]	AFFY_PRIMEVIEW
388	11718026_A_AT	388.1	ENSG00000111912	NCOA7	nuclear receptor coactivator 7 [Source:HGNC Symbol;Acc:HGNC:21081]	AFFY_PRIMEVIEW
389	11718027_A_AT	389.1	ENSG00000177192	PUS1	pseudouridylate synthase 1 [Source:HGNC Symbol;Acc:HGNC:15508]	AFFY_PRIMEVIEW
390	11718028_X_AT	390.1	ENSG00000177192	PUS1	pseudouridylate synthase 1 [Source:HGNC Symbol;Acc:HGNC:15508]	AFFY_PRIMEVIEW
391	11718042_AT	391.1	ENSG00000042429	MED17	mediator complex subunit 17 [Source:HGNC Symbol;Acc:HGNC:2375]	AFFY_PRIMEVIEW
392	11718064_A_AT	392.1	ENSG00000196154	S100A4	S100 calcium binding protein A4 [Source:HGNC Symbol;Acc:HGNC:10494]	AFFY_PRIMEVIEW
393	11718071_S_AT	393.1	ENSG00000196498	NCOR2	nuclear receptor corepressor 2 [Source:HGNC Symbol;Acc:HGNC:7673]	AFFY_PRIMEVIEW
394	11718077_S_AT	394.1	ENSG00000114738	MAPKAPK3	mitogen-activated protein kinase-activated protein kinase 3 [Source:HGNC Symbol;Acc:HGNC:6888]	AFFY_PRIMEVIEW
395	11718084_A_AT	395.1	ENSG00000254087	LYN	LYN proto-oncogene, Src family tyrosine kinase [Source:HGNC Symbol;Acc:HGNC:6735]	AFFY_PRIMEVIEW
396	11718090_A_AT	396.1	ENSG00000186815	TPCN1	two pore segment channel 1 [Source:HGNC Symbol;Acc:HGNC:18182]	AFFY_PRIMEVIEW
397	11718092_A_AT	397.1	ENSG00000134897	BIVM	basic, immunoglobulin-like variable motif containing [Source:HGNC Symbol;Acc:HGNC:16034]	AFFY_PRIMEVIEW
398	11718105_S_AT	398.1	ENSG00000065150	IPO5	importin 5 [Source:HGNC Symbol;Acc:HGNC:6402]	AFFY_PRIMEVIEW
399	11718106_S_AT	399.1	ENSG00000065150	IPO5	importin 5 [Source:HGNC Symbol;Acc:HGNC:6402]	AFFY_PRIMEVIEW
400	11718137_A_AT	400.1	ENSG00000160209	PDXK	pyridoxal kinase [Source:HGNC Symbol;Acc:HGNC:8819]	AFFY_PRIMEVIEW
401	11718138_AT	401.1	ENSG00000160209	PDXK	pyridoxal kinase [Source:HGNC Symbol;Acc:HGNC:8819]	AFFY_PRIMEVIEW
402	11718139_AT	402.1	ENSG00000160209	PDXK	pyridoxal kinase [Source:HGNC Symbol;Acc:HGNC:8819]	AFFY_PRIMEVIEW
403	11718186_A_AT	403.1	ENSG00000147854	UHRF2	ubiquitin like with PHD and ring finger domains 2 [Source:HGNC Symbol;Acc:HGNC:12557]	AFFY_PRIMEVIEW
404	11718203_A_AT	404.1	ENSG00000214736	TOMM6	translocase of outer mitochondrial membrane 6 [Source:HGNC Symbol;Acc:HGNC:34528]	AFFY_PRIMEVIEW
404	11718203_A_AT	404.2	ENSG00000124593	AL365205.1	N/A	AFFY_PRIMEVIEW
405	11718204_A_AT	405.1	ENSG00000100918	REC8	REC8 meiotic recombination protein [Source:HGNC Symbol;Acc:HGNC:16879]	AFFY_PRIMEVIEW
406	11718210_S_AT	406.1	ENSG00000183010	PYCR1	pyrroline-5-carboxylate reductase 1 [Source:HGNC Symbol;Acc:HGNC:9721]	AFFY_PRIMEVIEW
407	11718212_X_AT	407.1	ENSG00000183010	PYCR1	pyrroline-5-carboxylate reductase 1 [Source:HGNC Symbol;Acc:HGNC:9721]	AFFY_PRIMEVIEW
408	11718242_A_AT	408.1	ENSG00000106772	PRUNE2	prune homolog 2 [Source:HGNC Symbol;Acc:HGNC:25209]	AFFY_PRIMEVIEW
409	11718264_A_AT	409.1	ENSG00000278540	ACACA	acetyl-CoA carboxylase alpha [Source:HGNC Symbol;Acc:HGNC:84]	AFFY_PRIMEVIEW
410	11718276_X_AT	410.1	ENSG00000214706	IFRD2	interferon related developmental regulator 2 [Source:HGNC Symbol;Acc:HGNC:5457]	AFFY_PRIMEVIEW
411	11718283_A_AT	411.1	ENSG00000187840	EIF4EBP1	eukaryotic translation initiation factor 4E binding protein 1 [Source:HGNC Symbol;Acc:HGNC:3288]	AFFY_PRIMEVIEW
412	11718284_X_AT	412.1	ENSG00000187840	EIF4EBP1	eukaryotic translation initiation factor 4E binding protein 1 [Source:HGNC Symbol;Acc:HGNC:3288]	AFFY_PRIMEVIEW
413	11718289_A_AT	413.1	ENSG00000113108	APBB3	amyloid beta precursor protein binding family B member 3 [Source:HGNC Symbol;Acc:HGNC:20708]	AFFY_PRIMEVIEW
414	11718297_A_AT	414.1	ENSG00000013810	TACC3	transforming acidic coiled-coil containing protein 3 [Source:HGNC Symbol;Acc:HGNC:11524]	AFFY_PRIMEVIEW
415	11718303_A_AT	415.1	ENSG00000079462	PAFAH1B3	platelet activating factor acetylhydrolase 1b catalytic subunit 3 [Source:HGNC Symbol;Acc:HGNC:8576]	AFFY_PRIMEVIEW
416	11718313_AT	416.1	ENSG00000120256	LRP11	LDL receptor related protein 11 [Source:HGNC Symbol;Acc:HGNC:16936]	AFFY_PRIMEVIEW
417	11718314_X_AT	417.1	ENSG00000120256	LRP11	LDL receptor related protein 11 [Source:HGNC Symbol;Acc:HGNC:16936]	AFFY_PRIMEVIEW
418	11718321_AT	418.1	ENSG00000125810	CD93	CD93 molecule [Source:HGNC Symbol;Acc:HGNC:15855]	AFFY_PRIMEVIEW
419	11718326_AT	419.1	ENSG00000047644	WWC3	WWC family member 3 [Source:HGNC Symbol;Acc:HGNC:29237]	AFFY_PRIMEVIEW
420	11718327_A_AT	420.1	ENSG00000047644	WWC3	WWC family member 3 [Source:HGNC Symbol;Acc:HGNC:29237]	AFFY_PRIMEVIEW
421	11718331_A_AT	421.1	ENSG00000125814	NAPB	NSF attachment protein beta [Source:HGNC Symbol;Acc:HGNC:15751]	AFFY_PRIMEVIEW
422	11718353_AT	422.1	ENSG00000023318	ERP44	endoplasmic reticulum protein 44 [Source:HGNC Symbol;Acc:HGNC:18311]	AFFY_PRIMEVIEW
423	11718361_AT	423.1	ENSG00000121058	COIL	coilin [Source:HGNC Symbol;Acc:HGNC:2184]	AFFY_PRIMEVIEW
424	11718368_AT	424.1	ENSG00000130702	LAMA5	laminin subunit alpha 5 [Source:HGNC Symbol;Acc:HGNC:6485]	AFFY_PRIMEVIEW
425	11718374_AT	425.1	ENSG00000196363	WDR5	WD repeat domain 5 [Source:HGNC Symbol;Acc:HGNC:12757]	AFFY_PRIMEVIEW
426	11718375_X_AT	426.1	ENSG00000196363	WDR5	WD repeat domain 5 [Source:HGNC Symbol;Acc:HGNC:12757]	AFFY_PRIMEVIEW
427	11718414_S_AT	427.1	ENSG00000147140	NONO	non-POU domain containing octamer binding [Source:HGNC Symbol;Acc:HGNC:7871]	AFFY_PRIMEVIEW
427	11718414_S_AT	427.2	ENSG00000260290	AC092115.1	N/A	AFFY_PRIMEVIEW
428	11718415_X_AT	428.1	ENSG00000147140	NONO	non-POU domain containing octamer binding [Source:HGNC Symbol;Acc:HGNC:7871]	AFFY_PRIMEVIEW
429	11718422_S_AT	429.1	ENSG00000100814	CCNB1IP1	cyclin B1 interacting protein 1 [Source:HGNC Symbol;Acc:HGNC:19437]	AFFY_PRIMEVIEW
430	11718429_AT	430.1	ENSG00000102119	EMD	emerin [Source:HGNC Symbol;Acc:HGNC:3331]	AFFY_PRIMEVIEW
431	11718441_S_AT	431.1	ENSG00000267303	AC011511.4	N/A	AFFY_PRIMEVIEW
431	11718441_S_AT	431.2	ENSG00000161847	RAVER1	ribonucleoprotein, PTB binding 1 [Source:HGNC Symbol;Acc:HGNC:30296]	AFFY_PRIMEVIEW
432	11718443_AT	432.1	ENSG00000138834	MAPK8IP3	mitogen-activated protein kinase 8 interacting protein 3 [Source:HGNC Symbol;Acc:HGNC:6884]	AFFY_PRIMEVIEW
433	11718451_A_AT	433.1	ENSG00000168646	AXIN2	axin 2 [Source:HGNC Symbol;Acc:HGNC:904]	AFFY_PRIMEVIEW
433	11718451_A_AT	433.2	ENSG00000266076	AC004805.1	N/A	AFFY_PRIMEVIEW
434	11718452_AT	434.1	ENSG00000168646	AXIN2	axin 2 [Source:HGNC Symbol;Acc:HGNC:904]	AFFY_PRIMEVIEW
435	11718453_A_AT	435.1	ENSG00000168646	AXIN2	axin 2 [Source:HGNC Symbol;Acc:HGNC:904]	AFFY_PRIMEVIEW
436	11718456_AT	436.1	ENSG00000167703	SLC43A2	solute carrier family 43 member 2 [Source:HGNC Symbol;Acc:HGNC:23087]	AFFY_PRIMEVIEW
437	11718462_A_AT	437.1	ENSG00000115459	ELMOD3	ELMO domain containing 3 [Source:HGNC Symbol;Acc:HGNC:26158]	AFFY_PRIMEVIEW
438	11718466_A_AT	438.1	ENSG00000071051	NCK2	NCK adaptor protein 2 [Source:HGNC Symbol;Acc:HGNC:7665]	AFFY_PRIMEVIEW
439	11718467_AT	439.1	ENSG00000071051	NCK2	NCK adaptor protein 2 [Source:HGNC Symbol;Acc:HGNC:7665]	AFFY_PRIMEVIEW
440	11718476_X_AT	440.1	ENSG00000147465	STAR	steroidogenic acute regulatory protein [Source:HGNC Symbol;Acc:HGNC:11359]	AFFY_PRIMEVIEW
441	11718477_A_AT	441.1	ENSG00000147465	STAR	steroidogenic acute regulatory protein [Source:HGNC Symbol;Acc:HGNC:11359]	AFFY_PRIMEVIEW
442	11718489_S_AT	442.1	ENSG00000135336	ORC3	origin recognition complex subunit 3 [Source:HGNC Symbol;Acc:HGNC:8489]	AFFY_PRIMEVIEW
443	11718508_AT	443.1	N/A	N/A	N/A	N/A
444	11718522_A_AT	444.1	ENSG00000116698	SMG7	SMG7, nonsense mediated mRNA decay factor [Source:HGNC Symbol;Acc:HGNC:16792]	AFFY_PRIMEVIEW
445	11718527_AT	445.1	ENSG00000178860	MSC	musculin [Source:HGNC Symbol;Acc:HGNC:7321]	AFFY_PRIMEVIEW
446	11718534_AT	446.1	ENSG00000114857	NKTR	natural killer cell triggering receptor [Source:HGNC Symbol;Acc:HGNC:7833]	AFFY_PRIMEVIEW
447	11718535_AT	447.1	ENSG00000114857	NKTR	natural killer cell triggering receptor [Source:HGNC Symbol;Acc:HGNC:7833]	AFFY_PRIMEVIEW
448	11718536_S_AT	448.1	ENSG00000114857	NKTR	natural killer cell triggering receptor [Source:HGNC Symbol;Acc:HGNC:7833]	AFFY_PRIMEVIEW
449	11718542_A_AT	449.1	ENSG00000137817	PARP6	poly(ADP-ribose) polymerase family member 6 [Source:HGNC Symbol;Acc:HGNC:26921]	AFFY_PRIMEVIEW
450	11718548_X_AT	450.1	ENSG00000129351	ILF3	interleukin enhancer binding factor 3 [Source:HGNC Symbol;Acc:HGNC:6038]	AFFY_PRIMEVIEW
451	11718549_A_AT	451.1	ENSG00000129351	ILF3	interleukin enhancer binding factor 3 [Source:HGNC Symbol;Acc:HGNC:6038]	AFFY_PRIMEVIEW
452	11718556_S_AT	452.1	ENSG00000182158	CREB3L2	cAMP responsive element binding protein 3 like 2 [Source:HGNC Symbol;Acc:HGNC:23720]	AFFY_PRIMEVIEW
453	11718563_A_AT	453.1	ENSG00000088448	ANKRD10	ankyrin repeat domain 10 [Source:HGNC Symbol;Acc:HGNC:20265]	AFFY_PRIMEVIEW
454	11718565_AT	454.1	ENSG00000257093	KIAA1147	KIAA1147 [Source:HGNC Symbol;Acc:HGNC:29472]	AFFY_PRIMEVIEW
455	11718594_A_AT	455.1	ENSG00000163660	CCNL1	cyclin L1 [Source:HGNC Symbol;Acc:HGNC:20569]	AFFY_PRIMEVIEW
456	11718595_A_AT	456.1	ENSG00000149806	FAU	FAU, ubiquitin like and ribosomal protein S30 fusion [Source:HGNC Symbol;Acc:HGNC:3597]	AFFY_PRIMEVIEW
457	11718606_A_AT	457.1	ENSG00000100418	DESI1	desumoylating isopeptidase 1 [Source:HGNC Symbol;Acc:HGNC:24577]	AFFY_PRIMEVIEW
458	11718607_X_AT	458.1	ENSG00000100418	DESI1	desumoylating isopeptidase 1 [Source:HGNC Symbol;Acc:HGNC:24577]	AFFY_PRIMEVIEW
459	11718609_A_AT	459.1	ENSG00000163159	VPS72	vacuolar protein sorting 72 homolog [Source:HGNC Symbol;Acc:HGNC:11644]	AFFY_PRIMEVIEW
460	11718613_A_AT	460.1	ENSG00000119688	ABCD4	ATP binding cassette subfamily D member 4 [Source:HGNC Symbol;Acc:HGNC:68]	AFFY_PRIMEVIEW
461	11718622_X_AT	461.1	ENSG00000011485	PPP5C	protein phosphatase 5 catalytic subunit [Source:HGNC Symbol;Acc:HGNC:9322]	AFFY_PRIMEVIEW
462	11718636_A_AT	462.1	ENSG00000171988	JMJD1C	jumonji domain containing 1C [Source:HGNC Symbol;Acc:HGNC:12313]	AFFY_PRIMEVIEW
463	11718660_A_AT	463.1	ENSG00000117691	NENF	neudesin neurotrophic factor [Source:HGNC Symbol;Acc:HGNC:30384]	AFFY_PRIMEVIEW
464	11718671_A_AT	464.1	ENSG00000149179	C11ORF49	chromosome 11 open reading frame 49 [Source:HGNC Symbol;Acc:HGNC:28720]	AFFY_PRIMEVIEW
465	11718681_A_AT	465.1	ENSG00000106443	PHF14	PHD finger protein 14 [Source:HGNC Symbol;Acc:HGNC:22203]	AFFY_PRIMEVIEW
466	11718689_AT	466.1	ENSG00000132688	NES	nestin [Source:HGNC Symbol;Acc:HGNC:7756]	AFFY_PRIMEVIEW
467	11718695_A_AT	467.1	ENSG00000167645	YIF1B	Yip1 interacting factor homolog B, membrane trafficking protein [Source:HGNC Symbol;Acc:HGNC:30511]	AFFY_PRIMEVIEW
468	11718696_X_AT	468.1	ENSG00000167645	YIF1B	Yip1 interacting factor homolog B, membrane trafficking protein [Source:HGNC Symbol;Acc:HGNC:30511]	AFFY_PRIMEVIEW
469	11718709_A_AT	469.1	ENSG00000197226	TBC1D9B	TBC1 domain family member 9B [Source:HGNC Symbol;Acc:HGNC:29097]	AFFY_PRIMEVIEW
470	11718729_AT	470.1	ENSG00000142039	CCDC97	coiled-coil domain containing 97 [Source:HGNC Symbol;Acc:HGNC:28289]	AFFY_PRIMEVIEW
471	11718734_A_AT	471.1	ENSG00000143157	POGK	pogo transposable element derived with KRAB domain [Source:HGNC Symbol;Acc:HGNC:18800]	AFFY_PRIMEVIEW
472	11718737_A_AT	472.1	ENSG00000008513	ST3GAL1	ST3 beta-galactoside alpha-2,3-sialyltransferase 1 [Source:HGNC Symbol;Acc:HGNC:10862]	AFFY_PRIMEVIEW
473	11718748_AT	473.1	ENSG00000131094	C1QL1	complement C1q like 1 [Source:HGNC Symbol;Acc:HGNC:24182]	AFFY_PRIMEVIEW
474	11718752_S_AT	474.1	ENSG00000157353	FUK	fucokinase [Source:HGNC Symbol;Acc:HGNC:29500]	AFFY_PRIMEVIEW
475	11718766_AT	475.1	ENSG00000150687	PRSS23	serine protease 23 [Source:HGNC Symbol;Acc:HGNC:14370]	AFFY_PRIMEVIEW
476	11718788_A_AT	476.1	ENSG00000196839	ADA	adenosine deaminase [Source:HGNC Symbol;Acc:HGNC:186]	AFFY_PRIMEVIEW
477	11718791_S_AT	477.1	ENSG00000131558	EXOC4	exocyst complex component 4 [Source:HGNC Symbol;Acc:HGNC:30389]	AFFY_PRIMEVIEW
478	11718797_A_AT	478.1	ENSG00000162073	PAQR4	progestin and adipoQ receptor family member 4 [Source:HGNC Symbol;Acc:HGNC:26386]	AFFY_PRIMEVIEW
479	11718800_AT	479.1	ENSG00000060656	PTPRU	protein tyrosine phosphatase, receptor type U [Source:HGNC Symbol;Acc:HGNC:9683]	AFFY_PRIMEVIEW
480	11718814_X_AT	480.1	ENSG00000110400	NECTIN1	nectin cell adhesion molecule 1 [Source:HGNC Symbol;Acc:HGNC:9706]	AFFY_PRIMEVIEW
481	11718829_A_AT	481.1	ENSG00000110047	EHD1	EH domain containing 1 [Source:HGNC Symbol;Acc:HGNC:3242]	AFFY_PRIMEVIEW
482	11718832_A_AT	482.1	ENSG00000134013	LOXL2	lysyl oxidase like 2 [Source:HGNC Symbol;Acc:HGNC:6666]	AFFY_PRIMEVIEW
483	11718839_A_AT	483.1	ENSG00000103111	MON1B	MON1 homolog B, secretory trafficking associated [Source:HGNC Symbol;Acc:HGNC:25020]	AFFY_PRIMEVIEW
484	11718845_A_AT	484.1	ENSG00000258643	BCL2L2-PABPN1	BCL2L2-PABPN1 readthrough [Source:HGNC Symbol;Acc:HGNC:42959]	AFFY_PRIMEVIEW
484	11718845_A_AT	484.2	ENSG00000100836	PABPN1	poly(A) binding protein nuclear 1 [Source:HGNC Symbol;Acc:HGNC:8565]	AFFY_PRIMEVIEW
485	11718864_S_AT	485.1	ENSG00000025796	SEC63	SEC63 homolog, protein translocation regulator [Source:HGNC Symbol;Acc:HGNC:21082]	AFFY_PRIMEVIEW
486	11718867_A_AT	486.1	ENSG00000172775	FAM192A	family with sequence similarity 192 member A [Source:HGNC Symbol;Acc:HGNC:29856]	AFFY_PRIMEVIEW
486	11718867_A_AT	486.2	ENSG00000231841	FAM192BP	family with sequence similarity 192 member B, pseudogene [Source:HGNC Symbol;Acc:HGNC:37194]	AFFY_PRIMEVIEW
487	11718868_A_AT	487.1	ENSG00000099260	PALMD	palmdelphin [Source:HGNC Symbol;Acc:HGNC:15846]	AFFY_PRIMEVIEW
488	11718880_AT	488.1	ENSG00000140948	ZCCHC14	zinc finger CCHC-type containing 14 [Source:HGNC Symbol;Acc:HGNC:24134]	AFFY_PRIMEVIEW
489	11718888_A_AT	489.1	ENSG00000105696	TMEM59L	transmembrane protein 59 like [Source:HGNC Symbol;Acc:HGNC:13237]	AFFY_PRIMEVIEW
490	11718899_AT	490.1	ENSG00000140521	POLG	DNA polymerase gamma, catalytic subunit [Source:HGNC Symbol;Acc:HGNC:9179]	AFFY_PRIMEVIEW
491	11718922_A_AT	491.1	ENSG00000144711	IQSEC1	IQ motif and Sec7 domain 1 [Source:HGNC Symbol;Acc:HGNC:29112]	AFFY_PRIMEVIEW
492	11718923_A_AT	492.1	ENSG00000144711	IQSEC1	IQ motif and Sec7 domain 1 [Source:HGNC Symbol;Acc:HGNC:29112]	AFFY_PRIMEVIEW
493	11718925_A_AT	493.1	ENSG00000198373	WWP2	WW domain containing E3 ubiquitin protein ligase 2 [Source:HGNC Symbol;Acc:HGNC:16804]	AFFY_PRIMEVIEW
494	11718927_A_AT	494.1	ENSG00000150347	ARID5B	AT-rich interaction domain 5B [Source:HGNC Symbol;Acc:HGNC:17362]	AFFY_PRIMEVIEW
495	11718934_A_AT	495.1	ENSG00000204344	STK19	serine/threonine kinase 19 [Source:HGNC Symbol;Acc:HGNC:11398]	AFFY_PRIMEVIEW
495	11718934_A_AT	495.2	ENSG00000250535	STK19B	serine/threonine kinase 19B (pseudogene) [Source:HGNC Symbol;Acc:HGNC:21668]	AFFY_PRIMEVIEW
496	11718938_S_AT	496.1	ENSG00000156795	WDYHV1	WDYHV motif containing 1 [Source:HGNC Symbol;Acc:HGNC:25490]	AFFY_PRIMEVIEW
497	11718943_A_AT	497.1	ENSG00000087586	AURKA	aurora kinase A [Source:HGNC Symbol;Acc:HGNC:11393]	AFFY_PRIMEVIEW
498	11718963_AT	498.1	ENSG00000108256	NUFIP2	NUFIP2, FMR1 interacting protein 2 [Source:HGNC Symbol;Acc:HGNC:17634]	AFFY_PRIMEVIEW
499	11718970_A_AT	499.1	ENSG00000117335	CD46	CD46 molecule [Source:HGNC Symbol;Acc:HGNC:6953]	AFFY_PRIMEVIEW
500	11718973_AT	500.1	ENSG00000175445	LPL	lipoprotein lipase [Source:HGNC Symbol;Acc:HGNC:6677]	AFFY_PRIMEVIEW
501	11718981_A_AT	501.1	ENSG00000253676	TAGLN2P1	transgelin 2 pseudogene 1 [Source:HGNC Symbol;Acc:HGNC:21739]	AFFY_PRIMEVIEW
501	11718981_A_AT	501.2	ENSG00000158710	TAGLN2	transgelin 2 [Source:HGNC Symbol;Acc:HGNC:11554]	AFFY_PRIMEVIEW
502	11718984_A_AT	502.1	ENSG00000162413	KLHL21	kelch like family member 21 [Source:HGNC Symbol;Acc:HGNC:29041]	AFFY_PRIMEVIEW
503	11718986_A_AT	503.1	ENSG00000126709	IFI6	interferon alpha inducible protein 6 [Source:HGNC Symbol;Acc:HGNC:4054]	AFFY_PRIMEVIEW
504	11719001_A_AT	504.1	ENSG00000171148	TADA3	transcriptional adaptor 3 [Source:HGNC Symbol;Acc:HGNC:19422]	AFFY_PRIMEVIEW
505	11719002_AT	505.1	ENSG00000100196	KDELR3	KDEL endoplasmic reticulum protein retention receptor 3 [Source:HGNC Symbol;Acc:HGNC:6306]	AFFY_PRIMEVIEW
506	11719003_X_AT	506.1	ENSG00000154122	ANKH	ANKH inorganic pyrophosphate transport regulator [Source:HGNC Symbol;Acc:HGNC:15492]	AFFY_PRIMEVIEW
507	11719014_S_AT	507.1	ENSG00000174804	FZD4	frizzled class receptor 4 [Source:HGNC Symbol;Acc:HGNC:4042]	AFFY_PRIMEVIEW
508	11719019_AT	508.1	ENSG00000067955	CBFB	core-binding factor subunit beta [Source:HGNC Symbol;Acc:HGNC:1539]	AFFY_PRIMEVIEW
509	11719047_S_AT	509.1	ENSG00000166483	WEE1	WEE1 G2 checkpoint kinase [Source:HGNC Symbol;Acc:HGNC:12761]	AFFY_PRIMEVIEW
510	11719054_AT	510.1	ENSG00000135837	CEP350	centrosomal protein 350 [Source:HGNC Symbol;Acc:HGNC:24238]	AFFY_PRIMEVIEW
511	11719072_X_AT	511.1	ENSG00000065268	WDR18	WD repeat domain 18 [Source:HGNC Symbol;Acc:HGNC:17956]	AFFY_PRIMEVIEW
512	11719077_A_AT	512.1	ENSG00000165526	RPUSD4	RNA pseudouridylate synthase domain containing 4 [Source:HGNC Symbol;Acc:HGNC:25898]	AFFY_PRIMEVIEW
513	11719083_X_AT	513.1	ENSG00000167112	TRUB2	TruB pseudouridine synthase family member 2 [Source:HGNC Symbol;Acc:HGNC:17170]	AFFY_PRIMEVIEW
514	11719103_AT	514.1	ENSG00000085719	CPNE3	copine 3 [Source:HGNC Symbol;Acc:HGNC:2316]	AFFY_PRIMEVIEW
515	11719109_X_AT	515.1	ENSG00000183386	FHL3	four and a half LIM domains 3 [Source:HGNC Symbol;Acc:HGNC:3704]	AFFY_PRIMEVIEW
516	11719124_AT	516.1	ENSG00000111602	TIMELESS	timeless circadian regulator [Source:HGNC Symbol;Acc:HGNC:11813]	AFFY_PRIMEVIEW
517	11719136_AT	517.1	ENSG00000079134	THOC1	THO complex 1 [Source:HGNC Symbol;Acc:HGNC:19070]	AFFY_PRIMEVIEW
518	11719138_AT	518.1	ENSG00000125871	MGME1	mitochondrial genome maintenance exonuclease 1 [Source:HGNC Symbol;Acc:HGNC:16205]	AFFY_PRIMEVIEW
519	11719148_A_AT	519.1	ENSG00000105643	ARRDC2	arrestin domain containing 2 [Source:HGNC Symbol;Acc:HGNC:25225]	AFFY_PRIMEVIEW
520	11719151_AT	520.1	ENSG00000180921	FAM83H	family with sequence similarity 83 member H [Source:HGNC Symbol;Acc:HGNC:24797]	AFFY_PRIMEVIEW
521	11719155_A_AT	521.1	ENSG00000136048	DRAM1	DNA damage regulated autophagy modulator 1 [Source:HGNC Symbol;Acc:HGNC:25645]	AFFY_PRIMEVIEW
522	11719159_AT	522.1	ENSG00000173166	RAPH1	Ras association (RalGDS/AF-6) and pleckstrin homology domains 1 [Source:HGNC Symbol;Acc:HGNC:14436]	AFFY_PRIMEVIEW
523	11719161_A_AT	523.1	ENSG00000166123	GPT2	glutamic--pyruvic transaminase 2 [Source:HGNC Symbol;Acc:HGNC:18062]	AFFY_PRIMEVIEW
524	11719163_A_AT	524.1	ENSG00000171365	CLCN5	chloride voltage-gated channel 5 [Source:HGNC Symbol;Acc:HGNC:2023]	AFFY_PRIMEVIEW
525	11719170_A_AT	525.1	ENSG00000259522	AL136295.4	N/A	AFFY_PRIMEVIEW
525	11719170_A_AT	525.2	ENSG00000196497	IPO4	importin 4 [Source:HGNC Symbol;Acc:HGNC:19426]	AFFY_PRIMEVIEW
526	11719178_A_AT	526.1	ENSG00000073008	PVR	poliovirus receptor [Source:HGNC Symbol;Acc:HGNC:9705]	AFFY_PRIMEVIEW
527	11719179_A_AT	527.1	ENSG00000073008	PVR	poliovirus receptor [Source:HGNC Symbol;Acc:HGNC:9705]	AFFY_PRIMEVIEW
528	11719183_A_AT	528.1	ENSG00000140995	DEF8	differentially expressed in FDCP 8 homolog [Source:HGNC Symbol;Acc:HGNC:25969]	AFFY_PRIMEVIEW
529	11719195_A_AT	529.1	ENSG00000171453	POLR1C	RNA polymerase I and III subunit C [Source:HGNC Symbol;Acc:HGNC:20194]	AFFY_PRIMEVIEW
530	11719210_A_AT	530.1	ENSG00000104142	VPS18	VPS18, CORVET/HOPS core subunit [Source:HGNC Symbol;Acc:HGNC:15972]	AFFY_PRIMEVIEW
531	11719227_X_AT	531.1	ENSG00000104783	KCNN4	potassium calcium-activated channel subfamily N member 4 [Source:HGNC Symbol;Acc:HGNC:6293]	AFFY_PRIMEVIEW
532	11719239_AT	532.1	ENSG00000110218	PANX1	pannexin 1 [Source:HGNC Symbol;Acc:HGNC:8599]	AFFY_PRIMEVIEW
533	11719254_AT	533.1	ENSG00000155111	CDK19	cyclin dependent kinase 19 [Source:HGNC Symbol;Acc:HGNC:19338]	AFFY_PRIMEVIEW
534	11719256_A_AT	534.1	ENSG00000070018	LRP6	LDL receptor related protein 6 [Source:HGNC Symbol;Acc:HGNC:6698]	AFFY_PRIMEVIEW
535	11719264_AT	535.1	ENSG00000167778	SPRYD3	SPRY domain containing 3 [Source:HGNC Symbol;Acc:HGNC:25920]	AFFY_PRIMEVIEW
536	11719271_S_AT	536.1	ENSG00000169919	GUSB	glucuronidase beta [Source:HGNC Symbol;Acc:HGNC:4696]	AFFY_PRIMEVIEW
537	11719277_S_AT	537.1	ENSG00000158042	MRPL17	mitochondrial ribosomal protein L17 [Source:HGNC Symbol;Acc:HGNC:14053]	AFFY_PRIMEVIEW
538	11719316_S_AT	538.1	ENSG00000083535	PIBF1	progesterone immunomodulatory binding factor 1 [Source:HGNC Symbol;Acc:HGNC:23352]	AFFY_PRIMEVIEW
539	11719325_S_AT	539.1	ENSG00000004487	KDM1A	lysine demethylase 1A [Source:HGNC Symbol;Acc:HGNC:29079]	AFFY_PRIMEVIEW
540	11719326_A_AT	540.1	ENSG00000135164	DMTF1	cyclin D binding myb like transcription factor 1 [Source:HGNC Symbol;Acc:HGNC:14603]	AFFY_PRIMEVIEW
541	11719330_S_AT	541.1	ENSG00000115226	FNDC4	fibronectin type III domain containing 4 [Source:HGNC Symbol;Acc:HGNC:20239]	AFFY_PRIMEVIEW
542	11719338_S_AT	542.1	ENSG00000089057	SLC23A2	solute carrier family 23 member 2 [Source:HGNC Symbol;Acc:HGNC:10973]	AFFY_PRIMEVIEW
543	11719340_A_AT	543.1	ENSG00000124920	MYRF	myelin regulatory factor [Source:HGNC Symbol;Acc:HGNC:1181]	AFFY_PRIMEVIEW
544	11719341_S_AT	544.1	ENSG00000163900	TMEM41A	transmembrane protein 41A [Source:HGNC Symbol;Acc:HGNC:30544]	AFFY_PRIMEVIEW
545	11719351_S_AT	545.1	ENSG00000135968	GCC2	GRIP and coiled-coil domain containing 2 [Source:HGNC Symbol;Acc:HGNC:23218]	AFFY_PRIMEVIEW
546	11719352_X_AT	546.1	ENSG00000135968	GCC2	GRIP and coiled-coil domain containing 2 [Source:HGNC Symbol;Acc:HGNC:23218]	AFFY_PRIMEVIEW
547	11719368_S_AT	547.1	ENSG00000162889	MAPKAPK2	mitogen-activated protein kinase-activated protein kinase 2 [Source:HGNC Symbol;Acc:HGNC:6887]	AFFY_PRIMEVIEW
548	11719374_A_AT	548.1	ENSG00000088298	EDEM2	ER degradation enhancing alpha-mannosidase like protein 2 [Source:HGNC Symbol;Acc:HGNC:15877]	AFFY_PRIMEVIEW
549	11719435_A_AT	549.1	ENSG00000134569	LRP4	LDL receptor related protein 4 [Source:HGNC Symbol;Acc:HGNC:6696]	AFFY_PRIMEVIEW
550	11719438_AT	550.1	ENSG00000266028	SRGAP2	SLIT-ROBO Rho GTPase activating protein 2 [Source:HGNC Symbol;Acc:HGNC:19751]	AFFY_PRIMEVIEW
551	11719464_X_AT	551.1	ENSG00000137154	RPS6	ribosomal protein S6 [Source:HGNC Symbol;Acc:HGNC:10429]	AFFY_PRIMEVIEW
552	11719467_S_AT	552.1	ENSG00000105618	PRPF31	pre-mRNA processing factor 31 [Source:HGNC Symbol;Acc:HGNC:15446]	AFFY_PRIMEVIEW
553	11719474_A_AT	553.1	ENSG00000136718	IMP4	IMP4, U3 small nucleolar ribonucleoprotein [Source:HGNC Symbol;Acc:HGNC:30856]	AFFY_PRIMEVIEW
554	11719476_AT	554.1	ENSG00000124098	FAM210B	family with sequence similarity 210 member B [Source:HGNC Symbol;Acc:HGNC:16102]	AFFY_PRIMEVIEW
555	11719481_A_AT	555.1	ENSG00000164434	FABP7	fatty acid binding protein 7 [Source:HGNC Symbol;Acc:HGNC:3562]	AFFY_PRIMEVIEW
556	11719488_AT	556.1	ENSG00000151617	EDNRA	endothelin receptor type A [Source:HGNC Symbol;Acc:HGNC:3179]	AFFY_PRIMEVIEW
557	11719489_A_AT	557.1	ENSG00000151617	EDNRA	endothelin receptor type A [Source:HGNC Symbol;Acc:HGNC:3179]	AFFY_PRIMEVIEW
558	11719495_A_AT	558.1	ENSG00000232553	CLK2P1	CDC like kinase 2, pseudogene 1 [Source:HGNC Symbol;Acc:HGNC:2070]	AFFY_PRIMEVIEW
558	11719495_A_AT	558.2	ENSG00000176444	CLK2	CDC like kinase 2 [Source:HGNC Symbol;Acc:HGNC:2069]	AFFY_PRIMEVIEW
559	11719496_A_AT	559.1	ENSG00000176256	HMGB4	high mobility group box 4 [Source:HGNC Symbol;Acc:HGNC:24954]	AFFY_PRIMEVIEW
560	11719497_AT	560.1	ENSG00000171608	PIK3CD	phosphatidylinositol-4,5-bisphosphate 3-kinase catalytic subunit delta [Source:HGNC Symbol;Acc:HGNC:8977]	AFFY_PRIMEVIEW
561	11719519_AT	561.1	ENSG00000112902	SEMA5A	semaphorin 5A [Source:HGNC Symbol;Acc:HGNC:10736]	AFFY_PRIMEVIEW
562	11719524_A_AT	562.1	ENSG00000248751	AC004997.1	N/A	AFFY_PRIMEVIEW
562	11719524_A_AT	562.2	ENSG00000239282	CASTOR1	cytosolic arginine sensor for mTORC1 subunit 1 [Source:HGNC Symbol;Acc:HGNC:34423]	AFFY_PRIMEVIEW
563	11719526_A_AT	563.1	ENSG00000099949	LZTR1	leucine zipper like transcription regulator 1 [Source:HGNC Symbol;Acc:HGNC:6742]	AFFY_PRIMEVIEW
563	11719526_A_AT	563.2	ENSG00000285314	AC002470.2	N/A	AFFY_PRIMEVIEW
564	11719529_AT	564.1	ENSG00000129911	KLF16	Kruppel like factor 16 [Source:HGNC Symbol;Acc:HGNC:16857]	AFFY_PRIMEVIEW
565	11719530_X_AT	565.1	ENSG00000129911	KLF16	Kruppel like factor 16 [Source:HGNC Symbol;Acc:HGNC:16857]	AFFY_PRIMEVIEW
566	11719532_X_AT	566.1	ENSG00000123342	MMP19	matrix metallopeptidase 19 [Source:HGNC Symbol;Acc:HGNC:7165]	AFFY_PRIMEVIEW
567	11719539_A_AT	567.1	ENSG00000166881	NEMP1	nuclear envelope integral membrane protein 1 [Source:HGNC Symbol;Acc:HGNC:29001]	AFFY_PRIMEVIEW
568	11719540_A_AT	568.1	ENSG00000166881	NEMP1	nuclear envelope integral membrane protein 1 [Source:HGNC Symbol;Acc:HGNC:29001]	AFFY_PRIMEVIEW
569	11719542_A_AT	569.1	ENSG00000159086	PAXBP1	PAX3 and PAX7 binding protein 1 [Source:HGNC Symbol;Acc:HGNC:13579]	AFFY_PRIMEVIEW
570	11719552_A_AT	570.1	ENSG00000072422	RHOBTB1	Rho related BTB domain containing 1 [Source:HGNC Symbol;Acc:HGNC:18738]	AFFY_PRIMEVIEW
571	11719566_A_AT	571.1	ENSG00000116898	MRPS15	mitochondrial ribosomal protein S15 [Source:HGNC Symbol;Acc:HGNC:14504]	AFFY_PRIMEVIEW
572	11719575_X_AT	572.1	ENSG00000135249	RINT1	RAD50 interactor 1 [Source:HGNC Symbol;Acc:HGNC:21876]	AFFY_PRIMEVIEW
573	11719578_X_AT	573.1	ENSG00000145020	AMT	aminomethyltransferase [Source:HGNC Symbol;Acc:HGNC:473]	AFFY_PRIMEVIEW
573	11719578_X_AT	573.2	ENSG00000283189	AC104452.1	N/A	AFFY_PRIMEVIEW
574	11719583_A_AT	574.1	N/A	N/A	N/A	N/A
575	11719596_AT	575.1	ENSG00000013016	EHD3	EH domain containing 3 [Source:HGNC Symbol;Acc:HGNC:3244]	AFFY_PRIMEVIEW
576	11719604_A_AT	576.1	ENSG00000169410	PTPN9	protein tyrosine phosphatase, non-receptor type 9 [Source:HGNC Symbol;Acc:HGNC:9661]	AFFY_PRIMEVIEW
577	11719611_AT	577.1	ENSG00000181915	ADO	2-aminoethanethiol dioxygenase [Source:HGNC Symbol;Acc:HGNC:23506]	AFFY_PRIMEVIEW
578	11719618_A_AT	578.1	ENSG00000139197	PEX5	peroxisomal biogenesis factor 5 [Source:HGNC Symbol;Acc:HGNC:9719]	AFFY_PRIMEVIEW
579	11719625_A_AT	579.1	ENSG00000130177	CDC16	cell division cycle 16 [Source:HGNC Symbol;Acc:HGNC:1720]	AFFY_PRIMEVIEW
580	11719626_AT	580.1	ENSG00000121039	RDH10	retinol dehydrogenase 10 [Source:HGNC Symbol;Acc:HGNC:19975]	AFFY_PRIMEVIEW
581	11719629_A_AT	581.1	ENSG00000204256	BRD2	bromodomain containing 2 [Source:HGNC Symbol;Acc:HGNC:1103]	AFFY_PRIMEVIEW
582	11719653_AT	582.1	ENSG00000159164	SV2A	synaptic vesicle glycoprotein 2A [Source:HGNC Symbol;Acc:HGNC:20566]	AFFY_PRIMEVIEW
583	11719657_A_AT	583.1	ENSG00000100985	MMP9	matrix metallopeptidase 9 [Source:HGNC Symbol;Acc:HGNC:7176]	AFFY_PRIMEVIEW
584	11719664_A_AT	584.1	ENSG00000203879	GDI1	GDP dissociation inhibitor 1 [Source:HGNC Symbol;Acc:HGNC:4226]	AFFY_PRIMEVIEW
585	11719667_S_AT	585.1	ENSG00000117632	STMN1	stathmin 1 [Source:HGNC Symbol;Acc:HGNC:6510]	AFFY_PRIMEVIEW
586	11719686_A_AT	586.1	ENSG00000135596	MICAL1	microtubule associated monooxygenase, calponin and LIM domain containing 1 [Source:HGNC Symbol;Acc:HGNC:20619]	AFFY_PRIMEVIEW
587	11719700_A_AT	587.1	ENSG00000152767	FARP1	FERM, ARH/RhoGEF and pleckstrin domain protein 1 [Source:HGNC Symbol;Acc:HGNC:3591]	AFFY_PRIMEVIEW
588	11719701_S_AT	588.1	ENSG00000152767	FARP1	FERM, ARH/RhoGEF and pleckstrin domain protein 1 [Source:HGNC Symbol;Acc:HGNC:3591]	AFFY_PRIMEVIEW
589	11719705_A_AT	589.1	ENSG00000103507	BCKDK	branched chain ketoacid dehydrogenase kinase [Source:HGNC Symbol;Acc:HGNC:16902]	AFFY_PRIMEVIEW
590	11719706_AT	590.1	ENSG00000125352	RNF113A	ring finger protein 113A [Source:HGNC Symbol;Acc:HGNC:12974]	AFFY_PRIMEVIEW
591	11719711_A_AT	591.1	ENSG00000140992	PDPK1	3-phosphoinositide dependent protein kinase 1 [Source:HGNC Symbol;Acc:HGNC:8816]	AFFY_PRIMEVIEW
592	11719724_AT	592.1	ENSG00000125633	CCDC93	coiled-coil domain containing 93 [Source:HGNC Symbol;Acc:HGNC:25611]	AFFY_PRIMEVIEW
593	11719725_AT	593.1	ENSG00000080608	PUM3	pumilio RNA binding family member 3 [Source:HGNC Symbol;Acc:HGNC:29676]	AFFY_PRIMEVIEW
594	11719728_S_AT	594.1	ENSG00000198053	SIRPA	signal regulatory protein alpha [Source:HGNC Symbol;Acc:HGNC:9662]	AFFY_PRIMEVIEW
595	11719729_AT	595.1	ENSG00000148798	INA	internexin neuronal intermediate filament protein alpha [Source:HGNC Symbol;Acc:HGNC:6057]	AFFY_PRIMEVIEW
596	11719735_A_AT	596.1	ENSG00000204463	BAG6	BCL2 associated athanogene 6 [Source:HGNC Symbol;Acc:HGNC:13919]	AFFY_PRIMEVIEW
597	11719740_A_AT	597.1	ENSG00000172795	DCP2	decapping mRNA 2 [Source:HGNC Symbol;Acc:HGNC:24452]	AFFY_PRIMEVIEW
598	11719754_S_AT	598.1	ENSG00000136689	IL1RN	interleukin 1 receptor antagonist [Source:HGNC Symbol;Acc:HGNC:6000]	AFFY_PRIMEVIEW
599	11719762_A_AT	599.1	ENSG00000160360	GPSM1	G protein signaling modulator 1 [Source:HGNC Symbol;Acc:HGNC:17858]	AFFY_PRIMEVIEW
600	11719794_A_AT	600.1	ENSG00000112640	PPP2R5D	protein phosphatase 2 regulatory subunit B'delta [Source:HGNC Symbol;Acc:HGNC:9312]	AFFY_PRIMEVIEW
601	11719795_A_AT	601.1	ENSG00000112640	PPP2R5D	protein phosphatase 2 regulatory subunit B'delta [Source:HGNC Symbol;Acc:HGNC:9312]	AFFY_PRIMEVIEW
602	11719800_AT	602.1	ENSG00000112308	C6ORF62	chromosome 6 open reading frame 62 [Source:HGNC Symbol;Acc:HGNC:20998]	AFFY_PRIMEVIEW
603	11719846_A_AT	603.1	ENSG00000105619	TFPT	TCF3 fusion partner [Source:HGNC Symbol;Acc:HGNC:13630]	AFFY_PRIMEVIEW
604	11719848_X_AT	604.1	ENSG00000136197	C7ORF25	chromosome 7 open reading frame 25 [Source:HGNC Symbol;Acc:HGNC:21703]	AFFY_PRIMEVIEW
604	11719848_X_AT	604.2	ENSG00000256646	AC010132.3	N/A	AFFY_PRIMEVIEW
605	11719856_X_AT	605.1	ENSG00000117480	FAAH	fatty acid amide hydrolase [Source:HGNC Symbol;Acc:HGNC:3553]	AFFY_PRIMEVIEW
606	11719873_X_AT	606.1	ENSG00000135521	LTV1	LTV1 ribosome biogenesis factor [Source:HGNC Symbol;Acc:HGNC:21173]	AFFY_PRIMEVIEW
607	11719874_A_AT	607.1	ENSG00000068971	PPP2R5B	protein phosphatase 2 regulatory subunit B'beta [Source:HGNC Symbol;Acc:HGNC:9310]	AFFY_PRIMEVIEW
608	11719879_AT	608.1	ENSG00000215114	UBXN2B	UBX domain protein 2B [Source:HGNC Symbol;Acc:HGNC:27035]	AFFY_PRIMEVIEW
609	11719892_AT	609.1	ENSG00000258610	AF111169.1	N/A	AFFY_PRIMEVIEW
609	11719892_AT	609.2	ENSG00000071246	VASH1	vasohibin 1 [Source:HGNC Symbol;Acc:HGNC:19964]	AFFY_PRIMEVIEW
610	11719897_X_AT	610.1	ENSG00000176853	FAM91A1	family with sequence similarity 91 member A1 [Source:HGNC Symbol;Acc:HGNC:26306]	AFFY_PRIMEVIEW
611	11719902_A_AT	611.1	ENSG00000136147	PHF11	PHD finger protein 11 [Source:HGNC Symbol;Acc:HGNC:17024]	AFFY_PRIMEVIEW
612	11719903_AT	612.1	ENSG00000154945	ANKRD40	ankyrin repeat domain 40 [Source:HGNC Symbol;Acc:HGNC:28233]	AFFY_PRIMEVIEW
613	11719907_A_AT	613.1	ENSG00000110987	BCL7A	BCL tumor suppressor 7A [Source:HGNC Symbol;Acc:HGNC:1004]	AFFY_PRIMEVIEW
614	11719919_A_AT	614.1	ENSG00000132286	TIMM10B	translocase of inner mitochondrial membrane 10B [Source:HGNC Symbol;Acc:HGNC:4022]	AFFY_PRIMEVIEW
615	11719922_A_AT	615.1	ENSG00000196743	GM2A	GM2 ganglioside activator [Source:HGNC Symbol;Acc:HGNC:4367]	AFFY_PRIMEVIEW
616	11719926_S_AT	616.1	ENSG00000244462	RBM12	RNA binding motif protein 12 [Source:HGNC Symbol;Acc:HGNC:9898]	AFFY_PRIMEVIEW
617	11719927_A_AT	617.1	ENSG00000185627	PSMD13	proteasome 26S subunit, non-ATPase 13 [Source:HGNC Symbol;Acc:HGNC:9558]	AFFY_PRIMEVIEW
618	11719934_A_AT	618.1	ENSG00000163931	TKT	transketolase [Source:HGNC Symbol;Acc:HGNC:11834]	AFFY_PRIMEVIEW
619	11719950_A_AT	619.1	ENSG00000132692	BCAN	brevican [Source:HGNC Symbol;Acc:HGNC:23059]	AFFY_PRIMEVIEW
620	11719953_S_AT	620.1	ENSG00000119321	FKBP15	FK506 binding protein 15 [Source:HGNC Symbol;Acc:HGNC:23397]	AFFY_PRIMEVIEW
621	11719955_A_AT	621.1	ENSG00000100413	POLR3H	RNA polymerase III subunit H [Source:HGNC Symbol;Acc:HGNC:30349]	AFFY_PRIMEVIEW
622	11719956_X_AT	622.1	ENSG00000100413	POLR3H	RNA polymerase III subunit H [Source:HGNC Symbol;Acc:HGNC:30349]	AFFY_PRIMEVIEW
623	11719963_A_AT	623.1	ENSG00000051128	HOMER3	homer scaffold protein 3 [Source:HGNC Symbol;Acc:HGNC:17514]	AFFY_PRIMEVIEW
624	11719979_A_AT	624.1	ENSG00000108557	RAI1	retinoic acid induced 1 [Source:HGNC Symbol;Acc:HGNC:9834]	AFFY_PRIMEVIEW
625	11719992_A_AT	625.1	ENSG00000087095	NLK	nemo like kinase [Source:HGNC Symbol;Acc:HGNC:29858]	AFFY_PRIMEVIEW
626	11720005_AT	626.1	ENSG00000106236	NPTX2	neuronal pentraxin 2 [Source:HGNC Symbol;Acc:HGNC:7953]	AFFY_PRIMEVIEW
627	11720008_A_AT	627.1	ENSG00000127954	STEAP4	STEAP4 metalloreductase [Source:HGNC Symbol;Acc:HGNC:21923]	AFFY_PRIMEVIEW
628	11720017_AT	628.1	ENSG00000128849	CGNL1	cingulin like 1 [Source:HGNC Symbol;Acc:HGNC:25931]	AFFY_PRIMEVIEW
629	11720020_X_AT	629.1	ENSG00000026036	RTEL1-TNFRSF6B	RTEL1-TNFRSF6B readthrough (NMD candidate) [Source:HGNC Symbol;Acc:HGNC:44095]	AFFY_PRIMEVIEW
629	11720020_X_AT	629.2	ENSG00000243509	TNFRSF6B	TNF receptor superfamily member 6b [Source:HGNC Symbol;Acc:HGNC:11921]	AFFY_PRIMEVIEW
630	11720023_A_AT	630.1	ENSG00000100376	FAM118A	family with sequence similarity 118 member A [Source:HGNC Symbol;Acc:HGNC:1313]	AFFY_PRIMEVIEW
631	11720024_A_AT	631.1	ENSG00000100376	FAM118A	family with sequence similarity 118 member A [Source:HGNC Symbol;Acc:HGNC:1313]	AFFY_PRIMEVIEW
632	11720025_S_AT	632.1	ENSG00000100376	FAM118A	family with sequence similarity 118 member A [Source:HGNC Symbol;Acc:HGNC:1313]	AFFY_PRIMEVIEW
633	11720031_A_AT	633.1	ENSG00000137699	TRIM29	tripartite motif containing 29 [Source:HGNC Symbol;Acc:HGNC:17274]	AFFY_PRIMEVIEW
634	11720035_S_AT	634.1	ENSG00000106144	CASP2	caspase 2 [Source:HGNC Symbol;Acc:HGNC:1503]	AFFY_PRIMEVIEW
635	11720042_A_AT	635.1	ENSG00000189306	RRP7A	ribosomal RNA processing 7 homolog A [Source:HGNC Symbol;Acc:HGNC:24286]	AFFY_PRIMEVIEW
635	11720042_A_AT	635.2	ENSG00000182841	RRP7BP	ribosomal RNA processing 7 homolog B, pseudogene [Source:HGNC Symbol;Acc:HGNC:30454]	AFFY_PRIMEVIEW
636	11720052_S_AT	636.1	ENSG00000126749	EMG1	EMG1, N1-specific pseudouridine methyltransferase [Source:NCBI gene;Acc:10436]	AFFY_PRIMEVIEW
637	11720053_X_AT	637.1	ENSG00000126749	EMG1	EMG1, N1-specific pseudouridine methyltransferase [Source:NCBI gene;Acc:10436]	AFFY_PRIMEVIEW
638	11720058_A_AT	638.1	ENSG00000085978	ATG16L1	autophagy related 16 like 1 [Source:HGNC Symbol;Acc:HGNC:21498]	AFFY_PRIMEVIEW
639	11720068_A_AT	639.1	ENSG00000138613	APH1B	aph-1 homolog B, gamma-secretase subunit [Source:HGNC Symbol;Acc:HGNC:24080]	AFFY_PRIMEVIEW
640	11720070_S_AT	640.1	ENSG00000265354	TIMM23	translocase of inner mitochondrial membrane 23 [Source:HGNC Symbol;Acc:HGNC:17312]	AFFY_PRIMEVIEW
641	11720074_X_AT	641.1	ENSG00000106263	EIF3B	eukaryotic translation initiation factor 3 subunit B [Source:HGNC Symbol;Acc:HGNC:3280]	AFFY_PRIMEVIEW
642	11720077_AT	642.1	ENSG00000284200	MIR6847	microRNA 6847 [Source:HGNC Symbol;Acc:HGNC:50022]	AFFY_PRIMEVIEW
642	11720077_AT	642.2	ENSG00000178896	EXOSC4	exosome component 4 [Source:HGNC Symbol;Acc:HGNC:18189]	AFFY_PRIMEVIEW
643	11720081_A_AT	643.1	ENSG00000183741	CBX6	chromobox 6 [Source:HGNC Symbol;Acc:HGNC:1556]	AFFY_PRIMEVIEW
644	11720090_A_AT	644.1	ENSG00000125841	NRSN2	neurensin 2 [Source:HGNC Symbol;Acc:HGNC:16229]	AFFY_PRIMEVIEW
645	11720094_A_AT	645.1	ENSG00000158290	CUL4B	cullin 4B [Source:HGNC Symbol;Acc:HGNC:2555]	AFFY_PRIMEVIEW
646	11720097_AT	646.1	ENSG00000136490	LIMD2	LIM domain containing 2 [Source:HGNC Symbol;Acc:HGNC:28142]	AFFY_PRIMEVIEW
647	11720117_A_AT	647.1	ENSG00000213445	SIPA1	signal-induced proliferation-associated 1 [Source:HGNC Symbol;Acc:HGNC:10885]	AFFY_PRIMEVIEW
648	11720118_A_AT	648.1	ENSG00000068097	HEATR6	HEAT repeat containing 6 [Source:HGNC Symbol;Acc:HGNC:24076]	AFFY_PRIMEVIEW
649	11720125_AT	649.1	ENSG00000128039	SRD5A3	steroid 5 alpha-reductase 3 [Source:HGNC Symbol;Acc:HGNC:25812]	AFFY_PRIMEVIEW
650	11720131_A_AT	650.1	ENSG00000134278	SPIRE1	spire type actin nucleation factor 1 [Source:HGNC Symbol;Acc:HGNC:30622]	AFFY_PRIMEVIEW
651	11720136_S_AT	651.1	ENSG00000133657	ATP13A3	ATPase 13A3 [Source:HGNC Symbol;Acc:HGNC:24113]	AFFY_PRIMEVIEW
652	11720137_A_AT	652.1	ENSG00000053900	ANAPC4	anaphase promoting complex subunit 4 [Source:HGNC Symbol;Acc:HGNC:19990]	AFFY_PRIMEVIEW
653	11720138_A_AT	653.1	ENSG00000189046	ALKBH2	alkB homolog 2, alpha-ketoglutarate dependent dioxygenase [Source:HGNC Symbol;Acc:HGNC:32487]	AFFY_PRIMEVIEW
654	11720144_S_AT	654.1	ENSG00000154429	CCSAP	centriole, cilia and spindle associated protein [Source:HGNC Symbol;Acc:HGNC:29578]	AFFY_PRIMEVIEW
655	11720147_A_AT	655.1	ENSG00000196730	DAPK1	death associated protein kinase 1 [Source:HGNC Symbol;Acc:HGNC:2674]	AFFY_PRIMEVIEW
656	11720151_A_AT	656.1	ENSG00000182795	C1ORF116	chromosome 1 open reading frame 116 [Source:HGNC Symbol;Acc:HGNC:28667]	AFFY_PRIMEVIEW
657	11720158_A_AT	657.1	ENSG00000157796	WDR19	WD repeat domain 19 [Source:HGNC Symbol;Acc:HGNC:18340]	AFFY_PRIMEVIEW
658	11720177_A_AT	658.1	ENSG00000165271	NOL6	nucleolar protein 6 [Source:HGNC Symbol;Acc:HGNC:19910]	AFFY_PRIMEVIEW
659	11720179_S_AT	659.1	ENSG00000182810	DDX28	DEAD-box helicase 28 [Source:HGNC Symbol;Acc:HGNC:17330]	AFFY_PRIMEVIEW
660	11720207_A_AT	660.1	ENSG00000147168	IL2RG	interleukin 2 receptor subunit gamma [Source:HGNC Symbol;Acc:HGNC:6010]	AFFY_PRIMEVIEW
661	11720212_A_AT	661.1	ENSG00000130810	PPAN	peter pan homolog (Drosophila) [Source:HGNC Symbol;Acc:HGNC:9227]	AFFY_PRIMEVIEW
661	11720212_A_AT	661.2	ENSG00000243207	PPAN-P2RY11	PPAN-P2RY11 readthrough [Source:HGNC Symbol;Acc:HGNC:33526]	AFFY_PRIMEVIEW
661	11720212_A_AT	661.3	ENSG00000238531	SNORD105B	small nucleolar RNA, C/D box 105B [Source:HGNC Symbol;Acc:HGNC:33572]	AFFY_PRIMEVIEW
662	11720215_A_AT	662.1	ENSG00000101464	PIGU	phosphatidylinositol glycan anchor biosynthesis class U [Source:HGNC Symbol;Acc:HGNC:15791]	AFFY_PRIMEVIEW
663	11720216_X_AT	663.1	ENSG00000101464	PIGU	phosphatidylinositol glycan anchor biosynthesis class U [Source:HGNC Symbol;Acc:HGNC:15791]	AFFY_PRIMEVIEW
664	11720227_A_AT	664.1	ENSG00000161179	YDJC	YdjC chitooligosaccharide deacetylase homolog [Source:HGNC Symbol;Acc:HGNC:27158]	AFFY_PRIMEVIEW
665	11720229_A_AT	665.1	ENSG00000173757	STAT5B	signal transducer and activator of transcription 5B [Source:HGNC Symbol;Acc:HGNC:11367]	AFFY_PRIMEVIEW
666	11720245_S_AT	666.1	ENSG00000205643	CDPF1	cysteine rich DPF motif domain containing 1 [Source:HGNC Symbol;Acc:HGNC:33710]	AFFY_PRIMEVIEW
667	11720272_AT	667.1	ENSG00000101098	RIMS4	regulating synaptic membrane exocytosis 4 [Source:HGNC Symbol;Acc:HGNC:16183]	AFFY_PRIMEVIEW
668	11720325_AT	668.1	ENSG00000100142	POLR2F	RNA polymerase II subunit F [Source:HGNC Symbol;Acc:HGNC:9193]	AFFY_PRIMEVIEW
669	11720330_AT	669.1	ENSG00000113460	BRIX1	BRX1, biogenesis of ribosomes [Source:HGNC Symbol;Acc:HGNC:24170]	AFFY_PRIMEVIEW
670	11720332_A_AT	670.1	ENSG00000138074	SLC5A6	solute carrier family 5 member 6 [Source:HGNC Symbol;Acc:HGNC:11041]	AFFY_PRIMEVIEW
671	11720343_AT	671.1	ENSG00000173598	NUDT4	nudix hydrolase 4 [Source:HGNC Symbol;Acc:HGNC:8051]	AFFY_PRIMEVIEW
672	11720353_S_AT	672.1	ENSG00000244405	ETV5	ETS variant 5 [Source:HGNC Symbol;Acc:HGNC:3494]	AFFY_PRIMEVIEW
673	11720366_AT	673.1	ENSG00000167807	AC011511.1	N/A	AFFY_PRIMEVIEW
673	11720366_AT	673.2	ENSG00000267673	FDX2	ferredoxin 2 [Source:HGNC Symbol;Acc:HGNC:30546]	AFFY_PRIMEVIEW
674	11720367_A_AT	674.1	ENSG00000135048	CEMIP2	cell migration inducing hyaluronidase 2 [Source:HGNC Symbol;Acc:HGNC:11869]	AFFY_PRIMEVIEW
675	11720375_A_AT	675.1	ENSG00000143363	PRUNE1	prune exopolyphosphatase 1 [Source:HGNC Symbol;Acc:HGNC:13420]	AFFY_PRIMEVIEW
676	11720382_AT	676.1	ENSG00000135823	STX6	syntaxin 6 [Source:HGNC Symbol;Acc:HGNC:11441]	AFFY_PRIMEVIEW
677	11720384_AT	677.1	ENSG00000135823	STX6	syntaxin 6 [Source:HGNC Symbol;Acc:HGNC:11441]	AFFY_PRIMEVIEW
678	11720395_A_AT	678.1	ENSG00000104320	NBN	nibrin [Source:HGNC Symbol;Acc:HGNC:7652]	AFFY_PRIMEVIEW
679	11720396_X_AT	679.1	ENSG00000104320	NBN	nibrin [Source:HGNC Symbol;Acc:HGNC:7652]	AFFY_PRIMEVIEW
680	11720412_A_AT	680.1	ENSG00000133065	SLC41A1	solute carrier family 41 member 1 [Source:HGNC Symbol;Acc:HGNC:19429]	AFFY_PRIMEVIEW
681	11720415_A_AT	681.1	ENSG00000130559	CAMSAP1	calmodulin regulated spectrin associated protein 1 [Source:HGNC Symbol;Acc:HGNC:19946]	AFFY_PRIMEVIEW
682	11720420_AT	682.1	ENSG00000072364	AFF4	AF4/FMR2 family member 4 [Source:HGNC Symbol;Acc:HGNC:17869]	AFFY_PRIMEVIEW
683	11720436_A_AT	683.1	ENSG00000011021	CLCN6	chloride voltage-gated channel 6 [Source:HGNC Symbol;Acc:HGNC:2024]	AFFY_PRIMEVIEW
684	11720443_S_AT	684.1	ENSG00000198604	BAZ1A	bromodomain adjacent to zinc finger domain 1A [Source:HGNC Symbol;Acc:HGNC:960]	AFFY_PRIMEVIEW
685	11720446_A_AT	685.1	ENSG00000165671	NSD1	nuclear receptor binding SET domain protein 1 [Source:HGNC Symbol;Acc:HGNC:14234]	AFFY_PRIMEVIEW
686	11720448_AT	686.1	ENSG00000125398	SOX9	SRY-box 9 [Source:HGNC Symbol;Acc:HGNC:11204]	AFFY_PRIMEVIEW
687	11720450_A_AT	687.1	ENSG00000108375	RNF43	ring finger protein 43 [Source:HGNC Symbol;Acc:HGNC:18505]	AFFY_PRIMEVIEW
688	11720492_A_AT	688.1	ENSG00000140694	PARN	poly(A)-specific ribonuclease [Source:HGNC Symbol;Acc:HGNC:8609]	AFFY_PRIMEVIEW
689	11720511_A_AT	689.1	ENSG00000153048	CARHSP1	calcium regulated heat stable protein 1 [Source:HGNC Symbol;Acc:HGNC:17150]	AFFY_PRIMEVIEW
690	11720523_AT	690.1	ENSG00000114767	RRP9	ribosomal RNA processing 9, U3 small nucleolar RNA binding protein [Source:HGNC Symbol;Acc:HGNC:16829]	AFFY_PRIMEVIEW
691	11720526_S_AT	691.1	ENSG00000089220	PEBP1	phosphatidylethanolamine binding protein 1 [Source:HGNC Symbol;Acc:HGNC:8630]	AFFY_PRIMEVIEW
692	11720527_AT	692.1	ENSG00000119681	LTBP2	latent transforming growth factor beta binding protein 2 [Source:HGNC Symbol;Acc:HGNC:6715]	AFFY_PRIMEVIEW
693	11720528_AT	693.1	ENSG00000119681	LTBP2	latent transforming growth factor beta binding protein 2 [Source:HGNC Symbol;Acc:HGNC:6715]	AFFY_PRIMEVIEW
694	11720529_AT	694.1	ENSG00000153814	JAZF1	JAZF zinc finger 1 [Source:HGNC Symbol;Acc:HGNC:28917]	AFFY_PRIMEVIEW
695	11720549_A_AT	695.1	ENSG00000124587	PEX6	peroxisomal biogenesis factor 6 [Source:HGNC Symbol;Acc:HGNC:8859]	AFFY_PRIMEVIEW
696	11720564_A_AT	696.1	ENSG00000166833	NAV2	neuron navigator 2 [Source:HGNC Symbol;Acc:HGNC:15997]	AFFY_PRIMEVIEW
697	11720567_A_AT	697.1	ENSG00000177380	PPFIA3	PTPRF interacting protein alpha 3 [Source:HGNC Symbol;Acc:HGNC:9247]	AFFY_PRIMEVIEW
698	11720568_X_AT	698.1	ENSG00000177380	PPFIA3	PTPRF interacting protein alpha 3 [Source:HGNC Symbol;Acc:HGNC:9247]	AFFY_PRIMEVIEW
699	11720576_A_AT	699.1	ENSG00000066777	ARFGEF1	ADP ribosylation factor guanine nucleotide exchange factor 1 [Source:HGNC Symbol;Acc:HGNC:15772]	AFFY_PRIMEVIEW
700	11720590_A_AT	700.1	ENSG00000135365	PHF21A	PHD finger protein 21A [Source:HGNC Symbol;Acc:HGNC:24156]	AFFY_PRIMEVIEW
701	11720591_A_AT	701.1	ENSG00000135365	PHF21A	PHD finger protein 21A [Source:HGNC Symbol;Acc:HGNC:24156]	AFFY_PRIMEVIEW
702	11720592_A_AT	702.1	ENSG00000147099	HDAC8	histone deacetylase 8 [Source:HGNC Symbol;Acc:HGNC:13315]	AFFY_PRIMEVIEW
703	11720597_S_AT	703.1	ENSG00000110925	CSRNP2	cysteine and serine rich nuclear protein 2 [Source:HGNC Symbol;Acc:HGNC:16006]	AFFY_PRIMEVIEW
704	11720605_A_AT	704.1	ENSG00000106628	POLD2	DNA polymerase delta 2, accessory subunit [Source:HGNC Symbol;Acc:HGNC:9176]	AFFY_PRIMEVIEW
705	11720613_A_AT	705.1	ENSG00000134014	ELP3	elongator acetyltransferase complex subunit 3 [Source:HGNC Symbol;Acc:HGNC:20696]	AFFY_PRIMEVIEW
706	11720660_S_AT	706.1	ENSG00000136807	CDK9	cyclin dependent kinase 9 [Source:HGNC Symbol;Acc:HGNC:1780]	AFFY_PRIMEVIEW
707	11720677_A_AT	707.1	ENSG00000173918	C1QTNF1	C1q and TNF related 1 [Source:HGNC Symbol;Acc:HGNC:14324]	AFFY_PRIMEVIEW
708	11720694_A_AT	708.1	ENSG00000162639	HENMT1	HEN methyltransferase 1 [Source:HGNC Symbol;Acc:HGNC:26400]	AFFY_PRIMEVIEW
709	11720697_A_AT	709.1	ENSG00000061273	HDAC7	histone deacetylase 7 [Source:HGNC Symbol;Acc:HGNC:14067]	AFFY_PRIMEVIEW
710	11720705_A_AT	710.1	ENSG00000053501	USE1	unconventional SNARE in the ER 1 [Source:HGNC Symbol;Acc:HGNC:30882]	AFFY_PRIMEVIEW
711	11720712_A_AT	711.1	ENSG00000175538	KCNE3	potassium voltage-gated channel subfamily E regulatory subunit 3 [Source:HGNC Symbol;Acc:HGNC:6243]	AFFY_PRIMEVIEW
712	11720720_A_AT	712.1	ENSG00000215012	RTL10	retrotransposon Gag like 10 [Source:HGNC Symbol;Acc:HGNC:26112]	AFFY_PRIMEVIEW
713	11720734_S_AT	713.1	ENSG00000165458	INPPL1	inositol polyphosphate phosphatase like 1 [Source:HGNC Symbol;Acc:HGNC:6080]	AFFY_PRIMEVIEW
714	11720738_AT	714.1	ENSG00000143772	ITPKB	inositol-trisphosphate 3-kinase B [Source:HGNC Symbol;Acc:HGNC:6179]	AFFY_PRIMEVIEW
715	11720763_A_AT	715.1	ENSG00000110876	SELPLG	selectin P ligand [Source:HGNC Symbol;Acc:HGNC:10722]	AFFY_PRIMEVIEW
716	11720768_AT	716.1	ENSG00000197006	METTL9	methyltransferase like 9 [Source:HGNC Symbol;Acc:HGNC:24586]	AFFY_PRIMEVIEW
717	11720775_S_AT	717.1	ENSG00000112130	RNF8	ring finger protein 8 [Source:HGNC Symbol;Acc:HGNC:10071]	AFFY_PRIMEVIEW
718	11720781_A_AT	718.1	ENSG00000123374	CDK2	cyclin dependent kinase 2 [Source:HGNC Symbol;Acc:HGNC:1771]	AFFY_PRIMEVIEW
719	11720782_A_AT	719.1	ENSG00000123374	CDK2	cyclin dependent kinase 2 [Source:HGNC Symbol;Acc:HGNC:1771]	AFFY_PRIMEVIEW
720	11720795_S_AT	720.1	ENSG00000139496	NUP58	nucleoporin 58 [Source:HGNC Symbol;Acc:HGNC:20261]	AFFY_PRIMEVIEW
721	11720847_S_AT	721.1	ENSG00000156531	PHF6	PHD finger protein 6 [Source:HGNC Symbol;Acc:HGNC:18145]	AFFY_PRIMEVIEW
722	11720896_AT	722.1	ENSG00000168758	SEMA4C	semaphorin 4C [Source:HGNC Symbol;Acc:HGNC:10731]	AFFY_PRIMEVIEW
723	11720897_AT	723.1	ENSG00000168758	SEMA4C	semaphorin 4C [Source:HGNC Symbol;Acc:HGNC:10731]	AFFY_PRIMEVIEW
724	11720909_A_AT	724.1	ENSG00000145014	TMEM44	transmembrane protein 44 [Source:HGNC Symbol;Acc:HGNC:25120]	AFFY_PRIMEVIEW
725	11720933_S_AT	725.1	ENSG00000164535	DAGLB	diacylglycerol lipase beta [Source:HGNC Symbol;Acc:HGNC:28923]	AFFY_PRIMEVIEW
726	11720934_A_AT	726.1	ENSG00000164535	DAGLB	diacylglycerol lipase beta [Source:HGNC Symbol;Acc:HGNC:28923]	AFFY_PRIMEVIEW
727	11720939_A_AT	727.1	ENSG00000276908	MIR7106	microRNA 7106 [Source:HGNC Symbol;Acc:HGNC:50085]	AFFY_PRIMEVIEW
727	11720939_A_AT	727.2	ENSG00000123064	DDX54	DEAD-box helicase 54 [Source:HGNC Symbol;Acc:HGNC:20084]	AFFY_PRIMEVIEW
728	11720940_AT	728.1	ENSG00000123064	DDX54	DEAD-box helicase 54 [Source:HGNC Symbol;Acc:HGNC:20084]	AFFY_PRIMEVIEW
729	11720941_AT	729.1	ENSG00000123064	DDX54	DEAD-box helicase 54 [Source:HGNC Symbol;Acc:HGNC:20084]	AFFY_PRIMEVIEW
730	11720942_X_AT	730.1	ENSG00000123064	DDX54	DEAD-box helicase 54 [Source:HGNC Symbol;Acc:HGNC:20084]	AFFY_PRIMEVIEW
731	11720943_A_AT	731.1	ENSG00000143333	RGS16	regulator of G protein signaling 16 [Source:HGNC Symbol;Acc:HGNC:9997]	AFFY_PRIMEVIEW
732	11720944_AT	732.1	ENSG00000143333	RGS16	regulator of G protein signaling 16 [Source:HGNC Symbol;Acc:HGNC:9997]	AFFY_PRIMEVIEW
733	11720945_X_AT	733.1	ENSG00000144158	AL078621.1	N/A	AFFY_PRIMEVIEW
733	11720945_X_AT	733.2	ENSG00000131876	SNRPA1	small nuclear ribonucleoprotein polypeptide A' [Source:HGNC Symbol;Acc:HGNC:11152]	AFFY_PRIMEVIEW
734	11720954_S_AT	734.1	ENSG00000156482	RPL30	ribosomal protein L30 [Source:HGNC Symbol;Acc:HGNC:10333]	AFFY_PRIMEVIEW
735	11720957_A_AT	735.1	ENSG00000263528	IKBKE	inhibitor of nuclear factor kappa B kinase subunit epsilon [Source:HGNC Symbol;Acc:HGNC:14552]	AFFY_PRIMEVIEW
736	11720967_A_AT	736.1	ENSG00000121957	GPSM2	G protein signaling modulator 2 [Source:HGNC Symbol;Acc:HGNC:29501]	AFFY_PRIMEVIEW
737	11720970_AT	737.1	ENSG00000131747	TOP2A	DNA topoisomerase II alpha [Source:HGNC Symbol;Acc:HGNC:11989]	AFFY_PRIMEVIEW
738	11720984_AT	738.1	ENSG00000221890	NPTXR	neuronal pentraxin receptor [Source:HGNC Symbol;Acc:HGNC:7954]	AFFY_PRIMEVIEW
739	11720994_X_AT	739.1	ENSG00000277632	CCL3	C-C motif chemokine ligand 3 [Source:HGNC Symbol;Acc:HGNC:10627]	AFFY_PRIMEVIEW
740	11721016_A_AT	740.1	ENSG00000111667	USP5	ubiquitin specific peptidase 5 [Source:HGNC Symbol;Acc:HGNC:12628]	AFFY_PRIMEVIEW
741	11721017_AT	741.1	ENSG00000112787	FBRSL1	fibrosin like 1 [Source:HGNC Symbol;Acc:HGNC:29308]	AFFY_PRIMEVIEW
742	11721034_AT	742.1	ENSG00000173281	PPP1R3B	protein phosphatase 1 regulatory subunit 3B [Source:HGNC Symbol;Acc:HGNC:14942]	AFFY_PRIMEVIEW
743	11721036_AT	743.1	ENSG00000107882	SUFU	SUFU negative regulator of hedgehog signaling [Source:HGNC Symbol;Acc:HGNC:16466]	AFFY_PRIMEVIEW
744	11721037_A_AT	744.1	ENSG00000107882	SUFU	SUFU negative regulator of hedgehog signaling [Source:HGNC Symbol;Acc:HGNC:16466]	AFFY_PRIMEVIEW
745	11721048_S_AT	745.1	ENSG00000150456	EEF1AKMT1	EEF1A lysine methyltransferase 1 [Source:HGNC Symbol;Acc:HGNC:27351]	AFFY_PRIMEVIEW
746	11721050_A_AT	746.1	ENSG00000128159	TUBGCP6	tubulin gamma complex associated protein 6 [Source:HGNC Symbol;Acc:HGNC:18127]	AFFY_PRIMEVIEW
747	11721051_AT	747.1	ENSG00000205765	C5ORF51	chromosome 5 open reading frame 51 [Source:HGNC Symbol;Acc:HGNC:27750]	AFFY_PRIMEVIEW
748	11721062_S_AT	748.1	ENSG00000124198	ARFGEF2	ADP ribosylation factor guanine nucleotide exchange factor 2 [Source:HGNC Symbol;Acc:HGNC:15853]	AFFY_PRIMEVIEW
749	11721079_A_AT	749.1	ENSG00000132424	PNISR	PNN interacting serine and arginine rich protein [Source:HGNC Symbol;Acc:HGNC:21222]	AFFY_PRIMEVIEW
750	11721083_X_AT	750.1	ENSG00000179933	C14ORF119	chromosome 14 open reading frame 119 [Source:HGNC Symbol;Acc:HGNC:20270]	AFFY_PRIMEVIEW
751	11721091_A_AT	751.1	ENSG00000137801	THBS1	thrombospondin 1 [Source:HGNC Symbol;Acc:HGNC:11785]	AFFY_PRIMEVIEW
752	11721107_A_AT	752.1	ENSG00000170638	TRABD	TraB domain containing [Source:HGNC Symbol;Acc:HGNC:28805]	AFFY_PRIMEVIEW
753	11721116_X_AT	753.1	ENSG00000129128	SPCS3	signal peptidase complex subunit 3 [Source:HGNC Symbol;Acc:HGNC:26212]	AFFY_PRIMEVIEW
754	11721119_A_AT	754.1	ENSG00000131503	ANKHD1	ankyrin repeat and KH domain containing 1 [Source:HGNC Symbol;Acc:HGNC:24714]	AFFY_PRIMEVIEW
754	11721119_A_AT	754.2	ENSG00000254996	ANKHD1-EIF4EBP3	ANKHD1-EIF4EBP3 readthrough [Source:HGNC Symbol;Acc:HGNC:33530]	AFFY_PRIMEVIEW
755	11721126_A_AT	755.1	ENSG00000138792	ENPEP	glutamyl aminopeptidase [Source:HGNC Symbol;Acc:HGNC:3355]	AFFY_PRIMEVIEW
756	11721127_AT	756.1	ENSG00000138792	ENPEP	glutamyl aminopeptidase [Source:HGNC Symbol;Acc:HGNC:3355]	AFFY_PRIMEVIEW
757	11721132_AT	757.1	ENSG00000172534	HCFC1	host cell factor C1 [Source:HGNC Symbol;Acc:HGNC:4839]	AFFY_PRIMEVIEW
758	11721139_A_AT	758.1	ENSG00000198276	UCKL1	uridine-cytidine kinase 1 like 1 [Source:HGNC Symbol;Acc:HGNC:15938]	AFFY_PRIMEVIEW
759	11721143_A_AT	759.1	ENSG00000148773	MKI67	marker of proliferation Ki-67 [Source:HGNC Symbol;Acc:HGNC:7107]	AFFY_PRIMEVIEW
760	11721148_AT	760.1	ENSG00000100321	SYNGR1	synaptogyrin 1 [Source:HGNC Symbol;Acc:HGNC:11498]	AFFY_PRIMEVIEW
761	11721152_A_AT	761.1	ENSG00000104375	STK3	serine/threonine kinase 3 [Source:HGNC Symbol;Acc:HGNC:11406]	AFFY_PRIMEVIEW
762	11721157_AT	762.1	ENSG00000065057	NTHL1	nth like DNA glycosylase 1 [Source:HGNC Symbol;Acc:HGNC:8028]	AFFY_PRIMEVIEW
763	11721184_AT	763.1	ENSG00000158457	TSPAN33	tetraspanin 33 [Source:HGNC Symbol;Acc:HGNC:28743]	AFFY_PRIMEVIEW
764	11721186_A_AT	764.1	ENSG00000100949	RABGGTA	Rab geranylgeranyltransferase subunit alpha [Source:HGNC Symbol;Acc:HGNC:9795]	AFFY_PRIMEVIEW
765	11721187_A_AT	765.1	ENSG00000131089	ARHGEF9	Cdc42 guanine nucleotide exchange factor 9 [Source:HGNC Symbol;Acc:HGNC:14561]	AFFY_PRIMEVIEW
766	11721192_AT	766.1	ENSG00000122863	CHST3	carbohydrate sulfotransferase 3 [Source:HGNC Symbol;Acc:HGNC:1971]	AFFY_PRIMEVIEW
767	11721193_AT	767.1	ENSG00000122863	CHST3	carbohydrate sulfotransferase 3 [Source:HGNC Symbol;Acc:HGNC:1971]	AFFY_PRIMEVIEW
768	11721195_S_AT	768.1	ENSG00000160208	RRP1B	ribosomal RNA processing 1B [Source:HGNC Symbol;Acc:HGNC:23818]	AFFY_PRIMEVIEW
769	11721197_S_AT	769.1	ENSG00000166341	DCHS1	dachsous cadherin-related 1 [Source:HGNC Symbol;Acc:HGNC:13681]	AFFY_PRIMEVIEW
770	11721200_AT	770.1	ENSG00000116525	TRIM62	tripartite motif containing 62 [Source:HGNC Symbol;Acc:HGNC:25574]	AFFY_PRIMEVIEW
771	11721203_AT	771.1	ENSG00000244486	SCARF2	scavenger receptor class F member 2 [Source:HGNC Symbol;Acc:HGNC:19869]	AFFY_PRIMEVIEW
772	11721213_A_AT	772.1	ENSG00000106665	CLIP2	CAP-Gly domain containing linker protein 2 [Source:HGNC Symbol;Acc:HGNC:2586]	AFFY_PRIMEVIEW
773	11721216_S_AT	773.1	ENSG00000106460	TMEM106B	transmembrane protein 106B [Source:HGNC Symbol;Acc:HGNC:22407]	AFFY_PRIMEVIEW
774	11721249_A_AT	774.1	ENSG00000186469	GNG2	G protein subunit gamma 2 [Source:HGNC Symbol;Acc:HGNC:4404]	AFFY_PRIMEVIEW
775	11721257_AT	775.1	ENSG00000110092	CCND1	cyclin D1 [Source:HGNC Symbol;Acc:HGNC:1582]	AFFY_PRIMEVIEW
776	11721289_AT	776.1	N/A	N/A	N/A	N/A
777	11721312_A_AT	777.1	ENSG00000177556	ATOX1	antioxidant 1 copper chaperone [Source:HGNC Symbol;Acc:HGNC:798]	AFFY_PRIMEVIEW
778	11721322_AT	778.1	ENSG00000110057	UNC93B1	unc-93 homolog B1, TLR signaling regulator [Source:HGNC Symbol;Acc:HGNC:13481]	AFFY_PRIMEVIEW
779	11721344_A_AT	779.1	ENSG00000162438	CTRC	chymotrypsin C [Source:HGNC Symbol;Acc:HGNC:2523]	AFFY_PRIMEVIEW
780	11721357_AT	780.1	ENSG00000197696	NMB	neuromedin B [Source:HGNC Symbol;Acc:HGNC:7842]	AFFY_PRIMEVIEW
781	11721358_A_AT	781.1	ENSG00000055957	ITIH1	inter-alpha-trypsin inhibitor heavy chain 1 [Source:HGNC Symbol;Acc:HGNC:6166]	AFFY_PRIMEVIEW
782	11721370_AT	782.1	ENSG00000152284	TCF7L1	transcription factor 7 like 1 [Source:HGNC Symbol;Acc:HGNC:11640]	AFFY_PRIMEVIEW
783	11721371_X_AT	783.1	ENSG00000152284	TCF7L1	transcription factor 7 like 1 [Source:HGNC Symbol;Acc:HGNC:11640]	AFFY_PRIMEVIEW
784	11721379_A_AT	784.1	ENSG00000110811	P3H3	prolyl 3-hydroxylase 3 [Source:HGNC Symbol;Acc:HGNC:19318]	AFFY_PRIMEVIEW
785	11721384_AT	785.1	ENSG00000066739	ATG2B	autophagy related 2B [Source:HGNC Symbol;Acc:HGNC:20187]	AFFY_PRIMEVIEW
786	11721390_AT	786.1	ENSG00000170801	HTRA3	HtrA serine peptidase 3 [Source:HGNC Symbol;Acc:HGNC:30406]	AFFY_PRIMEVIEW
787	11721391_AT	787.1	ENSG00000198933	TBKBP1	TBK1 binding protein 1 [Source:HGNC Symbol;Acc:HGNC:30140]	AFFY_PRIMEVIEW
788	11721398_A_AT	788.1	ENSG00000104885	DOT1L	DOT1 like histone lysine methyltransferase [Source:HGNC Symbol;Acc:HGNC:24948]	AFFY_PRIMEVIEW
789	11721430_A_AT	789.1	ENSG00000147642	SYBU	syntabulin [Source:HGNC Symbol;Acc:HGNC:26011]	AFFY_PRIMEVIEW
790	11721431_A_AT	790.1	ENSG00000147642	SYBU	syntabulin [Source:HGNC Symbol;Acc:HGNC:26011]	AFFY_PRIMEVIEW
791	11721432_A_AT	791.1	ENSG00000130479	MAP1S	microtubule associated protein 1S [Source:HGNC Symbol;Acc:HGNC:15715]	AFFY_PRIMEVIEW
792	11721435_AT	792.1	ENSG00000113739	STC2	stanniocalcin 2 [Source:HGNC Symbol;Acc:HGNC:11374]	AFFY_PRIMEVIEW
793	11721436_A_AT	793.1	ENSG00000113739	STC2	stanniocalcin 2 [Source:HGNC Symbol;Acc:HGNC:11374]	AFFY_PRIMEVIEW
794	11721437_A_AT	794.1	ENSG00000113739	STC2	stanniocalcin 2 [Source:HGNC Symbol;Acc:HGNC:11374]	AFFY_PRIMEVIEW
795	11721444_A_AT	795.1	ENSG00000094880	CDC23	cell division cycle 23 [Source:HGNC Symbol;Acc:HGNC:1724]	AFFY_PRIMEVIEW
796	11721455_S_AT	796.1	ENSG00000197249	SERPINA1	serpin family A member 1 [Source:HGNC Symbol;Acc:HGNC:8941]	AFFY_PRIMEVIEW
797	11721456_X_AT	797.1	ENSG00000197249	SERPINA1	serpin family A member 1 [Source:HGNC Symbol;Acc:HGNC:8941]	AFFY_PRIMEVIEW
798	11721464_X_AT	798.1	ENSG00000130703	OSBPL2	oxysterol binding protein like 2 [Source:HGNC Symbol;Acc:HGNC:15761]	AFFY_PRIMEVIEW
799	11721485_AT	799.1	ENSG00000172315	TP53RK	TP53 regulating kinase [Source:HGNC Symbol;Acc:HGNC:16197]	AFFY_PRIMEVIEW
800	11721486_AT	800.1	ENSG00000172315	TP53RK	TP53 regulating kinase [Source:HGNC Symbol;Acc:HGNC:16197]	AFFY_PRIMEVIEW
801	11721489_A_AT	801.1	ENSG00000125733	TRIP10	thyroid hormone receptor interactor 10 [Source:HGNC Symbol;Acc:HGNC:12304]	AFFY_PRIMEVIEW
802	11721493_A_AT	802.1	ENSG00000196562	SULF2	sulfatase 2 [Source:HGNC Symbol;Acc:HGNC:20392]	AFFY_PRIMEVIEW
803	11721494_AT	803.1	ENSG00000136709	WDR33	WD repeat domain 33 [Source:HGNC Symbol;Acc:HGNC:25651]	AFFY_PRIMEVIEW
804	11721507_AT	804.1	ENSG00000161202	DVL3	dishevelled segment polarity protein 3 [Source:HGNC Symbol;Acc:HGNC:3087]	AFFY_PRIMEVIEW
805	11721518_AT	805.1	ENSG00000249129	SUDS3P1	SDS3 homolog, SIN3A corepressor complex component pseudogene 1 [Source:HGNC Symbol;Acc:HGNC:44000]	AFFY_PRIMEVIEW
805	11721518_AT	805.2	ENSG00000111707	SUDS3	SDS3 homolog, SIN3A corepressor complex component [Source:HGNC Symbol;Acc:HGNC:29545]	AFFY_PRIMEVIEW
806	11721526_A_AT	806.1	ENSG00000120685	PROSER1	proline and serine rich 1 [Source:HGNC Symbol;Acc:HGNC:20291]	AFFY_PRIMEVIEW
807	11721527_A_AT	807.1	ENSG00000120685	PROSER1	proline and serine rich 1 [Source:HGNC Symbol;Acc:HGNC:20291]	AFFY_PRIMEVIEW
808	11721539_AT	808.1	ENSG00000139998	RAB15	RAB15, member RAS oncogene family [Source:HGNC Symbol;Acc:HGNC:20150]	AFFY_PRIMEVIEW
809	11721556_AT	809.1	ENSG00000149489	ROM1	retinal outer segment membrane protein 1 [Source:HGNC Symbol;Acc:HGNC:10254]	AFFY_PRIMEVIEW
810	11721559_S_AT	810.1	ENSG00000075292	ZNF638	zinc finger protein 638 [Source:HGNC Symbol;Acc:HGNC:17894]	AFFY_PRIMEVIEW
810	11721559_S_AT	810.2	ENSG00000104626	ERI1	exoribonuclease 1 [Source:HGNC Symbol;Acc:HGNC:23994]	AFFY_PRIMEVIEW
811	11721567_A_AT	811.1	ENSG00000062822	POLD1	DNA polymerase delta 1, catalytic subunit [Source:HGNC Symbol;Acc:HGNC:9175]	AFFY_PRIMEVIEW
811	11721567_A_AT	811.2	ENSG00000142539	AC020909.1	N/A	AFFY_PRIMEVIEW
812	11721577_AT	812.1	ENSG00000232810	TNF	tumor necrosis factor [Source:HGNC Symbol;Acc:HGNC:11892]	AFFY_PRIMEVIEW
813	11721584_A_AT	813.1	ENSG00000172765	TMCC1	transmembrane and coiled-coil domain family 1 [Source:HGNC Symbol;Acc:HGNC:29116]	AFFY_PRIMEVIEW
814	11721585_A_AT	814.1	ENSG00000172765	TMCC1	transmembrane and coiled-coil domain family 1 [Source:HGNC Symbol;Acc:HGNC:29116]	AFFY_PRIMEVIEW
815	11721587_AT	815.1	ENSG00000056558	TRAF1	TNF receptor associated factor 1 [Source:HGNC Symbol;Acc:HGNC:12031]	AFFY_PRIMEVIEW
816	11721588_AT	816.1	ENSG00000056558	TRAF1	TNF receptor associated factor 1 [Source:HGNC Symbol;Acc:HGNC:12031]	AFFY_PRIMEVIEW
817	11721591_A_AT	817.1	ENSG00000158169	FANCC	Fanconi anemia complementation group C [Source:HGNC Symbol;Acc:HGNC:3584]	AFFY_PRIMEVIEW
818	11721593_AT	818.1	ENSG00000175264	CHST1	carbohydrate sulfotransferase 1 [Source:HGNC Symbol;Acc:HGNC:1969]	AFFY_PRIMEVIEW
819	11721595_A_AT	819.1	ENSG00000147799	ARHGAP39	Rho GTPase activating protein 39 [Source:HGNC Symbol;Acc:HGNC:29351]	AFFY_PRIMEVIEW
820	11721607_AT	820.1	ENSG00000109756	RAPGEF2	Rap guanine nucleotide exchange factor 2 [Source:HGNC Symbol;Acc:HGNC:16854]	AFFY_PRIMEVIEW
821	11721610_A_AT	821.1	ENSG00000198920	KIAA0753	KIAA0753 [Source:HGNC Symbol;Acc:HGNC:29110]	AFFY_PRIMEVIEW
822	11721611_A_AT	822.1	ENSG00000086200	IPO11	importin 11 [Source:HGNC Symbol;Acc:HGNC:20628]	AFFY_PRIMEVIEW
823	11721617_X_AT	823.1	ENSG00000130775	THEMIS2	thymocyte selection associated family member 2 [Source:HGNC Symbol;Acc:HGNC:16839]	AFFY_PRIMEVIEW
824	11721619_AT	824.1	ENSG00000129654	FOXJ1	forkhead box J1 [Source:HGNC Symbol;Acc:HGNC:3816]	AFFY_PRIMEVIEW
825	11721624_S_AT	825.1	ENSG00000109046	WSB1	WD repeat and SOCS box containing 1 [Source:HGNC Symbol;Acc:HGNC:19221]	AFFY_PRIMEVIEW
826	11721640_X_AT	826.1	ENSG00000127220	ABHD8	abhydrolase domain containing 8 [Source:HGNC Symbol;Acc:HGNC:23759]	AFFY_PRIMEVIEW
827	11721652_A_AT	827.1	ENSG00000026652	AGPAT4	1-acylglycerol-3-phosphate O-acyltransferase 4 [Source:HGNC Symbol;Acc:HGNC:20885]	AFFY_PRIMEVIEW
828	11721670_A_AT	828.1	ENSG00000162302	RPS6KA4	ribosomal protein S6 kinase A4 [Source:HGNC Symbol;Acc:HGNC:10433]	AFFY_PRIMEVIEW
829	11721672_AT	829.1	ENSG00000132661	NXT1	nuclear transport factor 2 like export factor 1 [Source:HGNC Symbol;Acc:HGNC:15913]	AFFY_PRIMEVIEW
830	11721676_A_AT	830.1	ENSG00000139637	C12ORF10	chromosome 12 open reading frame 10 [Source:HGNC Symbol;Acc:HGNC:17590]	AFFY_PRIMEVIEW
831	11721682_S_AT	831.1	ENSG00000134597	RBMX2	RNA binding motif protein X-linked 2 [Source:HGNC Symbol;Acc:HGNC:24282]	AFFY_PRIMEVIEW
832	11721689_X_AT	832.1	ENSG00000172201	ID4	inhibitor of DNA binding 4, HLH protein [Source:HGNC Symbol;Acc:HGNC:5363]	AFFY_PRIMEVIEW
833	11721692_X_AT	833.1	ENSG00000008283	CYB561	cytochrome b561 [Source:HGNC Symbol;Acc:HGNC:2571]	AFFY_PRIMEVIEW
834	11721695_S_AT	834.1	ENSG00000158050	DUSP2	dual specificity phosphatase 2 [Source:HGNC Symbol;Acc:HGNC:3068]	AFFY_PRIMEVIEW
835	11721697_A_AT	835.1	ENSG00000151148	UBE3B	ubiquitin protein ligase E3B [Source:HGNC Symbol;Acc:HGNC:13478]	AFFY_PRIMEVIEW
836	11721698_A_AT	836.1	ENSG00000151148	UBE3B	ubiquitin protein ligase E3B [Source:HGNC Symbol;Acc:HGNC:13478]	AFFY_PRIMEVIEW
837	11721715_S_AT	837.1	ENSG00000085224	ATRX	ATRX, chromatin remodeler [Source:HGNC Symbol;Acc:HGNC:886]	AFFY_PRIMEVIEW
838	11721724_A_AT	838.1	ENSG00000149328	GLB1L2	galactosidase beta 1 like 2 [Source:HGNC Symbol;Acc:HGNC:25129]	AFFY_PRIMEVIEW
839	11721729_A_AT	839.1	ENSG00000121753	ADGRB2	adhesion G protein-coupled receptor B2 [Source:HGNC Symbol;Acc:HGNC:944]	AFFY_PRIMEVIEW
840	11721731_A_AT	840.1	ENSG00000166479	TMX3	thioredoxin related transmembrane protein 3 [Source:HGNC Symbol;Acc:HGNC:24718]	AFFY_PRIMEVIEW
841	11721737_A_AT	841.1	ENSG00000127863	TNFRSF19	TNF receptor superfamily member 19 [Source:HGNC Symbol;Acc:HGNC:11915]	AFFY_PRIMEVIEW
842	11721740_AT	842.1	ENSG00000162738	VANGL2	VANGL planar cell polarity protein 2 [Source:HGNC Symbol;Acc:HGNC:15511]	AFFY_PRIMEVIEW
843	11721748_A_AT	843.1	ENSG00000203485	INF2	inverted formin, FH2 and WH2 domain containing [Source:HGNC Symbol;Acc:HGNC:23791]	AFFY_PRIMEVIEW
844	11721749_S_AT	844.1	ENSG00000203485	INF2	inverted formin, FH2 and WH2 domain containing [Source:HGNC Symbol;Acc:HGNC:23791]	AFFY_PRIMEVIEW
845	11721763_AT	845.1	ENSG00000100077	GRK3	G protein-coupled receptor kinase 3 [Source:HGNC Symbol;Acc:HGNC:290]	AFFY_PRIMEVIEW
846	11721765_AT	846.1	ENSG00000100077	GRK3	G protein-coupled receptor kinase 3 [Source:HGNC Symbol;Acc:HGNC:290]	AFFY_PRIMEVIEW
847	11721772_AT	847.1	ENSG00000114933	INO80D	INO80 complex subunit D [Source:HGNC Symbol;Acc:HGNC:25997]	AFFY_PRIMEVIEW
848	11721791_A_AT	848.1	ENSG00000153707	PTPRD	protein tyrosine phosphatase, receptor type D [Source:HGNC Symbol;Acc:HGNC:9668]	AFFY_PRIMEVIEW
849	11721848_AT	849.1	ENSG00000132563	REEP2	receptor accessory protein 2 [Source:HGNC Symbol;Acc:HGNC:17975]	AFFY_PRIMEVIEW
850	11721850_A_AT	850.1	ENSG00000159685	CHCHD6	coiled-coil-helix-coiled-coil-helix domain containing 6 [Source:HGNC Symbol;Acc:HGNC:28184]	AFFY_PRIMEVIEW
851	11721864_S_AT	851.1	ENSG00000157800	SLC37A3	solute carrier family 37 member 3 [Source:HGNC Symbol;Acc:HGNC:20651]	AFFY_PRIMEVIEW
852	11721871_S_AT	852.1	ENSG00000166135	HIF1AN	hypoxia inducible factor 1 subunit alpha inhibitor [Source:HGNC Symbol;Acc:HGNC:17113]	AFFY_PRIMEVIEW
853	11721875_AT	853.1	ENSG00000151012	SLC7A11	solute carrier family 7 member 11 [Source:HGNC Symbol;Acc:HGNC:11059]	AFFY_PRIMEVIEW
854	11721876_S_AT	854.1	ENSG00000151012	SLC7A11	solute carrier family 7 member 11 [Source:HGNC Symbol;Acc:HGNC:11059]	AFFY_PRIMEVIEW
855	11721882_S_AT	855.1	ENSG00000126216	TUBGCP3	tubulin gamma complex associated protein 3 [Source:HGNC Symbol;Acc:HGNC:18598]	AFFY_PRIMEVIEW
856	11721890_S_AT	856.1	ENSG00000072071	ADGRL1	adhesion G protein-coupled receptor L1 [Source:HGNC Symbol;Acc:HGNC:20973]	AFFY_PRIMEVIEW
857	11721892_A_AT	857.1	ENSG00000153107	ANAPC1	anaphase promoting complex subunit 1 [Source:HGNC Symbol;Acc:HGNC:19988]	AFFY_PRIMEVIEW
857	11721892_A_AT	857.2	ENSG00000204745	AC083899.1	N/A	AFFY_PRIMEVIEW
858	11721900_AT	858.1	ENSG00000085265	FCN1	ficolin 1 [Source:HGNC Symbol;Acc:HGNC:3623]	AFFY_PRIMEVIEW
859	11721901_A_AT	859.1	ENSG00000153406	NMRAL1	NmrA like redox sensor 1 [Source:HGNC Symbol;Acc:HGNC:24987]	AFFY_PRIMEVIEW
860	11721904_A_AT	860.1	ENSG00000160050	CCDC28B	coiled-coil domain containing 28B [Source:HGNC Symbol;Acc:HGNC:28163]	AFFY_PRIMEVIEW
861	11721912_AT	861.1	ENSG00000198625	MDM4	MDM4, p53 regulator [Source:HGNC Symbol;Acc:HGNC:6974]	AFFY_PRIMEVIEW
862	11721913_X_AT	862.1	ENSG00000198625	MDM4	MDM4, p53 regulator [Source:HGNC Symbol;Acc:HGNC:6974]	AFFY_PRIMEVIEW
863	11721915_A_AT	863.1	ENSG00000198625	MDM4	MDM4, p53 regulator [Source:HGNC Symbol;Acc:HGNC:6974]	AFFY_PRIMEVIEW
864	11721919_X_AT	864.1	ENSG00000159363	ATP13A2	ATPase cation transporting 13A2 [Source:HGNC Symbol;Acc:HGNC:30213]	AFFY_PRIMEVIEW
865	11721931_S_AT	865.1	ENSG00000133069	TMCC2	transmembrane and coiled-coil domain family 2 [Source:HGNC Symbol;Acc:HGNC:24239]	AFFY_PRIMEVIEW
866	11721938_AT	866.1	ENSG00000166439	RNF169	ring finger protein 169 [Source:HGNC Symbol;Acc:HGNC:26961]	AFFY_PRIMEVIEW
867	11721949_S_AT	867.1	ENSG00000118873	RAB3GAP2	RAB3 GTPase activating non-catalytic protein subunit 2 [Source:HGNC Symbol;Acc:HGNC:17168]	AFFY_PRIMEVIEW
868	11721972_AT	868.1	ENSG00000102221	JADE3	jade family PHD finger 3 [Source:HGNC Symbol;Acc:HGNC:22982]	AFFY_PRIMEVIEW
869	11721973_AT	869.1	ENSG00000102221	JADE3	jade family PHD finger 3 [Source:HGNC Symbol;Acc:HGNC:22982]	AFFY_PRIMEVIEW
870	11721988_AT	870.1	ENSG00000163617	CCDC191	coiled-coil domain containing 191 [Source:HGNC Symbol;Acc:HGNC:29272]	AFFY_PRIMEVIEW
871	11721995_A_AT	871.1	ENSG00000137507	LRRC32	leucine rich repeat containing 32 [Source:HGNC Symbol;Acc:HGNC:4161]	AFFY_PRIMEVIEW
872	11722002_A_AT	872.1	ENSG00000153187	HNRNPU	heterogeneous nuclear ribonucleoprotein U [Source:HGNC Symbol;Acc:HGNC:5048]	AFFY_PRIMEVIEW
873	11722005_A_AT	873.1	ENSG00000132780	NASP	nuclear autoantigenic sperm protein [Source:HGNC Symbol;Acc:HGNC:7644]	AFFY_PRIMEVIEW
874	11722014_A_AT	874.1	ENSG00000150316	CWC15	CWC15 spliceosome associated protein homolog [Source:HGNC Symbol;Acc:HGNC:26939]	AFFY_PRIMEVIEW
875	11722017_X_AT	875.1	ENSG00000173391	OLR1	oxidized low density lipoprotein receptor 1 [Source:HGNC Symbol;Acc:HGNC:8133]	AFFY_PRIMEVIEW
876	11722022_S_AT	876.1	ENSG00000176749	CDK5R1	cyclin dependent kinase 5 regulatory subunit 1 [Source:HGNC Symbol;Acc:HGNC:1775]	AFFY_PRIMEVIEW
877	11722026_A_AT	877.1	ENSG00000183751	TBL3	transducin beta like 3 [Source:HGNC Symbol;Acc:HGNC:11587]	AFFY_PRIMEVIEW
878	11722033_A_AT	878.1	ENSG00000124067	SLC12A4	solute carrier family 12 member 4 [Source:HGNC Symbol;Acc:HGNC:10913]	AFFY_PRIMEVIEW
879	11722036_A_AT	879.1	ENSG00000197157	SND1	staphylococcal nuclease and tudor domain containing 1 [Source:HGNC Symbol;Acc:HGNC:30646]	AFFY_PRIMEVIEW
880	11722053_A_AT	880.1	ENSG00000124588	NQO2	N-ribosyldihydronicotinamide:quinone reductase 2 [Source:HGNC Symbol;Acc:HGNC:7856]	AFFY_PRIMEVIEW
881	11722060_AT	881.1	ENSG00000135447	PPP1R1A	protein phosphatase 1 regulatory inhibitor subunit 1A [Source:HGNC Symbol;Acc:HGNC:9286]	AFFY_PRIMEVIEW
882	11722068_A_AT	882.1	ENSG00000131037	EPS8L1	EPS8 like 1 [Source:HGNC Symbol;Acc:HGNC:21295]	AFFY_PRIMEVIEW
883	11722074_S_AT	883.1	ENSG00000163909	HEYL	hes related family bHLH transcription factor with YRPW motif-like [Source:HGNC Symbol;Acc:HGNC:4882]	AFFY_PRIMEVIEW
884	11722075_AT	884.1	N/A	N/A	N/A	N/A
885	11722089_A_AT	885.1	ENSG00000149499	EML3	echinoderm microtubule associated protein like 3 [Source:HGNC Symbol;Acc:HGNC:26666]	AFFY_PRIMEVIEW
886	11722090_A_AT	886.1	ENSG00000243364	EFNA4	ephrin A4 [Source:HGNC Symbol;Acc:HGNC:3224]	AFFY_PRIMEVIEW
887	11722092_X_AT	887.1	ENSG00000186654	PRR5	proline rich 5 [Source:HGNC Symbol;Acc:HGNC:31682]	AFFY_PRIMEVIEW
888	11722095_A_AT	888.1	ENSG00000116852	KIF21B	kinesin family member 21B [Source:HGNC Symbol;Acc:HGNC:29442]	AFFY_PRIMEVIEW
889	11722104_A_AT	889.1	ENSG00000163870	TPRA1	transmembrane protein adipocyte associated 1 [Source:HGNC Symbol;Acc:HGNC:30413]	AFFY_PRIMEVIEW
890	11722106_A_AT	890.1	ENSG00000100731	PCNX1	pecanex homolog 1 [Source:HGNC Symbol;Acc:HGNC:19740]	AFFY_PRIMEVIEW
891	11722119_AT	891.1	ENSG00000061337	LZTS1	leucine zipper tumor suppressor 1 [Source:HGNC Symbol;Acc:HGNC:13861]	AFFY_PRIMEVIEW
892	11722120_A_AT	892.1	ENSG00000184445	KNTC1	kinetochore associated 1 [Source:HGNC Symbol;Acc:HGNC:17255]	AFFY_PRIMEVIEW
893	11722123_A_AT	893.1	ENSG00000111012	CYP27B1	cytochrome P450 family 27 subfamily B member 1 [Source:HGNC Symbol;Acc:HGNC:2606]	AFFY_PRIMEVIEW
894	11722126_A_AT	894.1	ENSG00000154781	CCDC174	coiled-coil domain containing 174 [Source:HGNC Symbol;Acc:HGNC:28033]	AFFY_PRIMEVIEW
895	11722135_A_AT	895.1	ENSG00000100294	MCAT	malonyl-CoA-acyl carrier protein transacylase [Source:HGNC Symbol;Acc:HGNC:29622]	AFFY_PRIMEVIEW
896	11722141_AT	896.1	ENSG00000104856	RELB	RELB proto-oncogene, NF-kB subunit [Source:HGNC Symbol;Acc:HGNC:9956]	AFFY_PRIMEVIEW
897	11722144_AT	897.1	ENSG00000135913	USP37	ubiquitin specific peptidase 37 [Source:HGNC Symbol;Acc:HGNC:20063]	AFFY_PRIMEVIEW
898	11722157_A_AT	898.1	ENSG00000152669	CCNO	cyclin O [Source:HGNC Symbol;Acc:HGNC:18576]	AFFY_PRIMEVIEW
899	11722160_A_AT	899.1	ENSG00000106070	GRB10	growth factor receptor bound protein 10 [Source:HGNC Symbol;Acc:HGNC:4564]	AFFY_PRIMEVIEW
900	11722161_S_AT	900.1	ENSG00000130699	TAF4	TATA-box binding protein associated factor 4 [Source:HGNC Symbol;Acc:HGNC:11537]	AFFY_PRIMEVIEW
901	11722168_A_AT	901.1	ENSG00000124207	CSE1L	chromosome segregation 1 like [Source:HGNC Symbol;Acc:HGNC:2431]	AFFY_PRIMEVIEW
902	11722169_X_AT	902.1	ENSG00000124207	CSE1L	chromosome segregation 1 like [Source:HGNC Symbol;Acc:HGNC:2431]	AFFY_PRIMEVIEW
903	11722174_A_AT	903.1	ENSG00000101019	UQCC1	ubiquinol-cytochrome c reductase complex assembly factor 1 [Source:HGNC Symbol;Acc:HGNC:15891]	AFFY_PRIMEVIEW
904	11722175_A_AT	904.1	ENSG00000189091	SF3B3	splicing factor 3b subunit 3 [Source:HGNC Symbol;Acc:HGNC:10770]	AFFY_PRIMEVIEW
905	11722176_A_AT	905.1	ENSG00000189091	SF3B3	splicing factor 3b subunit 3 [Source:HGNC Symbol;Acc:HGNC:10770]	AFFY_PRIMEVIEW
906	11722177_A_AT	906.1	ENSG00000140400	MAN2C1	mannosidase alpha class 2C member 1 [Source:HGNC Symbol;Acc:HGNC:6827]	AFFY_PRIMEVIEW
907	11722187_A_AT	907.1	ENSG00000142208	AKT1	AKT serine/threonine kinase 1 [Source:HGNC Symbol;Acc:HGNC:391]	AFFY_PRIMEVIEW
908	11722189_AT	908.1	ENSG00000147649	MTDH	metadherin [Source:HGNC Symbol;Acc:HGNC:29608]	AFFY_PRIMEVIEW
909	11722199_AT	909.1	ENSG00000148848	ADAM12	ADAM metallopeptidase domain 12 [Source:HGNC Symbol;Acc:HGNC:190]	AFFY_PRIMEVIEW
910	11722200_S_AT	910.1	ENSG00000148848	ADAM12	ADAM metallopeptidase domain 12 [Source:HGNC Symbol;Acc:HGNC:190]	AFFY_PRIMEVIEW
911	11722201_X_AT	911.1	ENSG00000242372	EIF6	eukaryotic translation initiation factor 6 [Source:HGNC Symbol;Acc:HGNC:6159]	AFFY_PRIMEVIEW
912	11722213_AT	912.1	ENSG00000107833	NPM3	nucleophosmin/nucleoplasmin 3 [Source:HGNC Symbol;Acc:HGNC:7931]	AFFY_PRIMEVIEW
913	11722214_A_AT	913.1	ENSG00000213339	QTRT1	queuine tRNA-ribosyltransferase catalytic subunit 1 [Source:HGNC Symbol;Acc:HGNC:23797]	AFFY_PRIMEVIEW
914	11722240_A_AT	914.1	ENSG00000151748	SAV1	salvador family WW domain containing protein 1 [Source:HGNC Symbol;Acc:HGNC:17795]	AFFY_PRIMEVIEW
915	11722248_A_AT	915.1	ENSG00000068028	RASSF1	Ras association domain family member 1 [Source:HGNC Symbol;Acc:HGNC:9882]	AFFY_PRIMEVIEW
916	11722249_S_AT	916.1	ENSG00000148655	LRMDA	leucine rich melanocyte differentiation associated [Source:HGNC Symbol;Acc:HGNC:23405]	AFFY_PRIMEVIEW
917	11722257_X_AT	917.1	ENSG00000141295	SCRN2	secernin 2 [Source:HGNC Symbol;Acc:HGNC:30381]	AFFY_PRIMEVIEW
918	11722271_AT	918.1	ENSG00000170903	MSANTD4	Myb/SANT DNA binding domain containing 4 with coiled-coils [Source:HGNC Symbol;Acc:HGNC:29383]	AFFY_PRIMEVIEW
919	11722290_A_AT	919.1	ENSG00000169155	ZBTB43	zinc finger and BTB domain containing 43 [Source:HGNC Symbol;Acc:HGNC:17908]	AFFY_PRIMEVIEW
920	11722297_S_AT	920.1	ENSG00000173621	LRFN4	leucine rich repeat and fibronectin type III domain containing 4 [Source:HGNC Symbol;Acc:HGNC:28456]	AFFY_PRIMEVIEW
921	11722301_A_AT	921.1	ENSG00000134954	ETS1	ETS proto-oncogene 1, transcription factor [Source:HGNC Symbol;Acc:HGNC:3488]	AFFY_PRIMEVIEW
922	11722312_A_AT	922.1	ENSG00000066405	CLDN18	claudin 18 [Source:HGNC Symbol;Acc:HGNC:2039]	AFFY_PRIMEVIEW
923	11722319_A_AT	923.1	ENSG00000108947	EFNB3	ephrin B3 [Source:HGNC Symbol;Acc:HGNC:3228]	AFFY_PRIMEVIEW
924	11722355_S_AT	924.1	ENSG00000153071	DAB2	DAB2, clathrin adaptor protein [Source:HGNC Symbol;Acc:HGNC:2662]	AFFY_PRIMEVIEW
925	11722362_X_AT	925.1	ENSG00000139636	LMBR1L	limb development membrane protein 1 like [Source:HGNC Symbol;Acc:HGNC:18268]	AFFY_PRIMEVIEW
926	11722363_A_AT	926.1	ENSG00000139636	LMBR1L	limb development membrane protein 1 like [Source:HGNC Symbol;Acc:HGNC:18268]	AFFY_PRIMEVIEW
927	11722374_A_AT	927.1	ENSG00000103365	GGA2	golgi associated, gamma adaptin ear containing, ARF binding protein 2 [Source:HGNC Symbol;Acc:HGNC:16064]	AFFY_PRIMEVIEW
928	11722380_AT	928.1	ENSG00000270800	RPS10-NUDT3	RPS10-NUDT3 readthrough [Source:HGNC Symbol;Acc:HGNC:49181]	AFFY_PRIMEVIEW
928	11722380_AT	928.2	ENSG00000272325	NUDT3	nudix hydrolase 3 [Source:HGNC Symbol;Acc:HGNC:8050]	AFFY_PRIMEVIEW
929	11722382_A_AT	929.1	ENSG00000140830	TXNL4B	thioredoxin like 4B [Source:HGNC Symbol;Acc:HGNC:26041]	AFFY_PRIMEVIEW
930	11722384_S_AT	930.1	ENSG00000275107	MIR6782	microRNA 6782 [Source:HGNC Symbol;Acc:HGNC:50270]	AFFY_PRIMEVIEW
930	11722384_S_AT	930.2	ENSG00000108312	UBTF	upstream binding transcription factor [Source:HGNC Symbol;Acc:HGNC:12511]	AFFY_PRIMEVIEW
931	11722386_AT	931.1	ENSG00000167470	MIDN	midnolin [Source:HGNC Symbol;Acc:HGNC:16298]	AFFY_PRIMEVIEW
932	11722394_A_AT	932.1	ENSG00000178467	P4HTM	prolyl 4-hydroxylase, transmembrane [Source:HGNC Symbol;Acc:HGNC:28858]	AFFY_PRIMEVIEW
933	11722415_A_AT	933.1	ENSG00000112339	HBS1L	HBS1 like translational GTPase [Source:HGNC Symbol;Acc:HGNC:4834]	AFFY_PRIMEVIEW
934	11722418_AT	934.1	ENSG00000132467	UTP3	UTP3, small subunit processome component [Source:HGNC Symbol;Acc:HGNC:24477]	AFFY_PRIMEVIEW
935	11722440_A_AT	935.1	ENSG00000135622	SEMA4F	ssemaphorin 4F [Source:HGNC Symbol;Acc:HGNC:10734]	AFFY_PRIMEVIEW
936	11722441_A_AT	936.1	ENSG00000135622	SEMA4F	ssemaphorin 4F [Source:HGNC Symbol;Acc:HGNC:10734]	AFFY_PRIMEVIEW
937	11722442_A_AT	937.1	ENSG00000143228	NUF2	NUF2, NDC80 kinetochore complex component [Source:HGNC Symbol;Acc:HGNC:14621]	AFFY_PRIMEVIEW
938	11722445_A_AT	938.1	ENSG00000181029	TRAPPC5	trafficking protein particle complex 5 [Source:HGNC Symbol;Acc:HGNC:23067]	AFFY_PRIMEVIEW
938	11722445_A_AT	938.2	ENSG00000269711	AC008763.3	N/A	AFFY_PRIMEVIEW
939	11722449_X_AT	939.1	ENSG00000284194	SCO2	SCO2, cytochrome c oxidase assembly protein [Source:NCBI gene;Acc:9997]	AFFY_PRIMEVIEW
939	11722449_X_AT	939.2	ENSG00000025708	TYMP	thymidine phosphorylase [Source:HGNC Symbol;Acc:HGNC:3148]	AFFY_PRIMEVIEW
940	11722464_A_AT	940.1	ENSG00000141219	C17ORF80	chromosome 17 open reading frame 80 [Source:HGNC Symbol;Acc:HGNC:29601]	AFFY_PRIMEVIEW
941	11722467_S_AT	941.1	ENSG00000007372	PAX6	paired box 6 [Source:HGNC Symbol;Acc:HGNC:8620]	AFFY_PRIMEVIEW
942	11722469_A_AT	942.1	ENSG00000164398	ACSL6	acyl-CoA synthetase long chain family member 6 [Source:HGNC Symbol;Acc:HGNC:16496]	AFFY_PRIMEVIEW
943	11722470_X_AT	943.1	ENSG00000164398	ACSL6	acyl-CoA synthetase long chain family member 6 [Source:HGNC Symbol;Acc:HGNC:16496]	AFFY_PRIMEVIEW
944	11722474_A_AT	944.1	ENSG00000145214	DGKQ	diacylglycerol kinase theta [Source:HGNC Symbol;Acc:HGNC:2856]	AFFY_PRIMEVIEW
945	11722484_A_AT	945.1	ENSG00000213563	C8ORF82	chromosome 8 open reading frame 82 [Source:HGNC Symbol;Acc:HGNC:33826]	AFFY_PRIMEVIEW
946	11722494_S_AT	946.1	ENSG00000130787	HIP1R	huntingtin interacting protein 1 related [Source:HGNC Symbol;Acc:HGNC:18415]	AFFY_PRIMEVIEW
947	11722502_A_AT	947.1	ENSG00000137843	PAK6	p21 (RAC1) activated kinase 6 [Source:HGNC Symbol;Acc:HGNC:16061]	AFFY_PRIMEVIEW
948	11722506_A_AT	948.1	ENSG00000105520	PLPPR2	phospholipid phosphatase related 2 [Source:HGNC Symbol;Acc:HGNC:29566]	AFFY_PRIMEVIEW
949	11722518_A_AT	949.1	ENSG00000198887	SMC5	structural maintenance of chromosomes 5 [Source:HGNC Symbol;Acc:HGNC:20465]	AFFY_PRIMEVIEW
950	11722519_AT	950.1	ENSG00000156510	HKDC1	hexokinase domain containing 1 [Source:HGNC Symbol;Acc:HGNC:23302]	AFFY_PRIMEVIEW
951	11722544_A_AT	951.1	ENSG00000064655	EYA2	EYA transcriptional coactivator and phosphatase 2 [Source:HGNC Symbol;Acc:HGNC:3520]	AFFY_PRIMEVIEW
952	11722553_A_AT	952.1	ENSG00000108559	NUP88	nucleoporin 88 [Source:HGNC Symbol;Acc:HGNC:8067]	AFFY_PRIMEVIEW
953	11722561_A_AT	953.1	ENSG00000135446	CDK4	cyclin dependent kinase 4 [Source:HGNC Symbol;Acc:HGNC:1773]	AFFY_PRIMEVIEW
954	11722562_S_AT	954.1	ENSG00000135446	CDK4	cyclin dependent kinase 4 [Source:HGNC Symbol;Acc:HGNC:1773]	AFFY_PRIMEVIEW
954	11722562_S_AT	954.2	ENSG00000283621	MIR6759	microRNA 6759 [Source:HGNC Symbol;Acc:HGNC:50063]	AFFY_PRIMEVIEW
955	11722577_A_AT	955.1	ENSG00000117385	P3H1	prolyl 3-hydroxylase 1 [Source:HGNC Symbol;Acc:HGNC:19316]	AFFY_PRIMEVIEW
956	11722583_A_AT	956.1	ENSG00000115457	IGFBP2	insulin like growth factor binding protein 2 [Source:HGNC Symbol;Acc:HGNC:5471]	AFFY_PRIMEVIEW
957	11722610_A_AT	957.1	ENSG00000197622	CDC42SE1	CDC42 small effector 1 [Source:HGNC Symbol;Acc:HGNC:17719]	AFFY_PRIMEVIEW
958	11722612_X_AT	958.1	ENSG00000275835	TUBGCP5	tubulin gamma complex associated protein 5 [Source:HGNC Symbol;Acc:HGNC:18600]	AFFY_PRIMEVIEW
959	11722617_AT	959.1	ENSG00000183421	RIPK4	receptor interacting serine/threonine kinase 4 [Source:HGNC Symbol;Acc:HGNC:496]	AFFY_PRIMEVIEW
960	11722623_AT	960.1	ENSG00000129925	TMEM8A	transmembrane protein 8A [Source:HGNC Symbol;Acc:HGNC:17205]	AFFY_PRIMEVIEW
961	11722628_AT	961.1	ENSG00000136051	WASHC4	WASH complex subunit 4 [Source:HGNC Symbol;Acc:HGNC:29174]	AFFY_PRIMEVIEW
962	11722630_A_AT	962.1	ENSG00000128915	ICE2	interactor of little elongation complex ELL subunit 2 [Source:HGNC Symbol;Acc:HGNC:29885]	AFFY_PRIMEVIEW
963	11722633_A_AT	963.1	ENSG00000128915	ICE2	interactor of little elongation complex ELL subunit 2 [Source:HGNC Symbol;Acc:HGNC:29885]	AFFY_PRIMEVIEW
964	11722642_A_AT	964.1	ENSG00000062282	DGAT2	diacylglycerol O-acyltransferase 2 [Source:HGNC Symbol;Acc:HGNC:16940]	AFFY_PRIMEVIEW
965	11722648_A_AT	965.1	ENSG00000129991	TNNI3	troponin I3, cardiac type [Source:HGNC Symbol;Acc:HGNC:11947]	AFFY_PRIMEVIEW
966	11722657_X_AT	966.1	ENSG00000172062	SMN1	survival of motor neuron 1, telomeric [Source:HGNC Symbol;Acc:HGNC:11117]	AFFY_PRIMEVIEW
966	11722657_X_AT	966.2	ENSG00000205571	SMN2	survival of motor neuron 2, centromeric [Source:HGNC Symbol;Acc:HGNC:11118]	AFFY_PRIMEVIEW
967	11722658_AT	967.1	ENSG00000189377	CXCL17	C-X-C motif chemokine ligand 17 [Source:HGNC Symbol;Acc:HGNC:19232]	AFFY_PRIMEVIEW
968	11722663_A_AT	968.1	ENSG00000166206	GABRB3	gamma-aminobutyric acid type A receptor beta3 subunit [Source:HGNC Symbol;Acc:HGNC:4083]	AFFY_PRIMEVIEW
969	11722668_AT	969.1	ENSG00000126461	SCAF1	SR-related CTD associated factor 1 [Source:HGNC Symbol;Acc:HGNC:30403]	AFFY_PRIMEVIEW
970	11722670_AT	970.1	ENSG00000006453	BAIAP2L1	BAI1 associated protein 2 like 1 [Source:HGNC Symbol;Acc:HGNC:21649]	AFFY_PRIMEVIEW
971	11722672_S_AT	971.1	ENSG00000023516	AKAP11	A-kinase anchoring protein 11 [Source:HGNC Symbol;Acc:HGNC:369]	AFFY_PRIMEVIEW
972	11722683_A_AT	972.1	ENSG00000169057	MECP2	methyl-CpG binding protein 2 [Source:HGNC Symbol;Acc:HGNC:6990]	AFFY_PRIMEVIEW
973	11722711_A_AT	973.1	ENSG00000143224	PPOX	protoporphyrinogen oxidase [Source:HGNC Symbol;Acc:HGNC:9280]	AFFY_PRIMEVIEW
974	11722718_A_AT	974.1	ENSG00000175866	BAIAP2	BAI1 associated protein 2 [Source:HGNC Symbol;Acc:HGNC:947]	AFFY_PRIMEVIEW
975	11722724_A_AT	975.1	ENSG00000100368	CSF2RB	colony stimulating factor 2 receptor beta common subunit [Source:HGNC Symbol;Acc:HGNC:2436]	AFFY_PRIMEVIEW
976	11722727_S_AT	976.1	ENSG00000187607	ZNF286A	zinc finger protein 286A [Source:HGNC Symbol;Acc:HGNC:13501]	AFFY_PRIMEVIEW
976	11722727_S_AT	976.2	ENSG00000249459	ZNF286B	zinc finger protein 286B [Source:HGNC Symbol;Acc:HGNC:33241]	AFFY_PRIMEVIEW
977	11722731_A_AT	977.1	ENSG00000157500	APPL1	adaptor protein, phosphotyrosine interacting with PH domain and leucine zipper 1 [Source:HGNC Symbol;Acc:HGNC:24035]	AFFY_PRIMEVIEW
978	11722733_X_AT	978.1	ENSG00000157500	APPL1	adaptor protein, phosphotyrosine interacting with PH domain and leucine zipper 1 [Source:HGNC Symbol;Acc:HGNC:24035]	AFFY_PRIMEVIEW
979	11722738_X_AT	979.1	ENSG00000112144	ICK	intestinal cell kinase [Source:HGNC Symbol;Acc:HGNC:21219]	AFFY_PRIMEVIEW
980	11722743_A_AT	980.1	ENSG00000065717	TLE2	transducin like enhancer of split 2 [Source:HGNC Symbol;Acc:HGNC:11838]	AFFY_PRIMEVIEW
981	11722744_A_AT	981.1	ENSG00000254901	BORCS8	BLOC-1 related complex subunit 8 [Source:HGNC Symbol;Acc:HGNC:37247]	AFFY_PRIMEVIEW
982	11722749_AT	982.1	ENSG00000168172	HOOK3	hook microtubule tethering protein 3 [Source:HGNC Symbol;Acc:HGNC:23576]	AFFY_PRIMEVIEW
983	11722751_AT	983.1	ENSG00000105127	AKAP8	A-kinase anchoring protein 8 [Source:HGNC Symbol;Acc:HGNC:378]	AFFY_PRIMEVIEW
984	11722760_A_AT	984.1	ENSG00000118200	CAMSAP2	calmodulin regulated spectrin associated protein family member 2 [Source:HGNC Symbol;Acc:HGNC:29188]	AFFY_PRIMEVIEW
985	11722763_S_AT	985.1	ENSG00000179348	GATA2	GATA binding protein 2 [Source:HGNC Symbol;Acc:HGNC:4171]	AFFY_PRIMEVIEW
986	11722771_AT	986.1	ENSG00000146005	PSD2	pleckstrin and Sec7 domain containing 2 [Source:HGNC Symbol;Acc:HGNC:19092]	AFFY_PRIMEVIEW
987	11722773_A_AT	987.1	ENSG00000142528	ZNF473	zinc finger protein 473 [Source:HGNC Symbol;Acc:HGNC:23239]	AFFY_PRIMEVIEW
988	11722784_AT	988.1	ENSG00000105447	GRWD1	glutamate rich WD repeat containing 1 [Source:HGNC Symbol;Acc:HGNC:21270]	AFFY_PRIMEVIEW
989	11722785_X_AT	989.1	ENSG00000105447	GRWD1	glutamate rich WD repeat containing 1 [Source:HGNC Symbol;Acc:HGNC:21270]	AFFY_PRIMEVIEW
990	11722787_A_AT	990.1	ENSG00000067225	PKM	pyruvate kinase M1/2 [Source:HGNC Symbol;Acc:HGNC:9021]	AFFY_PRIMEVIEW
991	11722790_S_AT	991.1	ENSG00000144566	RAB5A	RAB5A, member RAS oncogene family [Source:HGNC Symbol;Acc:HGNC:9783]	AFFY_PRIMEVIEW
992	11722817_A_AT	992.1	ENSG00000166526	ZNF3	zinc finger protein 3 [Source:HGNC Symbol;Acc:HGNC:13089]	AFFY_PRIMEVIEW
993	11722819_A_AT	993.1	ENSG00000131067	GGT7	gamma-glutamyltransferase 7 [Source:HGNC Symbol;Acc:HGNC:4259]	AFFY_PRIMEVIEW
994	11722826_A_AT	994.1	ENSG00000109805	NCAPG	non-SMC condensin I complex subunit G [Source:HGNC Symbol;Acc:HGNC:24304]	AFFY_PRIMEVIEW
995	11722833_A_AT	995.1	ENSG00000108100	CCNY	cyclin Y [Source:HGNC Symbol;Acc:HGNC:23354]	AFFY_PRIMEVIEW
996	11722838_A_AT	996.1	ENSG00000094755	GABRP	gamma-aminobutyric acid type A receptor pi subunit [Source:HGNC Symbol;Acc:HGNC:4089]	AFFY_PRIMEVIEW
997	11722839_AT	997.1	ENSG00000145220	LYAR	Ly1 antibody reactive [Source:HGNC Symbol;Acc:HGNC:26021]	AFFY_PRIMEVIEW
998	11722840_S_AT	998.1	ENSG00000145220	LYAR	Ly1 antibody reactive [Source:HGNC Symbol;Acc:HGNC:26021]	AFFY_PRIMEVIEW
999	11722844_A_AT	999.1	ENSG00000154380	ENAH	ENAH, actin regulator [Source:HGNC Symbol;Acc:HGNC:18271]	AFFY_PRIMEVIEW
1000	11722860_A_AT	1000.1	ENSG00000109654	TRIM2	tripartite motif containing 2 [Source:HGNC Symbol;Acc:HGNC:15974]	AFFY_PRIMEVIEW
1001	11722876_AT	1001.1	ENSG00000198844	ARHGEF15	Rho guanine nucleotide exchange factor 15 [Source:HGNC Symbol;Acc:HGNC:15590]	AFFY_PRIMEVIEW
1002	11722892_X_AT	1002.1	ENSG00000104888	SLC17A7	solute carrier family 17 member 7 [Source:HGNC Symbol;Acc:HGNC:16704]	AFFY_PRIMEVIEW
1003	11722912_AT	1003.1	ENSG00000058056	USP13	ubiquitin specific peptidase 13 [Source:HGNC Symbol;Acc:HGNC:12611]	AFFY_PRIMEVIEW
1004	11722917_S_AT	1004.1	ENSG00000235008	AL023775.1	N/A	AFFY_PRIMEVIEW
1004	11722917_S_AT	1004.2	ENSG00000136231	IGF2BP3	insulin like growth factor 2 mRNA binding protein 3 [Source:HGNC Symbol;Acc:HGNC:28868]	AFFY_PRIMEVIEW
1004	11722917_S_AT	1004.3	ENSG00000213067	AC092447.1	N/A	AFFY_PRIMEVIEW
1005	11722930_X_AT	1005.1	ENSG00000159131	GART	phosphoribosylglycinamide formyltransferase, phosphoribosylglycinamide synthetase, phosphoribosylaminoimidazole synthetase [Source:HGNC Symbol;Acc:HGNC:4163]	AFFY_PRIMEVIEW
1006	11722933_AT	1006.1	ENSG00000203668	CHML	CHM like, Rab escort protein 2 [Source:HGNC Symbol;Acc:HGNC:1941]	AFFY_PRIMEVIEW
1007	11722935_X_AT	1007.1	ENSG00000203668	CHML	CHM like, Rab escort protein 2 [Source:HGNC Symbol;Acc:HGNC:1941]	AFFY_PRIMEVIEW
1008	11722939_A_AT	1008.1	ENSG00000160447	PKN3	protein kinase N3 [Source:HGNC Symbol;Acc:HGNC:17999]	AFFY_PRIMEVIEW
1009	11722944_AT	1009.1	ENSG00000083093	PALB2	partner and localizer of BRCA2 [Source:HGNC Symbol;Acc:HGNC:26144]	AFFY_PRIMEVIEW
1010	11722952_A_AT	1010.1	ENSG00000130304	SLC27A1	solute carrier family 27 member 1 [Source:HGNC Symbol;Acc:HGNC:10995]	AFFY_PRIMEVIEW
1011	11722959_A_AT	1011.1	ENSG00000163995	ABLIM2	actin binding LIM protein family member 2 [Source:HGNC Symbol;Acc:HGNC:19195]	AFFY_PRIMEVIEW
1012	11722968_A_AT	1012.1	ENSG00000111199	TRPV4	transient receptor potential cation channel subfamily V member 4 [Source:HGNC Symbol;Acc:HGNC:18083]	AFFY_PRIMEVIEW
1013	11722971_A_AT	1013.1	ENSG00000146592	CREB5	cAMP responsive element binding protein 5 [Source:HGNC Symbol;Acc:HGNC:16844]	AFFY_PRIMEVIEW
1014	11722977_AT	1014.1	ENSG00000120075	HOXB5	homeobox B5 [Source:HGNC Symbol;Acc:HGNC:5116]	AFFY_PRIMEVIEW
1015	11722986_A_AT	1015.1	ENSG00000185019	UBOX5	U-box domain containing 5 [Source:HGNC Symbol;Acc:HGNC:17777]	AFFY_PRIMEVIEW
1016	11723006_A_AT	1016.1	ENSG00000196154	S100A4	S100 calcium binding protein A4 [Source:HGNC Symbol;Acc:HGNC:10494]	AFFY_PRIMEVIEW
1017	11723010_A_AT	1017.1	ENSG00000112984	KIF20A	kinesin family member 20A [Source:HGNC Symbol;Acc:HGNC:9787]	AFFY_PRIMEVIEW
1018	11723019_AT	1018.1	ENSG00000099994	SUSD2	sushi domain containing 2 [Source:HGNC Symbol;Acc:HGNC:30667]	AFFY_PRIMEVIEW
1019	11723067_S_AT	1019.1	ENSG00000172661	WASHC2C	WASH complex subunit 2C [Source:HGNC Symbol;Acc:HGNC:23414]	AFFY_PRIMEVIEW
1019	11723067_S_AT	1019.2	ENSG00000099290	WASHC2A	WASH complex subunit 2A [Source:HGNC Symbol;Acc:HGNC:23416]	AFFY_PRIMEVIEW
1020	11723068_AT	1020.1	ENSG00000145708	CRHBP	corticotropin releasing hormone binding protein [Source:HGNC Symbol;Acc:HGNC:2356]	AFFY_PRIMEVIEW
1021	11723077_AT	1021.1	ENSG00000102390	PBDC1	polysaccharide biosynthesis domain containing 1 [Source:HGNC Symbol;Acc:HGNC:28790]	AFFY_PRIMEVIEW
1022	11723079_AT	1022.1	ENSG00000178074	C2ORF69	chromosome 2 open reading frame 69 [Source:HGNC Symbol;Acc:HGNC:26799]	AFFY_PRIMEVIEW
1022	11723079_AT	1022.2	ENSG00000162972	MAIP1	matrix AAA peptidase interacting protein 1 [Source:HGNC Symbol;Acc:HGNC:26198]	AFFY_PRIMEVIEW
1023	11723082_S_AT	1023.1	ENSG00000114735	HEMK1	HemK methyltransferase family member 1 [Source:HGNC Symbol;Acc:HGNC:24923]	AFFY_PRIMEVIEW
1024	11723093_A_AT	1024.1	ENSG00000083799	CYLD	CYLD lysine 63 deubiquitinase [Source:HGNC Symbol;Acc:HGNC:2584]	AFFY_PRIMEVIEW
1025	11723118_A_AT	1025.1	ENSG00000133059	DSTYK	dual serine/threonine and tyrosine protein kinase [Source:HGNC Symbol;Acc:HGNC:29043]	AFFY_PRIMEVIEW
1026	11723138_AT	1026.1	ENSG00000104356	POP1	POP1 homolog, ribonuclease P/MRP subunit [Source:HGNC Symbol;Acc:HGNC:30129]	AFFY_PRIMEVIEW
1027	11723139_AT	1027.1	ENSG00000104356	POP1	POP1 homolog, ribonuclease P/MRP subunit [Source:HGNC Symbol;Acc:HGNC:30129]	AFFY_PRIMEVIEW
1028	11723143_AT	1028.1	ENSG00000102452	NALCN	sodium leak channel, non-selective [Source:HGNC Symbol;Acc:HGNC:19082]	AFFY_PRIMEVIEW
1029	11723145_A_AT	1029.1	ENSG00000204764	RANBP17	RAN binding protein 17 [Source:HGNC Symbol;Acc:HGNC:14428]	AFFY_PRIMEVIEW
1030	11723148_A_AT	1030.1	ENSG00000117479	SLC19A2	solute carrier family 19 member 2 [Source:HGNC Symbol;Acc:HGNC:10938]	AFFY_PRIMEVIEW
1031	11723152_A_AT	1031.1	ENSG00000116580	GON4L	gon-4 like [Source:HGNC Symbol;Acc:HGNC:25973]	AFFY_PRIMEVIEW
1032	11723153_A_AT	1032.1	ENSG00000116580	GON4L	gon-4 like [Source:HGNC Symbol;Acc:HGNC:25973]	AFFY_PRIMEVIEW
1032	11723153_A_AT	1032.2	ENSG00000246203	AL353807.3	N/A	AFFY_PRIMEVIEW
1033	11723154_S_AT	1033.1	ENSG00000171735	CAMTA1	calmodulin binding transcription activator 1 [Source:HGNC Symbol;Acc:HGNC:18806]	AFFY_PRIMEVIEW
1034	11723155_AT	1034.1	ENSG00000171735	CAMTA1	calmodulin binding transcription activator 1 [Source:HGNC Symbol;Acc:HGNC:18806]	AFFY_PRIMEVIEW
1035	11723169_S_AT	1035.1	ENSG00000170802	FOXN2	forkhead box N2 [Source:HGNC Symbol;Acc:HGNC:5281]	AFFY_PRIMEVIEW
1036	11723173_AT	1036.1	ENSG00000144730	IL17RD	interleukin 17 receptor D [Source:HGNC Symbol;Acc:HGNC:17616]	AFFY_PRIMEVIEW
1037	11723178_S_AT	1037.1	ENSG00000139370	SLC15A4	solute carrier family 15 member 4 [Source:HGNC Symbol;Acc:HGNC:23090]	AFFY_PRIMEVIEW
1038	11723182_AT	1038.1	ENSG00000138767	CNOT6L	CCR4-NOT transcription complex subunit 6 like [Source:HGNC Symbol;Acc:HGNC:18042]	AFFY_PRIMEVIEW
1039	11723218_S_AT	1039.1	ENSG00000198522	GPN1	GPN-loop GTPase 1 [Source:HGNC Symbol;Acc:HGNC:17030]	AFFY_PRIMEVIEW
1040	11723220_AT	1040.1	ENSG00000121351	IAPP	islet amyloid polypeptide [Source:HGNC Symbol;Acc:HGNC:5329]	AFFY_PRIMEVIEW
1041	11723285_A_AT	1041.1	ENSG00000198542	ITGBL1	integrin subunit beta like 1 [Source:HGNC Symbol;Acc:HGNC:6164]	AFFY_PRIMEVIEW
1042	11723308_S_AT	1042.1	ENSG00000213079	SCAF8	SR-related CTD associated factor 8 [Source:HGNC Symbol;Acc:HGNC:20959]	AFFY_PRIMEVIEW
1043	11723315_A_AT	1043.1	ENSG00000092529	CAPN3	calpain 3 [Source:HGNC Symbol;Acc:HGNC:1480]	AFFY_PRIMEVIEW
1043	11723315_A_AT	1043.2	ENSG00000258461	AC012651.1	N/A	AFFY_PRIMEVIEW
1044	11723317_AT	1044.1	ENSG00000084444	FAM234B	family with sequence similarity 234 member B [Source:HGNC Symbol;Acc:HGNC:29288]	AFFY_PRIMEVIEW
1045	11723323_AT	1045.1	ENSG00000042088	TDP1	tyrosyl-DNA phosphodiesterase 1 [Source:HGNC Symbol;Acc:HGNC:18884]	AFFY_PRIMEVIEW
1046	11723326_AT	1046.1	ENSG00000107159	CA9	carbonic anhydrase 9 [Source:HGNC Symbol;Acc:HGNC:1383]	AFFY_PRIMEVIEW
1047	11723327_X_AT	1047.1	ENSG00000107159	CA9	carbonic anhydrase 9 [Source:HGNC Symbol;Acc:HGNC:1383]	AFFY_PRIMEVIEW
1048	11723328_A_AT	1048.1	ENSG00000187024	PTRH1	peptidyl-tRNA hydrolase 1 homolog [Source:HGNC Symbol;Acc:HGNC:27039]	AFFY_PRIMEVIEW
1049	11723343_AT	1049.1	ENSG00000104228	TRIM35	tripartite motif containing 35 [Source:HGNC Symbol;Acc:HGNC:16285]	AFFY_PRIMEVIEW
1050	11723344_AT	1050.1	ENSG00000104228	TRIM35	tripartite motif containing 35 [Source:HGNC Symbol;Acc:HGNC:16285]	AFFY_PRIMEVIEW
1051	11723350_A_AT	1051.1	ENSG00000167972	ABCA3	ATP binding cassette subfamily A member 3 [Source:HGNC Symbol;Acc:HGNC:33]	AFFY_PRIMEVIEW
1052	11723373_A_AT	1052.1	ENSG00000146904	EPHA1	EPH receptor A1 [Source:HGNC Symbol;Acc:HGNC:3385]	AFFY_PRIMEVIEW
1053	11723380_A_AT	1053.1	ENSG00000099814	CEP170B	centrosomal protein 170B [Source:HGNC Symbol;Acc:HGNC:20362]	AFFY_PRIMEVIEW
1054	11723388_A_AT	1054.1	ENSG00000170370	EMX2	empty spiracles homeobox 2 [Source:HGNC Symbol;Acc:HGNC:3341]	AFFY_PRIMEVIEW
1055	11723392_A_AT	1055.1	ENSG00000136383	ALPK3	alpha kinase 3 [Source:HGNC Symbol;Acc:HGNC:17574]	AFFY_PRIMEVIEW
1056	11723399_AT	1056.1	ENSG00000198796	ALPK2	alpha kinase 2 [Source:HGNC Symbol;Acc:HGNC:20565]	AFFY_PRIMEVIEW
1057	11723413_AT	1057.1	ENSG00000148795	CYP17A1	cytochrome P450 family 17 subfamily A member 1 [Source:HGNC Symbol;Acc:HGNC:2593]	AFFY_PRIMEVIEW
1058	11723417_S_AT	1058.1	ENSG00000183199	HSP90AB3P	heat shock protein 90 alpha family class B member 3, pseudogene [Source:HGNC Symbol;Acc:HGNC:5259]	AFFY_PRIMEVIEW
1058	11723417_S_AT	1058.2	ENSG00000096384	HSP90AB1	heat shock protein 90 alpha family class B member 1 [Source:HGNC Symbol;Acc:HGNC:5258]	AFFY_PRIMEVIEW
1059	11723418_A_AT	1059.1	ENSG00000163032	VSNL1	visinin like 1 [Source:HGNC Symbol;Acc:HGNC:12722]	AFFY_PRIMEVIEW
1060	11723427_A_AT	1060.1	ENSG00000087263	OGFOD1	2-oxoglutarate and iron dependent oxygenase domain containing 1 [Source:HGNC Symbol;Acc:HGNC:25585]	AFFY_PRIMEVIEW
1061	11723428_S_AT	1061.1	ENSG00000215030	RPL13P12	ribosomal protein L13 pseudogene 12 [Source:HGNC Symbol;Acc:HGNC:35701]	AFFY_PRIMEVIEW
1061	11723428_S_AT	1061.2	ENSG00000167526	RPL13	ribosomal protein L13 [Source:HGNC Symbol;Acc:HGNC:10303]	AFFY_PRIMEVIEW
1061	11723428_S_AT	1061.3	ENSG00000200084	SNORD68	small nucleolar RNA, C/D box 68 [Source:HGNC Symbol;Acc:HGNC:32729]	AFFY_PRIMEVIEW
1062	11723431_AT	1062.1	ENSG00000186660	ZFP91	ZFP91 zinc finger protein [Source:HGNC Symbol;Acc:HGNC:14983]	AFFY_PRIMEVIEW
1063	11723459_AT	1063.1	ENSG00000073536	NLE1	notchless homolog 1 [Source:HGNC Symbol;Acc:HGNC:19889]	AFFY_PRIMEVIEW
1064	11723460_A_AT	1064.1	ENSG00000073536	NLE1	notchless homolog 1 [Source:HGNC Symbol;Acc:HGNC:19889]	AFFY_PRIMEVIEW
1065	11723463_A_AT	1065.1	ENSG00000185347	TEDC1	tubulin epsilon and delta complex 1 [Source:HGNC Symbol;Acc:HGNC:20127]	AFFY_PRIMEVIEW
1066	11723472_A_AT	1066.1	ENSG00000188419	CHM	CHM, Rab escort protein 1 [Source:HGNC Symbol;Acc:HGNC:1940]	AFFY_PRIMEVIEW
1067	11723473_A_AT	1067.1	ENSG00000143353	LYPLAL1	lysophospholipase like 1 [Source:HGNC Symbol;Acc:HGNC:20440]	AFFY_PRIMEVIEW
1068	11723479_A_AT	1068.1	ENSG00000204498	NFKBIL1	NFKB inhibitor like 1 [Source:HGNC Symbol;Acc:HGNC:7800]	AFFY_PRIMEVIEW
1069	11723482_S_AT	1069.1	ENSG00000116001	TIA1	TIA1 cytotoxic granule associated RNA binding protein [Source:HGNC Symbol;Acc:HGNC:11802]	AFFY_PRIMEVIEW
1070	11723499_A_AT	1070.1	ENSG00000169174	PCSK9	proprotein convertase subtilisin/kexin type 9 [Source:HGNC Symbol;Acc:HGNC:20001]	AFFY_PRIMEVIEW
1071	11723502_AT	1071.1	ENSG00000113494	PRLR	prolactin receptor [Source:HGNC Symbol;Acc:HGNC:9446]	AFFY_PRIMEVIEW
1072	11723503_AT	1072.1	ENSG00000113494	PRLR	prolactin receptor [Source:HGNC Symbol;Acc:HGNC:9446]	AFFY_PRIMEVIEW
1073	11723505_AT	1073.1	ENSG00000180357	ZNF609	zinc finger protein 609 [Source:HGNC Symbol;Acc:HGNC:29003]	AFFY_PRIMEVIEW
1074	11723521_X_AT	1074.1	ENSG00000161642	ZNF385A	zinc finger protein 385A [Source:HGNC Symbol;Acc:HGNC:17521]	AFFY_PRIMEVIEW
1075	11723549_A_AT	1075.1	ENSG00000125351	UPF3B	UPF3B, regulator of nonsense mediated mRNA decay [Source:HGNC Symbol;Acc:HGNC:20439]	AFFY_PRIMEVIEW
1076	11723555_AT	1076.1	ENSG00000163257	DCAF16	DDB1 and CUL4 associated factor 16 [Source:HGNC Symbol;Acc:HGNC:25987]	AFFY_PRIMEVIEW
1077	11723558_S_AT	1077.1	ENSG00000123562	MORF4L2	mortality factor 4 like 2 [Source:HGNC Symbol;Acc:HGNC:16849]	AFFY_PRIMEVIEW
1078	11723586_A_AT	1078.1	ENSG00000115290	GRB14	growth factor receptor bound protein 14 [Source:HGNC Symbol;Acc:HGNC:4565]	AFFY_PRIMEVIEW
1079	11723602_A_AT	1079.1	ENSG00000278259	MYO19	myosin XIX [Source:HGNC Symbol;Acc:HGNC:26234]	AFFY_PRIMEVIEW
1080	11723613_S_AT	1080.1	ENSG00000183569	SERHL2	serine hydrolase like 2 [Source:HGNC Symbol;Acc:HGNC:29446]	AFFY_PRIMEVIEW
1080	11723613_S_AT	1080.2	ENSG00000172250	SERHL	serine hydrolase-like (pseudogene) [Source:HGNC Symbol;Acc:HGNC:14408]	AFFY_PRIMEVIEW
1081	11723614_S_AT	1081.1	ENSG00000157540	DYRK1A	dual specificity tyrosine phosphorylation regulated kinase 1A [Source:HGNC Symbol;Acc:HGNC:3091]	AFFY_PRIMEVIEW
1082	11723622_A_AT	1082.1	ENSG00000168490	PHYHIP	phytanoyl-CoA 2-hydroxylase interacting protein [Source:HGNC Symbol;Acc:HGNC:16865]	AFFY_PRIMEVIEW
1083	11723627_AT	1083.1	ENSG00000139055	ERP27	endoplasmic reticulum protein 27 [Source:HGNC Symbol;Acc:HGNC:26495]	AFFY_PRIMEVIEW
1084	11723636_AT	1084.1	ENSG00000110696	C11ORF58	chromosome 11 open reading frame 58 [Source:HGNC Symbol;Acc:HGNC:16990]	AFFY_PRIMEVIEW
1085	11723637_S_AT	1085.1	ENSG00000259137	AL109766.1	N/A	AFFY_PRIMEVIEW
1085	11723637_S_AT	1085.2	ENSG00000110696	C11ORF58	chromosome 11 open reading frame 58 [Source:HGNC Symbol;Acc:HGNC:16990]	AFFY_PRIMEVIEW
1086	11723650_A_AT	1086.1	ENSG00000144021	CIAO1	cytosolic iron-sulfur assembly component 1 [Source:HGNC Symbol;Acc:HGNC:14280]	AFFY_PRIMEVIEW
1087	11723659_A_AT	1087.1	ENSG00000120942	UBIAD1	UbiA prenyltransferase domain containing 1 [Source:HGNC Symbol;Acc:HGNC:30791]	AFFY_PRIMEVIEW
1088	11723660_X_AT	1088.1	ENSG00000120942	UBIAD1	UbiA prenyltransferase domain containing 1 [Source:HGNC Symbol;Acc:HGNC:30791]	AFFY_PRIMEVIEW
1089	11723698_A_AT	1089.1	ENSG00000111331	OAS3	2'-5'-oligoadenylate synthetase 3 [Source:HGNC Symbol;Acc:HGNC:8088]	AFFY_PRIMEVIEW
1090	11723699_S_AT	1090.1	ENSG00000111331	OAS3	2'-5'-oligoadenylate synthetase 3 [Source:HGNC Symbol;Acc:HGNC:8088]	AFFY_PRIMEVIEW
1091	11723700_AT	1091.1	ENSG00000111331	OAS3	2'-5'-oligoadenylate synthetase 3 [Source:HGNC Symbol;Acc:HGNC:8088]	AFFY_PRIMEVIEW
1092	11723714_A_AT	1092.1	ENSG00000088882	CPXM1	carboxypeptidase X, M14 family member 1 [Source:HGNC Symbol;Acc:HGNC:15771]	AFFY_PRIMEVIEW
1093	11723717_A_AT	1093.1	ENSG00000122687	MRM2	mitochondrial rRNA methyltransferase 2 [Source:HGNC Symbol;Acc:HGNC:16352]	AFFY_PRIMEVIEW
1094	11723719_AT	1094.1	ENSG00000151131	C12ORF45	chromosome 12 open reading frame 45 [Source:HGNC Symbol;Acc:HGNC:28628]	AFFY_PRIMEVIEW
1095	11723734_S_AT	1095.1	ENSG00000155100	OTUD6B	OTU domain containing 6B [Source:HGNC Symbol;Acc:HGNC:24281]	AFFY_PRIMEVIEW
1096	11723735_A_AT	1096.1	ENSG00000011275	RNF216	ring finger protein 216 [Source:HGNC Symbol;Acc:HGNC:21698]	AFFY_PRIMEVIEW
1097	11723775_A_AT	1097.1	ENSG00000213015	ZNF580	zinc finger protein 580 [Source:HGNC Symbol;Acc:HGNC:29473]	AFFY_PRIMEVIEW
1098	11723777_A_AT	1098.1	ENSG00000169925	BRD3	bromodomain containing 3 [Source:HGNC Symbol;Acc:HGNC:1104]	AFFY_PRIMEVIEW
1099	11723786_A_AT	1099.1	ENSG00000196214	ZNF766	zinc finger protein 766 [Source:HGNC Symbol;Acc:HGNC:28063]	AFFY_PRIMEVIEW
1100	11723795_A_AT	1100.1	ENSG00000174669	SLC29A2	solute carrier family 29 member 2 [Source:HGNC Symbol;Acc:HGNC:11004]	AFFY_PRIMEVIEW
1101	11723798_A_AT	1101.1	ENSG00000176102	CSTF3	cleavage stimulation factor subunit 3 [Source:HGNC Symbol;Acc:HGNC:2485]	AFFY_PRIMEVIEW
1102	11723799_X_AT	1102.1	ENSG00000176102	CSTF3	cleavage stimulation factor subunit 3 [Source:HGNC Symbol;Acc:HGNC:2485]	AFFY_PRIMEVIEW
1103	11723817_AT	1103.1	ENSG00000137962	ARHGAP29	Rho GTPase activating protein 29 [Source:HGNC Symbol;Acc:HGNC:30207]	AFFY_PRIMEVIEW
1104	11723852_A_AT	1104.1	ENSG00000119866	BCL11A	B cell CLL/lymphoma 11A [Source:HGNC Symbol;Acc:HGNC:13221]	AFFY_PRIMEVIEW
1105	11723853_A_AT	1105.1	ENSG00000119866	BCL11A	B cell CLL/lymphoma 11A [Source:HGNC Symbol;Acc:HGNC:13221]	AFFY_PRIMEVIEW
1106	11723860_A_AT	1106.1	ENSG00000105926	MPP6	membrane palmitoylated protein 6 [Source:HGNC Symbol;Acc:HGNC:18167]	AFFY_PRIMEVIEW
1107	11723862_AT	1107.1	ENSG00000157103	SLC6A1	solute carrier family 6 member 1 [Source:HGNC Symbol;Acc:HGNC:11042]	AFFY_PRIMEVIEW
1108	11723887_A_AT	1108.1	ENSG00000100416	TRMU	tRNA 5-methylaminomethyl-2-thiouridylate methyltransferase [Source:HGNC Symbol;Acc:HGNC:25481]	AFFY_PRIMEVIEW
1109	11723893_S_AT	1109.1	ENSG00000005339	CREBBP	CREB binding protein [Source:HGNC Symbol;Acc:HGNC:2348]	AFFY_PRIMEVIEW
1110	11723898_A_AT	1110.1	ENSG00000171097	KYAT1	kynurenine aminotransferase 1 [Source:HGNC Symbol;Acc:HGNC:1564]	AFFY_PRIMEVIEW
1111	11723916_AT	1111.1	ENSG00000125977	EIF2S2	eukaryotic translation initiation factor 2 subunit beta [Source:HGNC Symbol;Acc:HGNC:3266]	AFFY_PRIMEVIEW
1112	11723929_A_AT	1112.1	ENSG00000197444	OGDHL	oxoglutarate dehydrogenase like [Source:HGNC Symbol;Acc:HGNC:25590]	AFFY_PRIMEVIEW
1113	11723934_A_AT	1113.1	ENSG00000183837	PNMA3	PNMA family member 3 [Source:HGNC Symbol;Acc:HGNC:18742]	AFFY_PRIMEVIEW
1114	11723935_X_AT	1114.1	ENSG00000183837	PNMA3	PNMA family member 3 [Source:HGNC Symbol;Acc:HGNC:18742]	AFFY_PRIMEVIEW
1115	11723940_AT	1115.1	ENSG00000169605	GKN1	gastrokine 1 [Source:HGNC Symbol;Acc:HGNC:23217]	AFFY_PRIMEVIEW
1116	11723951_A_AT	1116.1	ENSG00000003436	TFPI	tissue factor pathway inhibitor [Source:HGNC Symbol;Acc:HGNC:11760]	AFFY_PRIMEVIEW
1117	11723957_X_AT	1117.1	ENSG00000106355	LSM5	LSM5 homolog, U6 small nuclear RNA and mRNA degradation associated [Source:HGNC Symbol;Acc:HGNC:17162]	AFFY_PRIMEVIEW
1118	11723965_AT	1118.1	ENSG00000038002	AGA	aspartylglucosaminidase [Source:HGNC Symbol;Acc:HGNC:318]	AFFY_PRIMEVIEW
1119	11723971_A_AT	1119.1	ENSG00000137074	APTX	aprataxin [Source:HGNC Symbol;Acc:HGNC:15984]	AFFY_PRIMEVIEW
1120	11723993_A_AT	1120.1	ENSG00000127952	STYXL1	serine/threonine/tyrosine interacting like 1 [Source:HGNC Symbol;Acc:HGNC:18165]	AFFY_PRIMEVIEW
1121	11723994_X_AT	1121.1	ENSG00000127952	STYXL1	serine/threonine/tyrosine interacting like 1 [Source:HGNC Symbol;Acc:HGNC:18165]	AFFY_PRIMEVIEW
1122	11724000_A_AT	1122.1	ENSG00000171425	ZNF581	zinc finger protein 581 [Source:HGNC Symbol;Acc:HGNC:25017]	AFFY_PRIMEVIEW
1123	11724023_X_AT	1123.1	ENSG00000204977	TRIM13	tripartite motif containing 13 [Source:HGNC Symbol;Acc:HGNC:9976]	AFFY_PRIMEVIEW
1124	11724036_A_AT	1124.1	ENSG00000073756	PTGS2	prostaglandin-endoperoxide synthase 2 [Source:HGNC Symbol;Acc:HGNC:9605]	AFFY_PRIMEVIEW
1125	11724057_A_AT	1125.1	ENSG00000109576	AADAT	aminoadipate aminotransferase [Source:HGNC Symbol;Acc:HGNC:17929]	AFFY_PRIMEVIEW
1126	11724064_A_AT	1126.1	ENSG00000125454	SLC25A19	solute carrier family 25 member 19 [Source:HGNC Symbol;Acc:HGNC:14409]	AFFY_PRIMEVIEW
1127	11724069_AT	1127.1	ENSG00000139946	PELI2	pellino E3 ubiquitin protein ligase family member 2 [Source:HGNC Symbol;Acc:HGNC:8828]	AFFY_PRIMEVIEW
1128	11724072_A_AT	1128.1	ENSG00000132801	ZSWIM3	zinc finger SWIM-type containing 3 [Source:HGNC Symbol;Acc:HGNC:16157]	AFFY_PRIMEVIEW
1129	11724083_A_AT	1129.1	ENSG00000124787	RPP40	ribonuclease P/MRP subunit p40 [Source:HGNC Symbol;Acc:HGNC:20992]	AFFY_PRIMEVIEW
1130	11724099_AT	1130.1	ENSG00000142733	MAP3K6	mitogen-activated protein kinase kinase kinase 6 [Source:HGNC Symbol;Acc:HGNC:6858]	AFFY_PRIMEVIEW
1131	11724115_AT	1131.1	ENSG00000196700	ZNF512B	zinc finger protein 512B [Source:HGNC Symbol;Acc:HGNC:29212]	AFFY_PRIMEVIEW
1132	11724120_A_AT	1132.1	ENSG00000213186	TRIM59	tripartite motif containing 59 [Source:HGNC Symbol;Acc:HGNC:30834]	AFFY_PRIMEVIEW
1133	11724150_A_AT	1133.1	ENSG00000175854	SWI5	SWI5 homologous recombination repair protein [Source:HGNC Symbol;Acc:HGNC:31412]	AFFY_PRIMEVIEW
1134	11724151_A_AT	1134.1	ENSG00000131746	TNS4	tensin 4 [Source:HGNC Symbol;Acc:HGNC:24352]	AFFY_PRIMEVIEW
1135	11724152_A_AT	1135.1	ENSG00000131746	TNS4	tensin 4 [Source:HGNC Symbol;Acc:HGNC:24352]	AFFY_PRIMEVIEW
1136	11724156_AT	1136.1	ENSG00000109193	SULT1E1	sulfotransferase family 1E member 1 [Source:HGNC Symbol;Acc:HGNC:11377]	AFFY_PRIMEVIEW
1137	11724157_X_AT	1137.1	ENSG00000109193	SULT1E1	sulfotransferase family 1E member 1 [Source:HGNC Symbol;Acc:HGNC:11377]	AFFY_PRIMEVIEW
1138	11724160_A_AT	1138.1	ENSG00000151233	GXYLT1	glucoside xylosyltransferase 1 [Source:HGNC Symbol;Acc:HGNC:27482]	AFFY_PRIMEVIEW
1139	11724169_S_AT	1139.1	ENSG00000188801	ZNF322P1	zinc finger protein 322 pseudogene 1 [Source:HGNC Symbol;Acc:HGNC:14003]	AFFY_PRIMEVIEW
1139	11724169_S_AT	1139.2	ENSG00000181315	ZNF322	zinc finger protein 322 [Source:HGNC Symbol;Acc:HGNC:23640]	AFFY_PRIMEVIEW
1140	11724183_A_AT	1140.1	ENSG00000167654	ATCAY	ATCAY, caytaxin [Source:HGNC Symbol;Acc:HGNC:779]	AFFY_PRIMEVIEW
1141	11724201_A_AT	1141.1	ENSG00000161558	TMEM143	transmembrane protein 143 [Source:HGNC Symbol;Acc:HGNC:25603]	AFFY_PRIMEVIEW
1142	11724206_A_AT	1142.1	ENSG00000002822	MAD1L1	mitotic arrest deficient 1 like 1 [Source:HGNC Symbol;Acc:HGNC:6762]	AFFY_PRIMEVIEW
1143	11724208_A_AT	1143.1	ENSG00000132768	DPH2	DPH2 homolog [Source:HGNC Symbol;Acc:HGNC:3004]	AFFY_PRIMEVIEW
1144	11724217_A_AT	1144.1	ENSG00000092978	GPATCH2	G-patch domain containing 2 [Source:HGNC Symbol;Acc:HGNC:25499]	AFFY_PRIMEVIEW
1145	11724225_A_AT	1145.1	ENSG00000006625	GGCT	gamma-glutamylcyclotransferase [Source:HGNC Symbol;Acc:HGNC:21705]	AFFY_PRIMEVIEW
1146	11724236_A_AT	1146.1	ENSG00000104312	RIPK2	receptor interacting serine/threonine kinase 2 [Source:HGNC Symbol;Acc:HGNC:10020]	AFFY_PRIMEVIEW
1147	11724261_A_AT	1147.1	ENSG00000038382	TRIO	trio Rho guanine nucleotide exchange factor [Source:HGNC Symbol;Acc:HGNC:12303]	AFFY_PRIMEVIEW
1148	11724262_S_AT	1148.1	ENSG00000038382	TRIO	trio Rho guanine nucleotide exchange factor [Source:HGNC Symbol;Acc:HGNC:12303]	AFFY_PRIMEVIEW
1149	11724270_AT	1149.1	ENSG00000067191	CACNB1	calcium voltage-gated channel auxiliary subunit beta 1 [Source:HGNC Symbol;Acc:HGNC:1401]	AFFY_PRIMEVIEW
1150	11724275_S_AT	1150.1	ENSG00000249992	TMEM158	transmembrane protein 158 (gene/pseudogene) [Source:HGNC Symbol;Acc:HGNC:30293]	AFFY_PRIMEVIEW
1151	11724298_A_AT	1151.1	ENSG00000125485	DDX31	DEAD-box helicase 31 [Source:HGNC Symbol;Acc:HGNC:16715]	AFFY_PRIMEVIEW
1152	11724299_S_AT	1152.1	ENSG00000125485	DDX31	DEAD-box helicase 31 [Source:HGNC Symbol;Acc:HGNC:16715]	AFFY_PRIMEVIEW
1153	11724300_A_AT	1153.1	ENSG00000137955	RABGGTB	Rab geranylgeranyltransferase subunit beta [Source:HGNC Symbol;Acc:HGNC:9796]	AFFY_PRIMEVIEW
1154	11724302_A_AT	1154.1	ENSG00000102189	EEA1	early endosome antigen 1 [Source:HGNC Symbol;Acc:HGNC:3185]	AFFY_PRIMEVIEW
1155	11724328_A_AT	1155.1	ENSG00000175063	UBE2C	ubiquitin conjugating enzyme E2 C [Source:HGNC Symbol;Acc:HGNC:15937]	AFFY_PRIMEVIEW
1156	11724337_S_AT	1156.1	ENSG00000091129	NRCAM	neuronal cell adhesion molecule [Source:HGNC Symbol;Acc:HGNC:7994]	AFFY_PRIMEVIEW
1157	11724338_A_AT	1157.1	ENSG00000196376	SLC35F1	solute carrier family 35 member F1 [Source:HGNC Symbol;Acc:HGNC:21483]	AFFY_PRIMEVIEW
1158	11724359_A_AT	1158.1	ENSG00000166167	BTRC	beta-transducin repeat containing E3 ubiquitin protein ligase [Source:HGNC Symbol;Acc:HGNC:1144]	AFFY_PRIMEVIEW
1159	11724369_AT	1159.1	ENSG00000138944	SHISAL1	shisa like 1 [Source:HGNC Symbol;Acc:HGNC:29335]	AFFY_PRIMEVIEW
1160	11724376_AT	1160.1	ENSG00000076641	PAG1	phosphoprotein membrane anchor with glycosphingolipid microdomains 1 [Source:HGNC Symbol;Acc:HGNC:30043]	AFFY_PRIMEVIEW
1161	11724379_A_AT	1161.1	ENSG00000135540	NHSL1	NHS like 1 [Source:HGNC Symbol;Acc:HGNC:21021]	AFFY_PRIMEVIEW
1162	11724405_AT	1162.1	ENSG00000151364	KCTD14	potassium channel tetramerization domain containing 14 [Source:HGNC Symbol;Acc:HGNC:23295]	AFFY_PRIMEVIEW
1163	11724407_S_AT	1163.1	ENSG00000105173	CCNE1	cyclin E1 [Source:HGNC Symbol;Acc:HGNC:1589]	AFFY_PRIMEVIEW
1164	11724415_AT	1164.1	ENSG00000154309	DISP1	dispatched RND transporter family member 1 [Source:HGNC Symbol;Acc:HGNC:19711]	AFFY_PRIMEVIEW
1165	11724421_AT	1165.1	ENSG00000182580	EPHB3	EPH receptor B3 [Source:HGNC Symbol;Acc:HGNC:3394]	AFFY_PRIMEVIEW
1166	11724443_A_AT	1166.1	ENSG00000064489	BORCS8-MEF2B	BORCS8-MEF2B readthrough [Source:HGNC Symbol;Acc:HGNC:39979]	AFFY_PRIMEVIEW
1166	11724443_A_AT	1166.2	ENSG00000213999	MEF2B	myocyte enhancer factor 2B [Source:HGNC Symbol;Acc:HGNC:6995]	AFFY_PRIMEVIEW
1167	11724444_A_AT	1167.1	ENSG00000102048	ASB9	ankyrin repeat and SOCS box containing 9 [Source:HGNC Symbol;Acc:HGNC:17184]	AFFY_PRIMEVIEW
1168	11724461_A_AT	1168.1	ENSG00000109107	ALDOC	aldolase, fructose-bisphosphate C [Source:HGNC Symbol;Acc:HGNC:418]	AFFY_PRIMEVIEW
1169	11724462_X_AT	1169.1	ENSG00000109107	ALDOC	aldolase, fructose-bisphosphate C [Source:HGNC Symbol;Acc:HGNC:418]	AFFY_PRIMEVIEW
1170	11724464_A_AT	1170.1	ENSG00000011426	ANLN	anillin actin binding protein [Source:HGNC Symbol;Acc:HGNC:14082]	AFFY_PRIMEVIEW
1171	11724465_A_AT	1171.1	ENSG00000011426	ANLN	anillin actin binding protein [Source:HGNC Symbol;Acc:HGNC:14082]	AFFY_PRIMEVIEW
1172	11724472_AT	1172.1	ENSG00000175467	SART1	SART1, U4/U6.U5 tri-snRNP-associated protein 1 [Source:HGNC Symbol;Acc:HGNC:10538]	AFFY_PRIMEVIEW
1173	11724486_AT	1173.1	ENSG00000103429	BFAR	bifunctional apoptosis regulator [Source:HGNC Symbol;Acc:HGNC:17613]	AFFY_PRIMEVIEW
1174	11724487_X_AT	1174.1	ENSG00000103429	BFAR	bifunctional apoptosis regulator [Source:HGNC Symbol;Acc:HGNC:17613]	AFFY_PRIMEVIEW
1175	11724492_A_AT	1175.1	ENSG00000105486	LIG1	DNA ligase 1 [Source:HGNC Symbol;Acc:HGNC:6598]	AFFY_PRIMEVIEW
1176	11724499_AT	1176.1	ENSG00000100060	MFNG	MFNG O-fucosylpeptide 3-beta-N-acetylglucosaminyltransferase [Source:HGNC Symbol;Acc:HGNC:7038]	AFFY_PRIMEVIEW
1177	11724500_AT	1177.1	ENSG00000100122	CRYBB1	crystallin beta B1 [Source:HGNC Symbol;Acc:HGNC:2397]	AFFY_PRIMEVIEW
1178	11724520_A_AT	1178.1	ENSG00000167625	ZNF526	zinc finger protein 526 [Source:HGNC Symbol;Acc:HGNC:29415]	AFFY_PRIMEVIEW
1179	11724522_A_AT	1179.1	ENSG00000101152	DNAJC5	DnaJ heat shock protein family (Hsp40) member C5 [Source:HGNC Symbol;Acc:HGNC:16235]	AFFY_PRIMEVIEW
1180	11724542_AT	1180.1	ENSG00000151005	TKTL2	transketolase like 2 [Source:HGNC Symbol;Acc:HGNC:25313]	AFFY_PRIMEVIEW
1181	11724544_A_AT	1181.1	ENSG00000068654	POLR1A	RNA polymerase I subunit A [Source:HGNC Symbol;Acc:HGNC:17264]	AFFY_PRIMEVIEW
1182	11724578_AT	1182.1	ENSG00000198910	L1CAM	L1 cell adhesion molecule [Source:HGNC Symbol;Acc:HGNC:6470]	AFFY_PRIMEVIEW
1183	11724589_S_AT	1183.1	ENSG00000262406	MMP12	matrix metallopeptidase 12 [Source:HGNC Symbol;Acc:HGNC:7158]	AFFY_PRIMEVIEW
1184	11724590_A_AT	1184.1	ENSG00000242220	TCP10L	t-complex 10 like [Source:HGNC Symbol;Acc:HGNC:11657]	AFFY_PRIMEVIEW
1184	11724590_A_AT	1184.2	ENSG00000265590	AP000275.2	N/A	AFFY_PRIMEVIEW
1185	11724591_X_AT	1185.1	ENSG00000265590	AP000275.2	N/A	AFFY_PRIMEVIEW
1185	11724591_X_AT	1185.2	ENSG00000242220	TCP10L	t-complex 10 like [Source:HGNC Symbol;Acc:HGNC:11657]	AFFY_PRIMEVIEW
1186	11724592_AT	1186.1	ENSG00000186842	LINC00846	long intergenic non-protein coding RNA 846 [Source:HGNC Symbol;Acc:HGNC:16080]	AFFY_PRIMEVIEW
1186	11724592_AT	1186.2	ENSG00000242220	TCP10L	t-complex 10 like [Source:HGNC Symbol;Acc:HGNC:11657]	AFFY_PRIMEVIEW
1187	11724594_AT	1187.1	ENSG00000127252	HRASLS	HRAS like suppressor [Source:HGNC Symbol;Acc:HGNC:14922]	AFFY_PRIMEVIEW
1188	11724608_A_AT	1188.1	ENSG00000010361	FUZ	fuzzy planar cell polarity protein [Source:HGNC Symbol;Acc:HGNC:26219]	AFFY_PRIMEVIEW
1189	11724677_AT	1189.1	ENSG00000126814	TRMT5	tRNA methyltransferase 5 [Source:HGNC Symbol;Acc:HGNC:23141]	AFFY_PRIMEVIEW
1190	11724683_A_AT	1190.1	ENSG00000167851	CD300A	CD300a molecule [Source:HGNC Symbol;Acc:HGNC:19319]	AFFY_PRIMEVIEW
1191	11724691_AT	1191.1	ENSG00000128408	RIBC2	RIB43A domain with coiled-coils 2 [Source:HGNC Symbol;Acc:HGNC:13241]	AFFY_PRIMEVIEW
1192	11724698_AT	1192.1	ENSG00000122733	PHF24	PHD finger protein 24 [Source:HGNC Symbol;Acc:HGNC:29180]	AFFY_PRIMEVIEW
1193	11724702_A_AT	1193.1	ENSG00000135374	ELF5	E74 like ETS transcription factor 5 [Source:HGNC Symbol;Acc:HGNC:3320]	AFFY_PRIMEVIEW
1194	11724713_AT	1194.1	ENSG00000185614	INKA1	inka box actin regulator 1 [Source:HGNC Symbol;Acc:HGNC:32480]	AFFY_PRIMEVIEW
1195	11724729_A_AT	1195.1	ENSG00000153563	CD8A	CD8a molecule [Source:HGNC Symbol;Acc:HGNC:1706]	AFFY_PRIMEVIEW
1196	11724744_AT	1196.1	ENSG00000169085	VXN	vexin [Source:HGNC Symbol;Acc:HGNC:28498]	AFFY_PRIMEVIEW
1197	11724751_AT	1197.1	ENSG00000053372	MRTO4	MRT4 homolog, ribosome maturation factor [Source:HGNC Symbol;Acc:HGNC:18477]	AFFY_PRIMEVIEW
1198	11724762_A_AT	1198.1	ENSG00000155792	DEPTOR	DEP domain containing MTOR interacting protein [Source:HGNC Symbol;Acc:HGNC:22953]	AFFY_PRIMEVIEW
1199	11724768_S_AT	1199.1	ENSG00000143226	FCGR2A	Fc fragment of IgG receptor IIa [Source:HGNC Symbol;Acc:HGNC:3616]	AFFY_PRIMEVIEW
1199	11724768_S_AT	1199.2	ENSG00000244682	FCGR2C	Fc fragment of IgG receptor IIc (gene/pseudogene) [Source:HGNC Symbol;Acc:HGNC:15626]	AFFY_PRIMEVIEW
1200	11724769_X_AT	1200.1	ENSG00000244682	FCGR2C	Fc fragment of IgG receptor IIc (gene/pseudogene) [Source:HGNC Symbol;Acc:HGNC:15626]	AFFY_PRIMEVIEW
1200	11724769_X_AT	1200.2	ENSG00000143226	FCGR2A	Fc fragment of IgG receptor IIa [Source:HGNC Symbol;Acc:HGNC:3616]	AFFY_PRIMEVIEW
1201	11724774_A_AT	1201.1	ENSG00000167925	GHDC	GH3 domain containing [Source:HGNC Symbol;Acc:HGNC:24438]	AFFY_PRIMEVIEW
1202	11724776_AT	1202.1	ENSG00000165434	PGM2L1	phosphoglucomutase 2 like 1 [Source:HGNC Symbol;Acc:HGNC:20898]	AFFY_PRIMEVIEW
1203	11724777_AT	1203.1	ENSG00000165434	PGM2L1	phosphoglucomutase 2 like 1 [Source:HGNC Symbol;Acc:HGNC:20898]	AFFY_PRIMEVIEW
1204	11724789_A_AT	1204.1	ENSG00000131437	KIF3A	kinesin family member 3A [Source:HGNC Symbol;Acc:HGNC:6319]	AFFY_PRIMEVIEW
1205	11724794_A_AT	1205.1	ENSG00000087157	PGS1	phosphatidylglycerophosphate synthase 1 [Source:HGNC Symbol;Acc:HGNC:30029]	AFFY_PRIMEVIEW
1206	11724800_A_AT	1206.1	ENSG00000103485	QPRT	quinolinate phosphoribosyltransferase [Source:HGNC Symbol;Acc:HGNC:9755]	AFFY_PRIMEVIEW
1207	11724809_AT	1207.1	ENSG00000110395	CBL	Cbl proto-oncogene [Source:HGNC Symbol;Acc:HGNC:1541]	AFFY_PRIMEVIEW
1208	11724811_AT	1208.1	N/A	N/A	N/A	N/A
1209	11724821_A_AT	1209.1	ENSG00000119408	NEK6	NIMA related kinase 6 [Source:HGNC Symbol;Acc:HGNC:7749]	AFFY_PRIMEVIEW
1210	11724828_AT	1210.1	ENSG00000115009	CCL20	C-C motif chemokine ligand 20 [Source:HGNC Symbol;Acc:HGNC:10619]	AFFY_PRIMEVIEW
1211	11724831_AT	1211.1	ENSG00000101846	STS	steroid sulfatase [Source:HGNC Symbol;Acc:HGNC:11425]	AFFY_PRIMEVIEW
1212	11724835_S_AT	1212.1	ENSG00000182782	HCAR2	hydroxycarboxylic acid receptor 2 [Source:HGNC Symbol;Acc:HGNC:24827]	AFFY_PRIMEVIEW
1212	11724835_S_AT	1212.2	ENSG00000255398	HCAR3	hydroxycarboxylic acid receptor 3 [Source:HGNC Symbol;Acc:HGNC:16824]	AFFY_PRIMEVIEW
1213	11724838_A_AT	1213.1	ENSG00000144959	NCEH1	neutral cholesterol ester hydrolase 1 [Source:HGNC Symbol;Acc:HGNC:29260]	AFFY_PRIMEVIEW
1214	11724846_S_AT	1214.1	ENSG00000184162	NR2C2AP	nuclear receptor 2C2 associated protein [Source:HGNC Symbol;Acc:HGNC:30763]	AFFY_PRIMEVIEW
1215	11724876_X_AT	1215.1	ENSG00000139154	AEBP2	AE binding protein 2 [Source:HGNC Symbol;Acc:HGNC:24051]	AFFY_PRIMEVIEW
1216	11724878_S_AT	1216.1	ENSG00000139154	AEBP2	AE binding protein 2 [Source:HGNC Symbol;Acc:HGNC:24051]	AFFY_PRIMEVIEW
1217	11724881_AT	1217.1	ENSG00000171940	ZNF217	zinc finger protein 217 [Source:HGNC Symbol;Acc:HGNC:13009]	AFFY_PRIMEVIEW
1218	11724882_X_AT	1218.1	ENSG00000143367	TUFT1	tuftelin 1 [Source:HGNC Symbol;Acc:HGNC:12422]	AFFY_PRIMEVIEW
1219	11724883_A_AT	1219.1	ENSG00000140511	HAPLN3	hyaluronan and proteoglycan link protein 3 [Source:HGNC Symbol;Acc:HGNC:21446]	AFFY_PRIMEVIEW
1220	11724895_AT	1220.1	ENSG00000143614	GATAD2B	GATA zinc finger domain containing 2B [Source:HGNC Symbol;Acc:HGNC:30778]	AFFY_PRIMEVIEW
1221	11724930_A_AT	1221.1	ENSG00000135144	DTX1	deltex E3 ubiquitin ligase 1 [Source:HGNC Symbol;Acc:HGNC:3060]	AFFY_PRIMEVIEW
1222	11724934_A_AT	1222.1	ENSG00000184436	THAP7	THAP domain containing 7 [Source:HGNC Symbol;Acc:HGNC:23190]	AFFY_PRIMEVIEW
1223	11724942_X_AT	1223.1	ENSG00000008735	MAPK8IP2	mitogen-activated protein kinase 8 interacting protein 2 [Source:HGNC Symbol;Acc:HGNC:6883]	AFFY_PRIMEVIEW
1224	11724943_AT	1224.1	ENSG00000158258	CLSTN2	calsyntenin 2 [Source:HGNC Symbol;Acc:HGNC:17448]	AFFY_PRIMEVIEW
1225	11724944_AT	1225.1	ENSG00000158258	CLSTN2	calsyntenin 2 [Source:HGNC Symbol;Acc:HGNC:17448]	AFFY_PRIMEVIEW
1226	11724948_AT	1226.1	ENSG00000179862	CITED4	Cbp/p300 interacting transactivator with Glu/Asp rich carboxy-terminal domain 4 [Source:HGNC Symbol;Acc:HGNC:18696]	AFFY_PRIMEVIEW
1227	11724956_A_AT	1227.1	ENSG00000170468	RIOX1	ribosomal oxygenase 1 [Source:HGNC Symbol;Acc:HGNC:20968]	AFFY_PRIMEVIEW
1228	11724967_AT	1228.1	ENSG00000103404	USP31	ubiquitin specific peptidase 31 [Source:HGNC Symbol;Acc:HGNC:20060]	AFFY_PRIMEVIEW
1229	11724986_A_AT	1229.1	ENSG00000103021	CCDC113	coiled-coil domain containing 113 [Source:HGNC Symbol;Acc:HGNC:25002]	AFFY_PRIMEVIEW
1230	11724987_A_AT	1230.1	ENSG00000103021	CCDC113	coiled-coil domain containing 113 [Source:HGNC Symbol;Acc:HGNC:25002]	AFFY_PRIMEVIEW
1231	11724988_A_AT	1231.1	ENSG00000103021	CCDC113	coiled-coil domain containing 113 [Source:HGNC Symbol;Acc:HGNC:25002]	AFFY_PRIMEVIEW
1232	11724990_S_AT	1232.1	ENSG00000070371	CLTCL1	clathrin heavy chain like 1 [Source:HGNC Symbol;Acc:HGNC:2093]	AFFY_PRIMEVIEW
1233	11724998_A_AT	1233.1	ENSG00000114013	CD86	CD86 molecule [Source:HGNC Symbol;Acc:HGNC:1705]	AFFY_PRIMEVIEW
1234	11725000_AT	1234.1	ENSG00000140274	DUOXA2	dual oxidase maturation factor 2 [Source:HGNC Symbol;Acc:HGNC:32698]	AFFY_PRIMEVIEW
1235	11725012_A_AT	1235.1	ENSG00000115041	KCNIP3	potassium voltage-gated channel interacting protein 3 [Source:HGNC Symbol;Acc:HGNC:15523]	AFFY_PRIMEVIEW
1236	11725020_AT	1236.1	ENSG00000111713	GYS2	glycogen synthase 2 [Source:HGNC Symbol;Acc:HGNC:4707]	AFFY_PRIMEVIEW
1237	11725024_A_AT	1237.1	ENSG00000285441	SOD2	superoxide dismutase 2 [Source:NCBI gene;Acc:6648]	AFFY_PRIMEVIEW
1237	11725024_A_AT	1237.2	ENSG00000112096	SOD2	superoxide dismutase 2 [Source:HGNC Symbol;Acc:HGNC:11180]	AFFY_PRIMEVIEW
1238	11725030_S_AT	1238.1	ENSG00000100941	PNN	pinin, desmosome associated protein [Source:HGNC Symbol;Acc:HGNC:9162]	AFFY_PRIMEVIEW
1239	11725042_A_AT	1239.1	ENSG00000166913	YWHAB	tyrosine 3-monooxygenase/tryptophan 5-monooxygenase activation protein beta [Source:HGNC Symbol;Acc:HGNC:12849]	AFFY_PRIMEVIEW
1240	11725052_A_AT	1240.1	ENSG00000184428	TOP1MT	DNA topoisomerase I mitochondrial [Source:HGNC Symbol;Acc:HGNC:29787]	AFFY_PRIMEVIEW
1241	11725053_X_AT	1241.1	ENSG00000184428	TOP1MT	DNA topoisomerase I mitochondrial [Source:HGNC Symbol;Acc:HGNC:29787]	AFFY_PRIMEVIEW
1242	11725060_S_AT	1242.1	ENSG00000187555	USP7	ubiquitin specific peptidase 7 [Source:HGNC Symbol;Acc:HGNC:12630]	AFFY_PRIMEVIEW
1243	11725065_A_AT	1243.1	ENSG00000070814	TCOF1	treacle ribosome biogenesis factor 1 [Source:HGNC Symbol;Acc:HGNC:11654]	AFFY_PRIMEVIEW
1244	11725068_X_AT	1244.1	ENSG00000058404	CAMK2B	calcium/calmodulin dependent protein kinase II beta [Source:HGNC Symbol;Acc:HGNC:1461]	AFFY_PRIMEVIEW
1245	11725076_A_AT	1245.1	ENSG00000122591	FAM126A	family with sequence similarity 126 member A [Source:HGNC Symbol;Acc:HGNC:24587]	AFFY_PRIMEVIEW
1246	11725077_AT	1246.1	ENSG00000143622	RIT1	Ras like without CAAX 1 [Source:HGNC Symbol;Acc:HGNC:10023]	AFFY_PRIMEVIEW
1247	11725085_A_AT	1247.1	ENSG00000132434	LANCL2	LanC like 2 [Source:HGNC Symbol;Acc:HGNC:6509]	AFFY_PRIMEVIEW
1248	11725090_AT	1248.1	ENSG00000089123	TASP1	taspase 1 [Source:HGNC Symbol;Acc:HGNC:15859]	AFFY_PRIMEVIEW
1249	11725100_S_AT	1249.1	ENSG00000089048	ESF1	ESF1 nucleolar pre-rRNA processing protein homolog [Source:HGNC Symbol;Acc:HGNC:15898]	AFFY_PRIMEVIEW
1250	11725103_S_AT	1250.1	ENSG00000146648	EGFR	epidermal growth factor receptor [Source:HGNC Symbol;Acc:HGNC:3236]	AFFY_PRIMEVIEW
1251	11725118_A_AT	1251.1	ENSG00000165714	BORCS5	BLOC-1 related complex subunit 5 [Source:HGNC Symbol;Acc:HGNC:17950]	AFFY_PRIMEVIEW
1252	11725123_A_AT	1252.1	ENSG00000070501	POLB	DNA polymerase beta [Source:HGNC Symbol;Acc:HGNC:9174]	AFFY_PRIMEVIEW
1253	11725162_A_AT	1253.1	ENSG00000146233	CYP39A1	cytochrome P450 family 39 subfamily A member 1 [Source:HGNC Symbol;Acc:HGNC:17449]	AFFY_PRIMEVIEW
1254	11725163_X_AT	1254.1	ENSG00000146233	CYP39A1	cytochrome P450 family 39 subfamily A member 1 [Source:HGNC Symbol;Acc:HGNC:17449]	AFFY_PRIMEVIEW
1255	11725171_AT	1255.1	ENSG00000112033	PPARD	peroxisome proliferator activated receptor delta [Source:HGNC Symbol;Acc:HGNC:9235]	AFFY_PRIMEVIEW
1256	11725182_A_AT	1256.1	ENSG00000119408	NEK6	NIMA related kinase 6 [Source:HGNC Symbol;Acc:HGNC:7749]	AFFY_PRIMEVIEW
1257	11725194_A_AT	1257.1	ENSG00000130475	FCHO1	FCH domain only 1 [Source:HGNC Symbol;Acc:HGNC:29002]	AFFY_PRIMEVIEW
1258	11725198_AT	1258.1	ENSG00000115008	IL1A	interleukin 1 alpha [Source:HGNC Symbol;Acc:HGNC:5991]	AFFY_PRIMEVIEW
1259	11725217_A_AT	1259.1	ENSG00000196151	WDSUB1	WD repeat, sterile alpha motif and U-box domain containing 1 [Source:HGNC Symbol;Acc:HGNC:26697]	AFFY_PRIMEVIEW
1260	11725222_A_AT	1260.1	ENSG00000172164	SNTB1	syntrophin beta 1 [Source:HGNC Symbol;Acc:HGNC:11168]	AFFY_PRIMEVIEW
1261	11725233_AT	1261.1	ENSG00000143515	ATP8B2	ATPase phospholipid transporting 8B2 [Source:HGNC Symbol;Acc:HGNC:13534]	AFFY_PRIMEVIEW
1262	11725236_AT	1262.1	ENSG00000166860	ZBTB39	zinc finger and BTB domain containing 39 [Source:HGNC Symbol;Acc:HGNC:29014]	AFFY_PRIMEVIEW
1263	11725247_AT	1263.1	ENSG00000197037	ZSCAN25	zinc finger and SCAN domain containing 25 [Source:HGNC Symbol;Acc:HGNC:21961]	AFFY_PRIMEVIEW
1264	11725272_A_AT	1264.1	ENSG00000149380	P4HA3	prolyl 4-hydroxylase subunit alpha 3 [Source:HGNC Symbol;Acc:HGNC:30135]	AFFY_PRIMEVIEW
1265	11725282_A_AT	1265.1	ENSG00000258674	AC011448.1	N/A	AFFY_PRIMEVIEW
1265	11725282_A_AT	1265.2	ENSG00000250067	YJEFN3	YjeF N-terminal domain containing 3 [Source:HGNC Symbol;Acc:HGNC:24785]	AFFY_PRIMEVIEW
1266	11725283_S_AT	1266.1	ENSG00000184939	ZFP90	ZFP90 zinc finger protein [Source:HGNC Symbol;Acc:HGNC:23329]	AFFY_PRIMEVIEW
1267	11725289_A_AT	1267.1	ENSG00000265794	AC005899.4	N/A	AFFY_PRIMEVIEW
1267	11725289_A_AT	1267.2	ENSG00000141314	RHBDL3	rhomboid like 3 [Source:HGNC Symbol;Acc:HGNC:16502]	AFFY_PRIMEVIEW
1268	11725306_S_AT	1268.1	ENSG00000128595	CALU	calumenin [Source:HGNC Symbol;Acc:HGNC:1458]	AFFY_PRIMEVIEW
1269	11725307_S_AT	1269.1	ENSG00000128595	CALU	calumenin [Source:HGNC Symbol;Acc:HGNC:1458]	AFFY_PRIMEVIEW
1270	11725322_AT	1270.1	ENSG00000174276	ZNHIT2	zinc finger HIT-type containing 2 [Source:HGNC Symbol;Acc:HGNC:1177]	AFFY_PRIMEVIEW
1271	11725323_AT	1271.1	ENSG00000174276	ZNHIT2	zinc finger HIT-type containing 2 [Source:HGNC Symbol;Acc:HGNC:1177]	AFFY_PRIMEVIEW
1272	11725335_S_AT	1272.1	ENSG00000204899	MZT1	mitotic spindle organizing protein 1 [Source:HGNC Symbol;Acc:HGNC:33830]	AFFY_PRIMEVIEW
1273	11725346_X_AT	1273.1	ENSG00000215326	GPX1P2	glutathione peroxidase pseudogene 2 [Source:HGNC Symbol;Acc:HGNC:4561]	AFFY_PRIMEVIEW
1273	11725346_X_AT	1273.2	ENSG00000233276	GPX1	glutathione peroxidase 1 [Source:HGNC Symbol;Acc:HGNC:4553]	AFFY_PRIMEVIEW
1273	11725346_X_AT	1273.3	ENSG00000197582	GPX1P1	glutathione peroxidase pseudogene 1 [Source:HGNC Symbol;Acc:HGNC:4560]	AFFY_PRIMEVIEW
1274	11725353_AT	1274.1	ENSG00000178567	EPM2AIP1	EPM2A interacting protein 1 [Source:HGNC Symbol;Acc:HGNC:19735]	AFFY_PRIMEVIEW
1275	11725377_A_AT	1275.1	ENSG00000005156	LIG3	DNA ligase 3 [Source:HGNC Symbol;Acc:HGNC:6600]	AFFY_PRIMEVIEW
1276	11725395_AT	1276.1	ENSG00000105849	TWISTNB	TWIST neighbor [Source:HGNC Symbol;Acc:HGNC:18027]	AFFY_PRIMEVIEW
1277	11725417_A_AT	1277.1	ENSG00000087253	LPCAT2	lysophosphatidylcholine acyltransferase 2 [Source:HGNC Symbol;Acc:HGNC:26032]	AFFY_PRIMEVIEW
1278	11725431_AT	1278.1	ENSG00000244171	PBX2P1	PBX homeobox 2 pseudogene 1 [Source:HGNC Symbol;Acc:HGNC:8635]	AFFY_PRIMEVIEW
1278	11725431_AT	1278.2	ENSG00000273333	AL662884.1	N/A	AFFY_PRIMEVIEW
1278	11725431_AT	1278.3	ENSG00000204304	PBX2	PBX homeobox 2 [Source:HGNC Symbol;Acc:HGNC:8633]	AFFY_PRIMEVIEW
1279	11725439_AT	1279.1	ENSG00000223609	HBD	hemoglobin subunit delta [Source:HGNC Symbol;Acc:HGNC:4829]	AFFY_PRIMEVIEW
1280	11725440_A_AT	1280.1	ENSG00000064547	LPAR2	lysophosphatidic acid receptor 2 [Source:HGNC Symbol;Acc:HGNC:3168]	AFFY_PRIMEVIEW
1281	11725453_AT	1281.1	ENSG00000144035	NAT8	N-acetyltransferase 8 (putative) [Source:HGNC Symbol;Acc:HGNC:18069]	AFFY_PRIMEVIEW
1282	11725462_AT	1282.1	ENSG00000129933	MAU2	MAU2 sister chromatid cohesion factor [Source:HGNC Symbol;Acc:HGNC:29140]	AFFY_PRIMEVIEW
1283	11725463_X_AT	1283.1	ENSG00000129933	MAU2	MAU2 sister chromatid cohesion factor [Source:HGNC Symbol;Acc:HGNC:29140]	AFFY_PRIMEVIEW
1284	11725477_AT	1284.1	ENSG00000172818	OVOL1	ovo like transcriptional repressor 1 [Source:HGNC Symbol;Acc:HGNC:8525]	AFFY_PRIMEVIEW
1285	11725479_AT	1285.1	ENSG00000172818	OVOL1	ovo like transcriptional repressor 1 [Source:HGNC Symbol;Acc:HGNC:8525]	AFFY_PRIMEVIEW
1286	11725480_S_AT	1286.1	ENSG00000073050	XRCC1	X-ray repair cross complementing 1 [Source:HGNC Symbol;Acc:HGNC:12828]	AFFY_PRIMEVIEW
1287	11725494_AT	1287.1	ENSG00000172426	RSPH9	radial spoke head 9 homolog [Source:HGNC Symbol;Acc:HGNC:21057]	AFFY_PRIMEVIEW
1288	11725495_A_AT	1288.1	ENSG00000169855	ROBO1	roundabout guidance receptor 1 [Source:HGNC Symbol;Acc:HGNC:10249]	AFFY_PRIMEVIEW
1289	11725504_A_AT	1289.1	ENSG00000135414	GDF11	growth differentiation factor 11 [Source:HGNC Symbol;Acc:HGNC:4216]	AFFY_PRIMEVIEW
1290	11725513_A_AT	1290.1	ENSG00000101665	SMAD7	SMAD family member 7 [Source:HGNC Symbol;Acc:HGNC:6773]	AFFY_PRIMEVIEW
1291	11725519_A_AT	1291.1	ENSG00000003147	ICA1	islet cell autoantigen 1 [Source:HGNC Symbol;Acc:HGNC:5343]	AFFY_PRIMEVIEW
1292	11725526_AT	1292.1	ENSG00000221916	C19ORF73	chromosome 19 open reading frame 73 [Source:HGNC Symbol;Acc:HGNC:25534]	AFFY_PRIMEVIEW
1293	11725536_AT	1293.1	ENSG00000272031	ANKRD34A	ankyrin repeat domain 34A [Source:HGNC Symbol;Acc:HGNC:27639]	AFFY_PRIMEVIEW
1294	11725545_A_AT	1294.1	ENSG00000183715	OPCML	opioid binding protein/cell adhesion molecule like [Source:HGNC Symbol;Acc:HGNC:8143]	AFFY_PRIMEVIEW
1295	11725548_A_AT	1295.1	ENSG00000065989	PDE4A	phosphodiesterase 4A [Source:HGNC Symbol;Acc:HGNC:8780]	AFFY_PRIMEVIEW
1296	11725556_AT	1296.1	ENSG00000167157	PRRX2	paired related homeobox 2 [Source:HGNC Symbol;Acc:HGNC:21338]	AFFY_PRIMEVIEW
1297	11725560_A_AT	1297.1	ENSG00000122707	RECK	reversion inducing cysteine rich protein with kazal motifs [Source:HGNC Symbol;Acc:HGNC:11345]	AFFY_PRIMEVIEW
1298	11725562_AT	1298.1	ENSG00000124237	C20ORF85	chromosome 20 open reading frame 85 [Source:HGNC Symbol;Acc:HGNC:16216]	AFFY_PRIMEVIEW
1299	11725586_A_AT	1299.1	ENSG00000100228	RAB36	RAB36, member RAS oncogene family [Source:HGNC Symbol;Acc:HGNC:9775]	AFFY_PRIMEVIEW
1300	11725597_A_AT	1300.1	ENSG00000198203	SULT1C2	sulfotransferase family 1C member 2 [Source:HGNC Symbol;Acc:HGNC:11456]	AFFY_PRIMEVIEW
1301	11725600_AT	1301.1	ENSG00000198944	SOWAHA	sosondowah ankyrin repeat domain family member A [Source:HGNC Symbol;Acc:HGNC:27033]	AFFY_PRIMEVIEW
1302	11725605_A_AT	1302.1	ENSG00000077800	FKBP6	FK506 binding protein 6 [Source:HGNC Symbol;Acc:HGNC:3722]	AFFY_PRIMEVIEW
1303	11725609_A_AT	1303.1	ENSG00000134769	DTNA	dystrobrevin alpha [Source:HGNC Symbol;Acc:HGNC:3057]	AFFY_PRIMEVIEW
1304	11725625_S_AT	1304.1	ENSG00000130234	ACE2	angiotensin I converting enzyme 2 [Source:HGNC Symbol;Acc:HGNC:13557]	AFFY_PRIMEVIEW
1305	11725630_A_AT	1305.1	ENSG00000106263	EIF3B	eukaryotic translation initiation factor 3 subunit B [Source:HGNC Symbol;Acc:HGNC:3280]	AFFY_PRIMEVIEW
1306	11725643_A_AT	1306.1	ENSG00000125901	MRPS26	mitochondrial ribosomal protein S26 [Source:HGNC Symbol;Acc:HGNC:14045]	AFFY_PRIMEVIEW
1307	11725658_A_AT	1307.1	ENSG00000066855	MTFR1	mitochondrial fission regulator 1 [Source:HGNC Symbol;Acc:HGNC:29510]	AFFY_PRIMEVIEW
1308	11725669_AT	1308.1	ENSG00000153936	HS2ST1	heparan sulfate 2-O-sulfotransferase 1 [Source:HGNC Symbol;Acc:HGNC:5193]	AFFY_PRIMEVIEW
1309	11725686_A_AT	1309.1	ENSG00000151490	PTPRO	protein tyrosine phosphatase, receptor type O [Source:HGNC Symbol;Acc:HGNC:9678]	AFFY_PRIMEVIEW
1310	11725701_A_AT	1310.1	ENSG00000103569	AQP9	aquaporin 9 [Source:HGNC Symbol;Acc:HGNC:643]	AFFY_PRIMEVIEW
1311	11725707_A_AT	1311.1	ENSG00000166025	AMOTL1	angiomotin like 1 [Source:HGNC Symbol;Acc:HGNC:17811]	AFFY_PRIMEVIEW
1312	11725712_S_AT	1312.1	ENSG00000196262	PPIA	peptidylprolyl isomerase A [Source:HGNC Symbol;Acc:HGNC:9253]	AFFY_PRIMEVIEW
1313	11725716_A_AT	1313.1	ENSG00000139116	KIF21A	kinesin family member 21A [Source:HGNC Symbol;Acc:HGNC:19349]	AFFY_PRIMEVIEW
1314	11725722_AT	1314.1	ENSG00000156802	ATAD2	ATPase family, AAA domain containing 2 [Source:HGNC Symbol;Acc:HGNC:30123]	AFFY_PRIMEVIEW
1315	11725724_A_AT	1315.1	ENSG00000170231	FABP6	fatty acid binding protein 6 [Source:HGNC Symbol;Acc:HGNC:3561]	AFFY_PRIMEVIEW
1316	11725725_A_AT	1316.1	ENSG00000243156	MICAL3	microtubule associated monooxygenase, calponin and LIM domain containing 3 [Source:HGNC Symbol;Acc:HGNC:24694]	AFFY_PRIMEVIEW
1316	11725725_A_AT	1316.2	ENSG00000093100	AC016026.1	N/A	AFFY_PRIMEVIEW
1317	11725728_A_AT	1317.1	ENSG00000143443	C1ORF56	chromosome 1 open reading frame 56 [Source:HGNC Symbol;Acc:HGNC:26045]	AFFY_PRIMEVIEW
1318	11725730_A_AT	1318.1	ENSG00000007392	LUC7L	LUC7 like [Source:HGNC Symbol;Acc:HGNC:6723]	AFFY_PRIMEVIEW
1319	11725732_X_AT	1319.1	ENSG00000183426	NPIPA1	nuclear pore complex interacting protein family member A1 [Source:HGNC Symbol;Acc:HGNC:7909]	AFFY_PRIMEVIEW
1319	11725732_X_AT	1319.2	ENSG00000214967	NPIPA7	nuclear pore complex interacting protein family member A7 [Source:HGNC Symbol;Acc:HGNC:41982]	AFFY_PRIMEVIEW
1319	11725732_X_AT	1319.3	ENSG00000183889	AC138969.1	nuclear pore complex interacting protein family member A5 [Source:NCBI gene;Acc:100288332]	AFFY_PRIMEVIEW
1319	11725732_X_AT	1319.4	ENSG00000183793	NPIPA5	nuclear pore complex interacting protein family member A5 [Source:HGNC Symbol;Acc:HGNC:41980]	AFFY_PRIMEVIEW
1319	11725732_X_AT	1319.5	ENSG00000224712	NPIPA3	nuclear pore complex interacting protein family member A3 [Source:HGNC Symbol;Acc:HGNC:41978]	AFFY_PRIMEVIEW
1319	11725732_X_AT	1319.6	ENSG00000233024	AC126755.2	nuclear pore complex interacting protein family member A5 [Source:NCBI gene;Acc:100288332]	AFFY_PRIMEVIEW
1319	11725732_X_AT	1319.7	ENSG00000254852	NPIPA2	nuclear pore complex interacting protein family member A2 [Source:HGNC Symbol;Acc:HGNC:41979]	AFFY_PRIMEVIEW
1319	11725732_X_AT	1319.8	ENSG00000188599	NPIPP1	nuclear pore complex interacting protein pseudogene 1 [Source:HGNC Symbol;Acc:HGNC:35407]	AFFY_PRIMEVIEW
1319	11725732_X_AT	1319.9	ENSG00000270580	AC139256.2	N/A	AFFY_PRIMEVIEW
1319	11725732_X_AT	1319.1	ENSG00000214940	NPIPA8	nuclear pore complex interacting protein family member A8 [Source:HGNC Symbol;Acc:HGNC:41983]	AFFY_PRIMEVIEW
1320	11725734_A_AT	1320.1	ENSG00000001167	NFYA	nuclear transcription factor Y subunit alpha [Source:HGNC Symbol;Acc:HGNC:7804]	AFFY_PRIMEVIEW
1321	11725745_A_AT	1321.1	ENSG00000095637	SORBS1	sorbin and SH3 domain containing 1 [Source:HGNC Symbol;Acc:HGNC:14565]	AFFY_PRIMEVIEW
1322	11725746_A_AT	1322.1	ENSG00000154217	PITPNC1	phosphatidylinositol transfer protein cytoplasmic 1 [Source:HGNC Symbol;Acc:HGNC:21045]	AFFY_PRIMEVIEW
1323	11725748_A_AT	1323.1	ENSG00000213347	MXD3	MAX dimerization protein 3 [Source:HGNC Symbol;Acc:HGNC:14008]	AFFY_PRIMEVIEW
1324	11725765_A_AT	1324.1	ENSG00000060718	COL11A1	collagen type XI alpha 1 chain [Source:HGNC Symbol;Acc:HGNC:2186]	AFFY_PRIMEVIEW
1325	11725766_X_AT	1325.1	ENSG00000060718	COL11A1	collagen type XI alpha 1 chain [Source:HGNC Symbol;Acc:HGNC:2186]	AFFY_PRIMEVIEW
1326	11725776_A_AT	1326.1	ENSG00000166669	ATF7IP2	activating transcription factor 7 interacting protein 2 [Source:HGNC Symbol;Acc:HGNC:20397]	AFFY_PRIMEVIEW
1327	11725786_A_AT	1327.1	ENSG00000198498	TMA16	translation machinery associated 16 homolog [Source:HGNC Symbol;Acc:HGNC:25638]	AFFY_PRIMEVIEW
1328	11725787_A_AT	1328.1	ENSG00000198498	TMA16	translation machinery associated 16 homolog [Source:HGNC Symbol;Acc:HGNC:25638]	AFFY_PRIMEVIEW
1329	11725805_A_AT	1329.1	ENSG00000166704	ZNF606	zinc finger protein 606 [Source:HGNC Symbol;Acc:HGNC:25879]	AFFY_PRIMEVIEW
1330	11725808_X_AT	1330.1	ENSG00000064692	SNCAIP	synuclein alpha interacting protein [Source:HGNC Symbol;Acc:HGNC:11139]	AFFY_PRIMEVIEW
1331	11725811_AT	1331.1	ENSG00000127472	PLA2G5	phospholipase A2 group V [Source:HGNC Symbol;Acc:HGNC:9038]	AFFY_PRIMEVIEW
1332	11725816_A_AT	1332.1	ENSG00000169169	CPT1C	carnitine palmitoyltransferase 1C [Source:HGNC Symbol;Acc:HGNC:18540]	AFFY_PRIMEVIEW
1333	11725822_A_AT	1333.1	ENSG00000104369	JPH1	junctophilin 1 [Source:HGNC Symbol;Acc:HGNC:14201]	AFFY_PRIMEVIEW
1334	11725823_A_AT	1334.1	ENSG00000104369	JPH1	junctophilin 1 [Source:HGNC Symbol;Acc:HGNC:14201]	AFFY_PRIMEVIEW
1335	11725825_A_AT	1335.1	ENSG00000188910	GJB3	gap junction protein beta 3 [Source:HGNC Symbol;Acc:HGNC:4285]	AFFY_PRIMEVIEW
1336	11725837_A_AT	1336.1	ENSG00000000460	C1ORF112	chromosome 1 open reading frame 112 [Source:HGNC Symbol;Acc:HGNC:25565]	AFFY_PRIMEVIEW
1337	11725841_AT	1337.1	ENSG00000196812	ZSCAN16	zinc finger and SCAN domain containing 16 [Source:HGNC Symbol;Acc:HGNC:20813]	AFFY_PRIMEVIEW
1338	11725851_AT	1338.1	ENSG00000166188	ZNF319	zinc finger protein 319 [Source:HGNC Symbol;Acc:HGNC:13644]	AFFY_PRIMEVIEW
1339	11725856_A_AT	1339.1	ENSG00000114841	DNAH1	dynein axonemal heavy chain 1 [Source:HGNC Symbol;Acc:HGNC:2940]	AFFY_PRIMEVIEW
1340	11725858_AT	1340.1	ENSG00000151229	SLC2A13	solute carrier family 2 member 13 [Source:HGNC Symbol;Acc:HGNC:15956]	AFFY_PRIMEVIEW
1341	11725872_S_AT	1341.1	ENSG00000204611	ZNF616	zinc finger protein 616 [Source:HGNC Symbol;Acc:HGNC:28062]	AFFY_PRIMEVIEW
1342	11725874_A_AT	1342.1	ENSG00000186075	ZPBP2	zona pellucida binding protein 2 [Source:HGNC Symbol;Acc:HGNC:20678]	AFFY_PRIMEVIEW
1343	11725882_A_AT	1343.1	ENSG00000135119	RNFT2	ring finger protein, transmembrane 2 [Source:HGNC Symbol;Acc:HGNC:25905]	AFFY_PRIMEVIEW
1344	11725883_AT	1344.1	ENSG00000244476	ERVFRD-1	endogenous retrovirus group FRD member 1, envelope [Source:HGNC Symbol;Acc:HGNC:33823]	AFFY_PRIMEVIEW
1345	11725886_A_AT	1345.1	ENSG00000213398	LCAT	lecithin-cholesterol acyltransferase [Source:HGNC Symbol;Acc:HGNC:6522]	AFFY_PRIMEVIEW
1346	11725889_AT	1346.1	ENSG00000183019	MCEMP1	mast cell expressed membrane protein 1 [Source:HGNC Symbol;Acc:HGNC:27291]	AFFY_PRIMEVIEW
1347	11725893_AT	1347.1	ENSG00000164440	TXLNB	taxilin beta [Source:HGNC Symbol;Acc:HGNC:21617]	AFFY_PRIMEVIEW
1348	11725900_S_AT	1348.1	ENSG00000171492	LRRC8D	leucine rich repeat containing 8 VRAC subunit D [Source:HGNC Symbol;Acc:HGNC:16992]	AFFY_PRIMEVIEW
1349	11725906_A_AT	1349.1	ENSG00000186354	C9ORF47	chromosome 9 open reading frame 47 [Source:HGNC Symbol;Acc:HGNC:23669]	AFFY_PRIMEVIEW
1350	11725915_A_AT	1350.1	ENSG00000184271	POU6F1	POU class 6 homeobox 1 [Source:HGNC Symbol;Acc:HGNC:9224]	AFFY_PRIMEVIEW
1351	11725918_A_AT	1351.1	ENSG00000149639	SOGA1	suppressor of glucose, autophagy associated 1 [Source:HGNC Symbol;Acc:HGNC:16111]	AFFY_PRIMEVIEW
1352	11725920_A_AT	1352.1	ENSG00000168517	HEXIM2	hexamethylene bisacetamide inducible 2 [Source:HGNC Symbol;Acc:HGNC:28591]	AFFY_PRIMEVIEW
1353	11725938_AT	1353.1	ENSG00000165023	DIRAS2	DIRAS family GTPase 2 [Source:HGNC Symbol;Acc:HGNC:19323]	AFFY_PRIMEVIEW
1354	11725942_AT	1354.1	ENSG00000188064	WNT7B	Wnt family member 7B [Source:HGNC Symbol;Acc:HGNC:12787]	AFFY_PRIMEVIEW
1355	11725958_S_AT	1355.1	ENSG00000160014	CALM3	calmodulin 3 [Source:HGNC Symbol;Acc:HGNC:1449]	AFFY_PRIMEVIEW
1356	11725959_X_AT	1356.1	ENSG00000160014	CALM3	calmodulin 3 [Source:HGNC Symbol;Acc:HGNC:1449]	AFFY_PRIMEVIEW
1357	11725974_S_AT	1357.1	ENSG00000196313	POM121	POM121 transmembrane nucleoporin [Source:HGNC Symbol;Acc:HGNC:19702]	AFFY_PRIMEVIEW
1357	11725974_S_AT	1357.2	ENSG00000272391	POM121C	POM121 transmembrane nucleoporin C [Source:HGNC Symbol;Acc:HGNC:34005]	AFFY_PRIMEVIEW
1357	11725974_S_AT	1357.3	ENSG00000205578	POM121B	POM121 transmembrane nucleoporin B (pseudogene) [Source:HGNC Symbol;Acc:HGNC:34004]	AFFY_PRIMEVIEW
1358	11725975_AT	1358.1	ENSG00000196313	POM121	POM121 transmembrane nucleoporin [Source:HGNC Symbol;Acc:HGNC:19702]	AFFY_PRIMEVIEW
1359	11725976_A_AT	1359.1	ENSG00000105875	WDR91	WD repeat domain 91 [Source:HGNC Symbol;Acc:HGNC:24997]	AFFY_PRIMEVIEW
1360	11725979_A_AT	1360.1	ENSG00000104327	CALB1	calbindin 1 [Source:HGNC Symbol;Acc:HGNC:1434]	AFFY_PRIMEVIEW
1361	11725988_AT	1361.1	ENSG00000157227	MMP14	matrix metallopeptidase 14 [Source:HGNC Symbol;Acc:HGNC:7160]	AFFY_PRIMEVIEW
1362	11725995_X_AT	1362.1	ENSG00000173950	XXYLT1	xyloside xylosyltransferase 1 [Source:HGNC Symbol;Acc:HGNC:26639]	AFFY_PRIMEVIEW
1363	11725996_A_AT	1363.1	ENSG00000109832	DDX25	DEAD-box helicase 25 [Source:HGNC Symbol;Acc:HGNC:18698]	AFFY_PRIMEVIEW
1364	11726005_A_AT	1364.1	ENSG00000184588	PDE4B	phosphodiesterase 4B [Source:HGNC Symbol;Acc:HGNC:8781]	AFFY_PRIMEVIEW
1365	11726018_A_AT	1365.1	ENSG00000173065	FAM222B	family with sequence similarity 222 member B [Source:HGNC Symbol;Acc:HGNC:25563]	AFFY_PRIMEVIEW
1366	11726024_AT	1366.1	ENSG00000078401	EDN1	endothelin 1 [Source:HGNC Symbol;Acc:HGNC:3176]	AFFY_PRIMEVIEW
1367	11726035_AT	1367.1	ENSG00000164708	PGAM2	phosphoglycerate mutase 2 [Source:HGNC Symbol;Acc:HGNC:8889]	AFFY_PRIMEVIEW
1368	11726044_A_AT	1368.1	ENSG00000204305	AGER	advanced glycosylation end-product specific receptor [Source:HGNC Symbol;Acc:HGNC:320]	AFFY_PRIMEVIEW
1369	11726053_A_AT	1369.1	ENSG00000228300	C19ORF24	chromosome 19 open reading frame 24 [Source:HGNC Symbol;Acc:HGNC:26073]	AFFY_PRIMEVIEW
1370	11726058_A_AT	1370.1	ENSG00000166024	R3HCC1L	R3H domain and coiled-coil containing 1 like [Source:HGNC Symbol;Acc:HGNC:23512]	AFFY_PRIMEVIEW
1371	11726062_AT	1371.1	ENSG00000160013	PTGIR	prostaglandin I2 receptor [Source:HGNC Symbol;Acc:HGNC:9602]	AFFY_PRIMEVIEW
1372	11726065_A_AT	1372.1	ENSG00000197713	RPE	ribulose-5-phosphate-3-epimerase [Source:HGNC Symbol;Acc:HGNC:10293]	AFFY_PRIMEVIEW
1373	11726070_S_AT	1373.1	ENSG00000071054	MAP4K4	mitogen-activated protein kinase kinase kinase kinase 4 [Source:HGNC Symbol;Acc:HGNC:6866]	AFFY_PRIMEVIEW
1374	11726071_A_AT	1374.1	ENSG00000071054	MAP4K4	mitogen-activated protein kinase kinase kinase kinase 4 [Source:HGNC Symbol;Acc:HGNC:6866]	AFFY_PRIMEVIEW
1375	11726084_A_AT	1375.1	ENSG00000165716	FAM69B	family with sequence similarity 69 member B [Source:HGNC Symbol;Acc:HGNC:28290]	AFFY_PRIMEVIEW
1376	11726085_AT	1376.1	N/A	N/A	N/A	N/A
1377	11726086_X_AT	1377.1	ENSG00000130921	C12ORF65	chromosome 12 open reading frame 65 [Source:HGNC Symbol;Acc:HGNC:26784]	AFFY_PRIMEVIEW
1378	11726106_AT	1378.1	ENSG00000126243	LRFN3	leucine rich repeat and fibronectin type III domain containing 3 [Source:HGNC Symbol;Acc:HGNC:28370]	AFFY_PRIMEVIEW
1379	11726110_A_AT	1379.1	ENSG00000099364	FBXL19	F-box and leucine rich repeat protein 19 [Source:HGNC Symbol;Acc:HGNC:25300]	AFFY_PRIMEVIEW
1379	11726110_A_AT	1379.2	ENSG00000261487	AC135048.1	N/A	AFFY_PRIMEVIEW
1380	11726115_AT	1380.1	ENSG00000099810	MTAP	methylthioadenosine phosphorylase [Source:HGNC Symbol;Acc:HGNC:7413]	AFFY_PRIMEVIEW
1381	11726117_A_AT	1381.1	ENSG00000099810	MTAP	methylthioadenosine phosphorylase [Source:HGNC Symbol;Acc:HGNC:7413]	AFFY_PRIMEVIEW
1382	11726119_AT	1382.1	ENSG00000156313	RPGR	retinitis pigmentosa GTPase regulator [Source:HGNC Symbol;Acc:HGNC:10295]	AFFY_PRIMEVIEW
1383	11726154_S_AT	1383.1	ENSG00000219438	FAM19A5	family with sequence similarity 19 member A5, C-C motif chemokine like [Source:HGNC Symbol;Acc:HGNC:21592]	AFFY_PRIMEVIEW
1384	11726157_AT	1384.1	ENSG00000186767	SPIN4	spindlin family member 4 [Source:HGNC Symbol;Acc:HGNC:27040]	AFFY_PRIMEVIEW
1385	11726160_A_AT	1385.1	ENSG00000007001	UPP2	uridine phosphorylase 2 [Source:HGNC Symbol;Acc:HGNC:23061]	AFFY_PRIMEVIEW
1386	11726177_S_AT	1386.1	ENSG00000227234	SPANXB1	SPANX family member B1 [Source:HGNC Symbol;Acc:HGNC:14329]	AFFY_PRIMEVIEW
1387	11726182_AT	1387.1	ENSG00000160161	CILP2	cartilage intermediate layer protein 2 [Source:HGNC Symbol;Acc:HGNC:24213]	AFFY_PRIMEVIEW
1388	11726194_A_AT	1388.1	ENSG00000125744	RTN2	reticulon 2 [Source:HGNC Symbol;Acc:HGNC:10468]	AFFY_PRIMEVIEW
1389	11726198_AT	1389.1	ENSG00000157152	SYN2	synapsin II [Source:HGNC Symbol;Acc:HGNC:11495]	AFFY_PRIMEVIEW
1390	11726200_AT	1390.1	ENSG00000150281	CTF1	cardiotrophin 1 [Source:HGNC Symbol;Acc:HGNC:2499]	AFFY_PRIMEVIEW
1391	11726233_A_AT	1391.1	ENSG00000171962	DRC3	dynein regulatory complex subunit 3 [Source:HGNC Symbol;Acc:HGNC:25384]	AFFY_PRIMEVIEW
1392	11726242_A_AT	1392.1	ENSG00000007350	TKTL1	transketolase like 1 [Source:HGNC Symbol;Acc:HGNC:11835]	AFFY_PRIMEVIEW
1393	11726252_A_AT	1393.1	ENSG00000079215	SLC1A3	solute carrier family 1 member 3 [Source:HGNC Symbol;Acc:HGNC:10941]	AFFY_PRIMEVIEW
1394	11726253_A_AT	1394.1	ENSG00000135334	AKIRIN2	akirin 2 [Source:HGNC Symbol;Acc:HGNC:21407]	AFFY_PRIMEVIEW
1395	11726280_A_AT	1395.1	ENSG00000186716	BCR	BCR, RhoGEF and GTPase activating protein [Source:HGNC Symbol;Acc:HGNC:1014]	AFFY_PRIMEVIEW
1396	11726281_X_AT	1396.1	ENSG00000186716	BCR	BCR, RhoGEF and GTPase activating protein [Source:HGNC Symbol;Acc:HGNC:1014]	AFFY_PRIMEVIEW
1397	11726306_AT	1397.1	ENSG00000165669	FAM204A	family with sequence similarity 204 member A [Source:HGNC Symbol;Acc:HGNC:25794]	AFFY_PRIMEVIEW
1398	11726317_AT	1398.1	ENSG00000007908	SELE	selectin E [Source:HGNC Symbol;Acc:HGNC:10718]	AFFY_PRIMEVIEW
1399	11726319_AT	1399.1	ENSG00000123124	WWP1	WW domain containing E3 ubiquitin protein ligase 1 [Source:HGNC Symbol;Acc:HGNC:17004]	AFFY_PRIMEVIEW
1400	11726320_AT	1400.1	ENSG00000197930	ERO1A	endoplasmic reticulum oxidoreductase 1 alpha [Source:HGNC Symbol;Acc:HGNC:13280]	AFFY_PRIMEVIEW
1401	11726325_AT	1401.1	ENSG00000046774	MAGEC2	MAGE family member C2 [Source:HGNC Symbol;Acc:HGNC:13574]	AFFY_PRIMEVIEW
1402	11726333_S_AT	1402.1	ENSG00000138795	LEF1	lymphoid enhancer binding factor 1 [Source:HGNC Symbol;Acc:HGNC:6551]	AFFY_PRIMEVIEW
1403	11726337_A_AT	1403.1	ENSG00000012779	ALOX5	arachidonate 5-lipoxygenase [Source:HGNC Symbol;Acc:HGNC:435]	AFFY_PRIMEVIEW
1404	11726346_A_AT	1404.1	ENSG00000086730	LAT2	linker for activation of T cells family member 2 [Source:HGNC Symbol;Acc:HGNC:12749]	AFFY_PRIMEVIEW
1405	11726348_A_AT	1405.1	ENSG00000158636	EMSY	EMSY, BRCA2 interacting transcriptional repressor [Source:HGNC Symbol;Acc:HGNC:18071]	AFFY_PRIMEVIEW
1406	11726361_A_AT	1406.1	ENSG00000066427	ATXN3	ataxin 3 [Source:HGNC Symbol;Acc:HGNC:7106]	AFFY_PRIMEVIEW
1407	11726363_X_AT	1407.1	ENSG00000066427	ATXN3	ataxin 3 [Source:HGNC Symbol;Acc:HGNC:7106]	AFFY_PRIMEVIEW
1408	11726380_AT	1408.1	ENSG00000109685	NSD2	nuclear receptor binding SET domain protein 2 [Source:HGNC Symbol;Acc:HGNC:12766]	AFFY_PRIMEVIEW
1409	11726381_A_AT	1409.1	ENSG00000166471	TMEM41B	transmembrane protein 41B [Source:HGNC Symbol;Acc:HGNC:28948]	AFFY_PRIMEVIEW
1410	11726396_X_AT	1410.1	ENSG00000011201	ANOS1	anosmin 1 [Source:HGNC Symbol;Acc:HGNC:6211]	AFFY_PRIMEVIEW
1411	11726403_AT	1411.1	ENSG00000188770	OPTC	opticin [Source:HGNC Symbol;Acc:HGNC:8158]	AFFY_PRIMEVIEW
1412	11726410_AT	1412.1	ENSG00000141034	GID4	GID complex subunit 4 homolog [Source:HGNC Symbol;Acc:HGNC:28453]	AFFY_PRIMEVIEW
1413	11726422_AT	1413.1	ENSG00000185798	WDR53	WD repeat domain 53 [Source:HGNC Symbol;Acc:HGNC:28786]	AFFY_PRIMEVIEW
1414	11726423_A_AT	1414.1	ENSG00000166257	SCN3B	sodium voltage-gated channel beta subunit 3 [Source:HGNC Symbol;Acc:HGNC:20665]	AFFY_PRIMEVIEW
1415	11726429_A_AT	1415.1	ENSG00000100027	YPEL1	yippee like 1 [Source:HGNC Symbol;Acc:HGNC:12845]	AFFY_PRIMEVIEW
1416	11726437_A_AT	1416.1	ENSG00000170293	CMTM8	CKLF like MARVEL transmembrane domain containing 8 [Source:HGNC Symbol;Acc:HGNC:19179]	AFFY_PRIMEVIEW
1417	11726443_A_AT	1417.1	ENSG00000168301	KCTD6	potassium channel tetramerization domain containing 6 [Source:HGNC Symbol;Acc:HGNC:22235]	AFFY_PRIMEVIEW
1418	11726448_AT	1418.1	ENSG00000142556	ZNF614	zinc finger protein 614 [Source:HGNC Symbol;Acc:HGNC:24722]	AFFY_PRIMEVIEW
1419	11726460_AT	1419.1	ENSG00000138439	FAM117B	family with sequence similarity 117 member B [Source:HGNC Symbol;Acc:HGNC:14440]	AFFY_PRIMEVIEW
1420	11726466_AT	1420.1	ENSG00000258713	C20ORF141	chromosome 20 open reading frame 141 [Source:HGNC Symbol;Acc:HGNC:16134]	AFFY_PRIMEVIEW
1421	11726474_A_AT	1421.1	ENSG00000188290	HES4	hes family bHLH transcription factor 4 [Source:HGNC Symbol;Acc:HGNC:24149]	AFFY_PRIMEVIEW
1422	11726475_A_AT	1422.1	ENSG00000178821	TMEM52	transmembrane protein 52 [Source:HGNC Symbol;Acc:HGNC:27916]	AFFY_PRIMEVIEW
1423	11726483_AT	1423.1	ENSG00000254004	ZNF260	zinc finger protein 260 [Source:HGNC Symbol;Acc:HGNC:13499]	AFFY_PRIMEVIEW
1424	11726495_A_AT	1424.1	ENSG00000157343	ARMC12	armadillo repeat containing 12 [Source:HGNC Symbol;Acc:HGNC:21099]	AFFY_PRIMEVIEW
1425	11726520_A_AT	1425.1	ENSG00000105982	RNF32	ring finger protein 32 [Source:HGNC Symbol;Acc:HGNC:17118]	AFFY_PRIMEVIEW
1426	11726523_S_AT	1426.1	ENSG00000140836	ZFHX3	zinc finger homeobox 3 [Source:HGNC Symbol;Acc:HGNC:777]	AFFY_PRIMEVIEW
1427	11726527_S_AT	1427.1	ENSG00000198948	MFAP3L	microfibril associated protein 3 like [Source:HGNC Symbol;Acc:HGNC:29083]	AFFY_PRIMEVIEW
1428	11726536_AT	1428.1	ENSG00000140465	CYP1A1	cytochrome P450 family 1 subfamily A member 1 [Source:HGNC Symbol;Acc:HGNC:2595]	AFFY_PRIMEVIEW
1429	11726544_AT	1429.1	ENSG00000197136	PCNX3	pecanex homolog 3 [Source:HGNC Symbol;Acc:HGNC:18760]	AFFY_PRIMEVIEW
1429	11726544_AT	1429.2	ENSG00000266041	MIR4690	microRNA 4690 [Source:HGNC Symbol;Acc:HGNC:41707]	AFFY_PRIMEVIEW
1430	11726550_A_AT	1430.1	ENSG00000147082	CCNB3	cyclin B3 [Source:HGNC Symbol;Acc:HGNC:18709]	AFFY_PRIMEVIEW
1431	11726551_S_AT	1431.1	ENSG00000131015	ULBP2	UL16 binding protein 2 [Source:HGNC Symbol;Acc:HGNC:14894]	AFFY_PRIMEVIEW
1431	11726551_S_AT	1431.2	ENSG00000155918	RAET1L	retinoic acid early transcript 1L [Source:HGNC Symbol;Acc:HGNC:16798]	AFFY_PRIMEVIEW
1432	11726552_X_AT	1432.1	ENSG00000131015	ULBP2	UL16 binding protein 2 [Source:HGNC Symbol;Acc:HGNC:14894]	AFFY_PRIMEVIEW
1433	11726569_A_AT	1433.1	ENSG00000196104	SPOCK3	SPARC (osteonectin), cwcv and kazal like domains proteoglycan 3 [Source:HGNC Symbol;Acc:HGNC:13565]	AFFY_PRIMEVIEW
1434	11726577_A_AT	1434.1	ENSG00000142655	PEX14	peroxisomal biogenesis factor 14 [Source:HGNC Symbol;Acc:HGNC:8856]	AFFY_PRIMEVIEW
1435	11726587_A_AT	1435.1	ENSG00000143374	TARS2	threonyl-tRNA synthetase 2, mitochondrial [Source:HGNC Symbol;Acc:HGNC:30740]	AFFY_PRIMEVIEW
1436	11726609_AT	1436.1	ENSG00000143033	MTF2	metal response element binding transcription factor 2 [Source:HGNC Symbol;Acc:HGNC:29535]	AFFY_PRIMEVIEW
1437	11726611_X_AT	1437.1	ENSG00000185022	MAFF	MAF bZIP transcription factor F [Source:HGNC Symbol;Acc:HGNC:6780]	AFFY_PRIMEVIEW
1438	11726614_AT	1438.1	ENSG00000170558	CDH2	cadherin 2 [Source:HGNC Symbol;Acc:HGNC:1759]	AFFY_PRIMEVIEW
1439	11726616_A_AT	1439.1	ENSG00000019169	MARCO	macrophage receptor with collagenous structure [Source:HGNC Symbol;Acc:HGNC:6895]	AFFY_PRIMEVIEW
1440	11726622_A_AT	1440.1	ENSG00000083520	DIS3	DIS3 homolog, exosome endoribonuclease and 3'-5' exoribonuclease [Source:HGNC Symbol;Acc:HGNC:20604]	AFFY_PRIMEVIEW
1441	11726623_A_AT	1441.1	ENSG00000083520	DIS3	DIS3 homolog, exosome endoribonuclease and 3'-5' exoribonuclease [Source:HGNC Symbol;Acc:HGNC:20604]	AFFY_PRIMEVIEW
1442	11726627_AT	1442.1	ENSG00000135482	ZC3H10	zinc finger CCCH-type containing 10 [Source:HGNC Symbol;Acc:HGNC:25893]	AFFY_PRIMEVIEW
1443	11726631_AT	1443.1	ENSG00000171206	TRIM8	tripartite motif containing 8 [Source:HGNC Symbol;Acc:HGNC:15579]	AFFY_PRIMEVIEW
1444	11726635_A_AT	1444.1	ENSG00000083168	KAT6A	lysine acetyltransferase 6A [Source:HGNC Symbol;Acc:HGNC:13013]	AFFY_PRIMEVIEW
1445	11726658_A_AT	1445.1	ENSG00000163485	ADORA1	adenosine A1 receptor [Source:HGNC Symbol;Acc:HGNC:262]	AFFY_PRIMEVIEW
1446	11726665_A_AT	1446.1	ENSG00000140332	TLE3	transducin like enhancer of split 3 [Source:HGNC Symbol;Acc:HGNC:11839]	AFFY_PRIMEVIEW
1447	11726670_A_AT	1447.1	ENSG00000118655	DCLRE1B	DNA cross-link repair 1B [Source:HGNC Symbol;Acc:HGNC:17641]	AFFY_PRIMEVIEW
1448	11726688_AT	1448.1	ENSG00000164047	CAMP	cathelicidin antimicrobial peptide [Source:HGNC Symbol;Acc:HGNC:1472]	AFFY_PRIMEVIEW
1449	11726694_A_AT	1449.1	ENSG00000143793	C1ORF35	chromosome 1 open reading frame 35 [Source:HGNC Symbol;Acc:HGNC:19032]	AFFY_PRIMEVIEW
1450	11726706_AT	1450.1	ENSG00000157368	IL34	interleukin 34 [Source:HGNC Symbol;Acc:HGNC:28529]	AFFY_PRIMEVIEW
1451	11726711_X_AT	1451.1	ENSG00000178921	PFAS	phosphoribosylformylglycinamidine synthase [Source:HGNC Symbol;Acc:HGNC:8863]	AFFY_PRIMEVIEW
1452	11726717_AT	1452.1	ENSG00000162757	C1ORF74	chromosome 1 open reading frame 74 [Source:HGNC Symbol;Acc:HGNC:26319]	AFFY_PRIMEVIEW
1453	11726721_X_AT	1453.1	ENSG00000103152	MPG	N-methylpurine DNA glycosylase [Source:HGNC Symbol;Acc:HGNC:7211]	AFFY_PRIMEVIEW
1454	11726722_AT	1454.1	ENSG00000139668	WDFY2	WD repeat and FYVE domain containing 2 [Source:HGNC Symbol;Acc:HGNC:20482]	AFFY_PRIMEVIEW
1455	11726727_A_AT	1455.1	ENSG00000173559	NABP1	nucleic acid binding protein 1 [Source:HGNC Symbol;Acc:HGNC:26232]	AFFY_PRIMEVIEW
1456	11726738_A_AT	1456.1	ENSG00000103356	EARS2	glutamyl-tRNA synthetase 2, mitochondrial [Source:HGNC Symbol;Acc:HGNC:29419]	AFFY_PRIMEVIEW
1457	11726739_X_AT	1457.1	ENSG00000103356	EARS2	glutamyl-tRNA synthetase 2, mitochondrial [Source:HGNC Symbol;Acc:HGNC:29419]	AFFY_PRIMEVIEW
1458	11726743_AT	1458.1	ENSG00000164220	F2RL2	coagulation factor II thrombin receptor like 2 [Source:HGNC Symbol;Acc:HGNC:3539]	AFFY_PRIMEVIEW
1459	11726752_AT	1459.1	ENSG00000157693	TMEM268	transmembrane protein 268 [Source:HGNC Symbol;Acc:HGNC:24513]	AFFY_PRIMEVIEW
1460	11726753_A_AT	1460.1	ENSG00000157693	TMEM268	transmembrane protein 268 [Source:HGNC Symbol;Acc:HGNC:24513]	AFFY_PRIMEVIEW
1461	11726756_A_AT	1461.1	ENSG00000164045	CDC25A	cell division cycle 25A [Source:HGNC Symbol;Acc:HGNC:1725]	AFFY_PRIMEVIEW
1462	11726758_A_AT	1462.1	ENSG00000164045	CDC25A	cell division cycle 25A [Source:HGNC Symbol;Acc:HGNC:1725]	AFFY_PRIMEVIEW
1463	11726761_X_AT	1463.1	ENSG00000173653	RCE1	Ras converting CAAX endopeptidase 1 [Source:HGNC Symbol;Acc:HGNC:13721]	AFFY_PRIMEVIEW
1464	11726769_A_AT	1464.1	ENSG00000132530	XAF1	XIAP associated factor 1 [Source:HGNC Symbol;Acc:HGNC:30932]	AFFY_PRIMEVIEW
1465	11726770_X_AT	1465.1	ENSG00000132530	XAF1	XIAP associated factor 1 [Source:HGNC Symbol;Acc:HGNC:30932]	AFFY_PRIMEVIEW
1466	11726771_A_AT	1466.1	ENSG00000132530	XAF1	XIAP associated factor 1 [Source:HGNC Symbol;Acc:HGNC:30932]	AFFY_PRIMEVIEW
1467	11726772_A_AT	1467.1	ENSG00000163558	PRKCI	protein kinase C iota [Source:HGNC Symbol;Acc:HGNC:9404]	AFFY_PRIMEVIEW
1468	11726778_AT	1468.1	ENSG00000111335	OAS2	2'-5'-oligoadenylate synthetase 2 [Source:HGNC Symbol;Acc:HGNC:8087]	AFFY_PRIMEVIEW
1469	11726781_A_AT	1469.1	ENSG00000075340	ADD2	adducin 2 [Source:HGNC Symbol;Acc:HGNC:244]	AFFY_PRIMEVIEW
1470	11726793_A_AT	1470.1	ENSG00000132470	ITGB4	integrin subunit beta 4 [Source:HGNC Symbol;Acc:HGNC:6158]	AFFY_PRIMEVIEW
1471	11726805_S_AT	1471.1	ENSG00000110536	PTPMT1	protein tyrosine phosphatase, mitochondrial 1 [Source:HGNC Symbol;Acc:HGNC:26965]	AFFY_PRIMEVIEW
1472	11726818_AT	1472.1	ENSG00000188807	TMEM201	transmembrane protein 201 [Source:HGNC Symbol;Acc:HGNC:33719]	AFFY_PRIMEVIEW
1473	11726821_AT	1473.1	ENSG00000147113	CXORF36	chromosome X open reading frame 36 [Source:HGNC Symbol;Acc:HGNC:25866]	AFFY_PRIMEVIEW
1474	11726848_A_AT	1474.1	ENSG00000082684	SEMA5B	semaphorin 5B [Source:HGNC Symbol;Acc:HGNC:10737]	AFFY_PRIMEVIEW
1475	11726852_A_AT	1475.1	ENSG00000183307	TMEM121B	transmembrane protein 121B [Source:HGNC Symbol;Acc:HGNC:1844]	AFFY_PRIMEVIEW
1476	11726877_AT	1476.1	ENSG00000189280	GJB5	gap junction protein beta 5 [Source:HGNC Symbol;Acc:HGNC:4287]	AFFY_PRIMEVIEW
1477	11726893_A_AT	1477.1	ENSG00000004866	ST7	suppression of tumorigenicity 7 [Source:HGNC Symbol;Acc:HGNC:11351]	AFFY_PRIMEVIEW
1478	11726899_AT	1478.1	ENSG00000197106	SLC6A17	solute carrier family 6 member 17 [Source:HGNC Symbol;Acc:HGNC:31399]	AFFY_PRIMEVIEW
1479	11726908_A_AT	1479.1	ENSG00000047617	ANO2	anoctamin 2 [Source:HGNC Symbol;Acc:HGNC:1183]	AFFY_PRIMEVIEW
1480	11726912_A_AT	1480.1	ENSG00000086570	FAT2	FAT atypical cadherin 2 [Source:HGNC Symbol;Acc:HGNC:3596]	AFFY_PRIMEVIEW
1481	11726915_AT	1481.1	ENSG00000173930	SLCO4C1	solute carrier organic anion transporter family member 4C1 [Source:HGNC Symbol;Acc:HGNC:23612]	AFFY_PRIMEVIEW
1482	11726921_A_AT	1482.1	ENSG00000141337	ARSG	arylsulfatase G [Source:HGNC Symbol;Acc:HGNC:24102]	AFFY_PRIMEVIEW
1482	11726921_A_AT	1482.2	ENSG00000267009	AC007780.1	N/A	AFFY_PRIMEVIEW
1483	11726926_S_AT	1483.1	ENSG00000230347	CT47A8	cancer/testis antigen family 47, member A8 [Source:HGNC Symbol;Acc:HGNC:33289]	AFFY_PRIMEVIEW
1483	11726926_S_AT	1483.2	ENSG00000226023	CT47A6	cancer/testis antigen family 47, member A6 [Source:HGNC Symbol;Acc:HGNC:33287]	AFFY_PRIMEVIEW
1483	11726926_S_AT	1483.3	ENSG00000237957	CT47A5	cancer/testis antigen family 47, member A5 [Source:HGNC Symbol;Acc:HGNC:33286]	AFFY_PRIMEVIEW
1483	11726926_S_AT	1483.4	ENSG00000226600	CT47A9	cancer/testis antigen family 47, member A9 [Source:HGNC Symbol;Acc:HGNC:33290]	AFFY_PRIMEVIEW
1483	11726926_S_AT	1483.5	ENSG00000226685	CT47A12	cancer/testis antigen family 47, member A12 [Source:HGNC Symbol;Acc:HGNC:33292]	AFFY_PRIMEVIEW
1483	11726926_S_AT	1483.6	ENSG00000236446	CT47B1	cancer/testis antigen family 47, member B1 [Source:HGNC Symbol;Acc:HGNC:33293]	AFFY_PRIMEVIEW
1483	11726926_S_AT	1483.7	ENSG00000242362	CT47A2	cancer/testis antigen family 47, member A2 [Source:HGNC Symbol;Acc:HGNC:33283]	AFFY_PRIMEVIEW
1483	11726926_S_AT	1483.8	ENSG00000224089	CT47A10	cancer/testis antigen family 47, member A10 [Source:HGNC Symbol;Acc:HGNC:33291]	AFFY_PRIMEVIEW
1483	11726926_S_AT	1483.9	ENSG00000236371	CT47A1	cancer/testis antigen family 47, member A1 [Source:HGNC Symbol;Acc:HGNC:33282]	AFFY_PRIMEVIEW
1483	11726926_S_AT	1483.1	ENSG00000236126	CT47A3	cancer/testis antigen family 47, member A3 [Source:HGNC Symbol;Acc:HGNC:33284]	AFFY_PRIMEVIEW
1483	11726926_S_AT	1483.11	ENSG00000228517	CT47A7	cancer/testis antigen family 47, member A7 [Source:HGNC Symbol;Acc:HGNC:33288]	AFFY_PRIMEVIEW
1483	11726926_S_AT	1483.12	ENSG00000226929	CT47A11	cancer/testis antigen family 47, member A11 [Source:HGNC Symbol;Acc:HGNC:27397]	AFFY_PRIMEVIEW
1483	11726926_S_AT	1483.13	ENSG00000230594	CT47A4	cancer/testis antigen family 47, member A4 [Source:HGNC Symbol;Acc:HGNC:33285]	AFFY_PRIMEVIEW
1484	11726928_S_AT	1484.1	ENSG00000137496	IL18BP	interleukin 18 binding protein [Source:HGNC Symbol;Acc:HGNC:5987]	AFFY_PRIMEVIEW
1485	11726944_X_AT	1485.1	ENSG00000155592	ZKSCAN2	zinc finger with KRAB and SCAN domains 2 [Source:HGNC Symbol;Acc:HGNC:25677]	AFFY_PRIMEVIEW
1486	11726949_S_AT	1486.1	ENSG00000162775	RBM15	RNA binding motif protein 15 [Source:HGNC Symbol;Acc:HGNC:14959]	AFFY_PRIMEVIEW
1487	11726951_S_AT	1487.1	ENSG00000159784	FAM131B	family with sequence similarity 131 member B [Source:HGNC Symbol;Acc:HGNC:22202]	AFFY_PRIMEVIEW
1488	11726952_A_AT	1488.1	ENSG00000159784	FAM131B	family with sequence similarity 131 member B [Source:HGNC Symbol;Acc:HGNC:22202]	AFFY_PRIMEVIEW
1489	11726953_AT	1489.1	ENSG00000138316	ADAMTS14	ADAM metallopeptidase with thrombospondin type 1 motif 14 [Source:HGNC Symbol;Acc:HGNC:14899]	AFFY_PRIMEVIEW
1490	11726956_AT	1490.1	ENSG00000179772	FOXS1	forkhead box S1 [Source:HGNC Symbol;Acc:HGNC:3735]	AFFY_PRIMEVIEW
1491	11726959_A_AT	1491.1	ENSG00000183454	GRIN2A	glutamate ionotropic receptor NMDA type subunit 2A [Source:HGNC Symbol;Acc:HGNC:4585]	AFFY_PRIMEVIEW
1492	11726967_A_AT	1492.1	ENSG00000169436	COL22A1	collagen type XXII alpha 1 chain [Source:HGNC Symbol;Acc:HGNC:22989]	AFFY_PRIMEVIEW
1493	11726968_A_AT	1493.1	ENSG00000124243	BCAS4	breast carcinoma amplified sequence 4 [Source:HGNC Symbol;Acc:HGNC:14367]	AFFY_PRIMEVIEW
1494	11726976_AT	1494.1	ENSG00000112378	PERP	PERP, TP53 apoptosis effector [Source:HGNC Symbol;Acc:HGNC:17637]	AFFY_PRIMEVIEW
1495	11726988_S_AT	1495.1	ENSG00000086232	EIF2AK1	eukaryotic translation initiation factor 2 alpha kinase 1 [Source:HGNC Symbol;Acc:HGNC:24921]	AFFY_PRIMEVIEW
1496	11726989_X_AT	1496.1	ENSG00000086232	EIF2AK1	eukaryotic translation initiation factor 2 alpha kinase 1 [Source:HGNC Symbol;Acc:HGNC:24921]	AFFY_PRIMEVIEW
1497	11726991_S_AT	1497.1	ENSG00000086232	EIF2AK1	eukaryotic translation initiation factor 2 alpha kinase 1 [Source:HGNC Symbol;Acc:HGNC:24921]	AFFY_PRIMEVIEW
1498	11726998_S_AT	1498.1	ENSG00000184697	CLDN6	claudin 6 [Source:HGNC Symbol;Acc:HGNC:2048]	AFFY_PRIMEVIEW
1499	11727013_A_AT	1499.1	ENSG00000101489	CELF4	CUGBP Elav-like family member 4 [Source:HGNC Symbol;Acc:HGNC:14015]	AFFY_PRIMEVIEW
1500	11727024_A_AT	1500.1	ENSG00000158480	SPATA2	spermatogenesis associated 2 [Source:HGNC Symbol;Acc:HGNC:14681]	AFFY_PRIMEVIEW
1501	11727025_A_AT	1501.1	ENSG00000160688	FLAD1	flavin adenine dinucleotide synthetase 1 [Source:HGNC Symbol;Acc:HGNC:24671]	AFFY_PRIMEVIEW
1502	11727046_AT	1502.1	ENSG00000186603	HPDL	4-hydroxyphenylpyruvate dioxygenase like [Source:HGNC Symbol;Acc:HGNC:28242]	AFFY_PRIMEVIEW
1503	11727064_A_AT	1503.1	ENSG00000167522	ANKRD11	ankyrin repeat domain 11 [Source:HGNC Symbol;Acc:HGNC:21316]	AFFY_PRIMEVIEW
1504	11727065_S_AT	1504.1	ENSG00000167522	ANKRD11	ankyrin repeat domain 11 [Source:HGNC Symbol;Acc:HGNC:21316]	AFFY_PRIMEVIEW
1504	11727065_S_AT	1504.2	ENSG00000231686	Z97180.1	N/A	AFFY_PRIMEVIEW
1505	11727066_A_AT	1505.1	ENSG00000167522	ANKRD11	ankyrin repeat domain 11 [Source:HGNC Symbol;Acc:HGNC:21316]	AFFY_PRIMEVIEW
1506	11727071_AT	1506.1	ENSG00000164303	ENPP6	ectonucleotide pyrophosphatase/phosphodiesterase 6 [Source:HGNC Symbol;Acc:HGNC:23409]	AFFY_PRIMEVIEW
1507	11727073_A_AT	1507.1	ENSG00000280109	PLAC4	placenta specific 4 [Source:HGNC Symbol;Acc:HGNC:14616]	AFFY_PRIMEVIEW
1508	11727075_AT	1508.1	ENSG00000280109	PLAC4	placenta specific 4 [Source:HGNC Symbol;Acc:HGNC:14616]	AFFY_PRIMEVIEW
1509	11727079_AT	1509.1	ENSG00000083635	NUFIP1	NUFIP1, FMR1 interacting protein 1 [Source:HGNC Symbol;Acc:HGNC:8057]	AFFY_PRIMEVIEW
1510	11727099_A_AT	1510.1	ENSG00000105245	NUMBL	NUMB like, endocytic adaptor protein [Source:HGNC Symbol;Acc:HGNC:8061]	AFFY_PRIMEVIEW
1511	11727107_A_AT	1511.1	ENSG00000113360	DROSHA	drosha ribonuclease III [Source:HGNC Symbol;Acc:HGNC:17904]	AFFY_PRIMEVIEW
1512	11727108_X_AT	1512.1	ENSG00000113360	DROSHA	drosha ribonuclease III [Source:HGNC Symbol;Acc:HGNC:17904]	AFFY_PRIMEVIEW
1513	11727112_A_AT	1513.1	ENSG00000137078	SIT1	signaling threshold regulating transmembrane adaptor 1 [Source:HGNC Symbol;Acc:HGNC:17710]	AFFY_PRIMEVIEW
1514	11727113_AT	1514.1	ENSG00000138798	EGF	epidermal growth factor [Source:HGNC Symbol;Acc:HGNC:3229]	AFFY_PRIMEVIEW
1515	11727121_AT	1515.1	ENSG00000005810	MYCBP2	MYC binding protein 2, E3 ubiquitin protein ligase [Source:HGNC Symbol;Acc:HGNC:23386]	AFFY_PRIMEVIEW
1516	11727129_AT	1516.1	ENSG00000099399	MAGEB2	MAGE family member B2 [Source:HGNC Symbol;Acc:HGNC:6809]	AFFY_PRIMEVIEW
1517	11727130_A_AT	1517.1	ENSG00000108582	CPD	carboxypeptidase D [Source:HGNC Symbol;Acc:HGNC:2301]	AFFY_PRIMEVIEW
1518	11727135_A_AT	1518.1	ENSG00000129317	PUS7L	pseudouridylate synthase 7 like [Source:HGNC Symbol;Acc:HGNC:25276]	AFFY_PRIMEVIEW
1519	11727136_A_AT	1519.1	ENSG00000129317	PUS7L	pseudouridylate synthase 7 like [Source:HGNC Symbol;Acc:HGNC:25276]	AFFY_PRIMEVIEW
1520	11727167_AT	1520.1	ENSG00000128578	STRIP2	striatin interacting protein 2 [Source:HGNC Symbol;Acc:HGNC:22209]	AFFY_PRIMEVIEW
1521	11727168_A_AT	1521.1	ENSG00000128578	STRIP2	striatin interacting protein 2 [Source:HGNC Symbol;Acc:HGNC:22209]	AFFY_PRIMEVIEW
1522	11727169_X_AT	1522.1	ENSG00000196923	PDLIM7	PDZ and LIM domain 7 [Source:HGNC Symbol;Acc:HGNC:22958]	AFFY_PRIMEVIEW
1523	11727173_AT	1523.1	ENSG00000135999	EPC2	enhancer of polycomb homolog 2 [Source:HGNC Symbol;Acc:HGNC:24543]	AFFY_PRIMEVIEW
1524	11727188_AT	1524.1	ENSG00000114251	WNT5A	Wnt family member 5A [Source:HGNC Symbol;Acc:HGNC:12784]	AFFY_PRIMEVIEW
1525	11727191_A_AT	1525.1	ENSG00000125864	BFSP1	beaded filament structural protein 1 [Source:HGNC Symbol;Acc:HGNC:1040]	AFFY_PRIMEVIEW
1526	11727196_A_AT	1526.1	ENSG00000166261	ZNF202	zinc finger protein 202 [Source:HGNC Symbol;Acc:HGNC:12994]	AFFY_PRIMEVIEW
1527	11727220_AT	1527.1	ENSG00000139914	FITM1	fat storage inducing transmembrane protein 1 [Source:HGNC Symbol;Acc:HGNC:33714]	AFFY_PRIMEVIEW
1527	11727220_AT	1527.2	ENSG00000259371	AL136295.3	N/A	AFFY_PRIMEVIEW
1528	11727237_A_AT	1528.1	ENSG00000111962	UST	uronyl 2-sulfotransferase [Source:HGNC Symbol;Acc:HGNC:17223]	AFFY_PRIMEVIEW
1529	11727246_AT	1529.1	ENSG00000170175	CHRNB1	cholinergic receptor nicotinic beta 1 subunit [Source:HGNC Symbol;Acc:HGNC:1961]	AFFY_PRIMEVIEW
1530	11727261_A_AT	1530.1	ENSG00000198018	ENTPD7	ectonucleoside triphosphate diphosphohydrolase 7 [Source:HGNC Symbol;Acc:HGNC:19745]	AFFY_PRIMEVIEW
1531	11727265_A_AT	1531.1	ENSG00000214367	HAUS3	HAUS augmin like complex subunit 3 [Source:HGNC Symbol;Acc:HGNC:28719]	AFFY_PRIMEVIEW
1532	11727266_AT	1532.1	ENSG00000214367	HAUS3	HAUS augmin like complex subunit 3 [Source:HGNC Symbol;Acc:HGNC:28719]	AFFY_PRIMEVIEW
1533	11727267_A_AT	1533.1	ENSG00000184343	SRPK3	SRSF protein kinase 3 [Source:HGNC Symbol;Acc:HGNC:11402]	AFFY_PRIMEVIEW
1534	11727272_X_AT	1534.1	ENSG00000147573	TRIM55	tripartite motif containing 55 [Source:HGNC Symbol;Acc:HGNC:14215]	AFFY_PRIMEVIEW
1535	11727284_AT	1535.1	ENSG00000111249	CUX2	cut like homeobox 2 [Source:HGNC Symbol;Acc:HGNC:19347]	AFFY_PRIMEVIEW
1536	11727285_AT	1536.1	ENSG00000176160	HSF5	heat shock transcription factor 5 [Source:HGNC Symbol;Acc:HGNC:26862]	AFFY_PRIMEVIEW
1537	11727287_AT	1537.1	ENSG00000172244	C5ORF34	chromosome 5 open reading frame 34 [Source:HGNC Symbol;Acc:HGNC:24738]	AFFY_PRIMEVIEW
1538	11727304_AT	1538.1	ENSG00000173825	TIGD3	tigger transposable element derived 3 [Source:HGNC Symbol;Acc:HGNC:18334]	AFFY_PRIMEVIEW
1539	11727307_X_AT	1539.1	ENSG00000283088	AC010487.3	N/A	AFFY_PRIMEVIEW
1539	11727307_X_AT	1539.2	ENSG00000204604	ZNF468	zinc finger protein 468 [Source:HGNC Symbol;Acc:HGNC:33105]	AFFY_PRIMEVIEW
1539	11727307_X_AT	1539.3	ENSG00000182986	ZNF320	zinc finger protein 320 [Source:HGNC Symbol;Acc:HGNC:13842]	AFFY_PRIMEVIEW
1540	11727318_AT	1540.1	ENSG00000172733	PURG	purine rich element binding protein G [Source:HGNC Symbol;Acc:HGNC:17930]	AFFY_PRIMEVIEW
1541	11727321_AT	1541.1	ENSG00000183798	EMILIN3	elastin microfibril interfacer 3 [Source:HGNC Symbol;Acc:HGNC:16123]	AFFY_PRIMEVIEW
1542	11727327_X_AT	1542.1	ENSG00000185519	FAM131C	family with sequence similarity 131 member C [Source:HGNC Symbol;Acc:HGNC:26717]	AFFY_PRIMEVIEW
1543	11727340_A_AT	1543.1	ENSG00000181472	ZBTB2	zinc finger and BTB domain containing 2 [Source:HGNC Symbol;Acc:HGNC:20868]	AFFY_PRIMEVIEW
1544	11727363_A_AT	1544.1	ENSG00000160691	SHC1	SHC adaptor protein 1 [Source:HGNC Symbol;Acc:HGNC:10840]	AFFY_PRIMEVIEW
1545	11727370_AT	1545.1	ENSG00000211460	TSN	translin [Source:HGNC Symbol;Acc:HGNC:12379]	AFFY_PRIMEVIEW
1546	11727379_AT	1546.1	ENSG00000196591	HDAC2	histone deacetylase 2 [Source:HGNC Symbol;Acc:HGNC:4853]	AFFY_PRIMEVIEW
1547	11727390_A_AT	1547.1	ENSG00000157214	STEAP2	STEAP2 metalloreductase [Source:HGNC Symbol;Acc:HGNC:17885]	AFFY_PRIMEVIEW
1548	11727408_A_AT	1548.1	ENSG00000125912	NCLN	nicalin [Source:HGNC Symbol;Acc:HGNC:26923]	AFFY_PRIMEVIEW
1549	11727426_A_AT	1549.1	N/A	N/A	N/A	N/A
1550	11727431_S_AT	1550.1	ENSG00000112852	PCDHB2	protocadherin beta 2 [Source:HGNC Symbol;Acc:HGNC:8687]	AFFY_PRIMEVIEW
1550	11727431_S_AT	1550.2	ENSG00000113205	PCDHB3	protocadherin beta 3 [Source:HGNC Symbol;Acc:HGNC:8688]	AFFY_PRIMEVIEW
1551	11727451_A_AT	1551.1	ENSG00000171160	MORN4	MORN repeat containing 4 [Source:HGNC Symbol;Acc:HGNC:24001]	AFFY_PRIMEVIEW
1552	11727455_X_AT	1552.1	ENSG00000149021	SCGB1A1	secretoglobin family 1A member 1 [Source:HGNC Symbol;Acc:HGNC:12523]	AFFY_PRIMEVIEW
1553	11727460_AT	1553.1	N/A	N/A	N/A	N/A
1554	11727461_X_AT	1554.1	N/A	N/A	N/A	N/A
1555	11727470_X_AT	1555.1	ENSG00000198131	ZNF544	zinc finger protein 544 [Source:HGNC Symbol;Acc:HGNC:16759]	AFFY_PRIMEVIEW
1556	11727473_AT	1556.1	ENSG00000105205	CLC	Charcot-Leyden crystal galectin [Source:HGNC Symbol;Acc:HGNC:2014]	AFFY_PRIMEVIEW
1557	11727483_A_AT	1557.1	ENSG00000047410	TPR	translocated promoter region, nuclear basket protein [Source:HGNC Symbol;Acc:HGNC:12017]	AFFY_PRIMEVIEW
1558	11727488_S_AT	1558.1	ENSG00000235454	HAUS6P3	HAUS augmin like complex subunit 6 pseudogene 3 [Source:HGNC Symbol;Acc:HGNC:50772]	AFFY_PRIMEVIEW
1558	11727488_S_AT	1558.2	ENSG00000147874	HAUS6	HAUS augmin like complex subunit 6 [Source:HGNC Symbol;Acc:HGNC:25948]	AFFY_PRIMEVIEW
1559	11727500_AT	1559.1	ENSG00000132746	ALDH3B2	aldehyde dehydrogenase 3 family member B2 [Source:HGNC Symbol;Acc:HGNC:411]	AFFY_PRIMEVIEW
1560	11727508_S_AT	1560.1	ENSG00000105793	GTPBP10	GTP binding protein 10 [Source:HGNC Symbol;Acc:HGNC:25106]	AFFY_PRIMEVIEW
1560	11727508_S_AT	1560.2	ENSG00000157224	CLDN12	claudin 12 [Source:HGNC Symbol;Acc:HGNC:2034]	AFFY_PRIMEVIEW
1561	11727509_X_AT	1561.1	ENSG00000105793	GTPBP10	GTP binding protein 10 [Source:HGNC Symbol;Acc:HGNC:25106]	AFFY_PRIMEVIEW
1562	11727513_AT	1562.1	ENSG00000133985	TTC9	tetratricopeptide repeat domain 9 [Source:HGNC Symbol;Acc:HGNC:20267]	AFFY_PRIMEVIEW
1563	11727518_AT	1563.1	ENSG00000235961	PNMA6A	PNMA family member 6A [Source:HGNC Symbol;Acc:HGNC:28248]	AFFY_PRIMEVIEW
1564	11727524_AT	1564.1	ENSG00000183549	ACSM5	acyl-CoA synthetase medium chain family member 5 [Source:HGNC Symbol;Acc:HGNC:26060]	AFFY_PRIMEVIEW
1565	11727535_A_AT	1565.1	ENSG00000162063	CCNF	cyclin F [Source:HGNC Symbol;Acc:HGNC:1591]	AFFY_PRIMEVIEW
1566	11727536_X_AT	1566.1	ENSG00000162063	CCNF	cyclin F [Source:HGNC Symbol;Acc:HGNC:1591]	AFFY_PRIMEVIEW
1567	11727540_A_AT	1567.1	ENSG00000143493	INTS7	integrator complex subunit 7 [Source:HGNC Symbol;Acc:HGNC:24484]	AFFY_PRIMEVIEW
1568	11727556_A_AT	1568.1	ENSG00000134317	GRHL1	grainyhead like transcription factor 1 [Source:HGNC Symbol;Acc:HGNC:17923]	AFFY_PRIMEVIEW
1569	11727558_A_AT	1569.1	ENSG00000166548	TK2	thymidine kinase 2, mitochondrial [Source:HGNC Symbol;Acc:HGNC:11831]	AFFY_PRIMEVIEW
1570	11727568_AT	1570.1	ENSG00000154124	OTULIN	OTU deubiquitinase with linear linkage specificity [Source:HGNC Symbol;Acc:HGNC:25118]	AFFY_PRIMEVIEW
1571	11727579_S_AT	1571.1	ENSG00000176102	CSTF3	cleavage stimulation factor subunit 3 [Source:HGNC Symbol;Acc:HGNC:2485]	AFFY_PRIMEVIEW
1572	11727582_A_AT	1572.1	ENSG00000044524	EPHA3	EPH receptor A3 [Source:HGNC Symbol;Acc:HGNC:3387]	AFFY_PRIMEVIEW
1573	11727584_A_AT	1573.1	ENSG00000204271	SPIN3	spindlin family member 3 [Source:HGNC Symbol;Acc:HGNC:27272]	AFFY_PRIMEVIEW
1574	11727585_A_AT	1574.1	ENSG00000204271	SPIN3	spindlin family member 3 [Source:HGNC Symbol;Acc:HGNC:27272]	AFFY_PRIMEVIEW
1575	11727589_A_AT	1575.1	ENSG00000174564	IL20RB	interleukin 20 receptor subunit beta [Source:HGNC Symbol;Acc:HGNC:6004]	AFFY_PRIMEVIEW
1576	11727595_AT	1576.1	ENSG00000183354	KIAA2026	KIAA2026 [Source:HGNC Symbol;Acc:HGNC:23378]	AFFY_PRIMEVIEW
1577	11727606_AT	1577.1	ENSG00000167105	TMEM92	transmembrane protein 92 [Source:HGNC Symbol;Acc:HGNC:26579]	AFFY_PRIMEVIEW
1578	11727615_X_AT	1578.1	ENSG00000149575	SCN2B	sodium voltage-gated channel beta subunit 2 [Source:HGNC Symbol;Acc:HGNC:10589]	AFFY_PRIMEVIEW
1579	11727624_A_AT	1579.1	ENSG00000138303	ASCC1	activating signal cointegrator 1 complex subunit 1 [Source:HGNC Symbol;Acc:HGNC:24268]	AFFY_PRIMEVIEW
1580	11727625_X_AT	1580.1	ENSG00000138303	ASCC1	activating signal cointegrator 1 complex subunit 1 [Source:HGNC Symbol;Acc:HGNC:24268]	AFFY_PRIMEVIEW
1581	11727632_AT	1581.1	ENSG00000112394	SLC16A10	solute carrier family 16 member 10 [Source:HGNC Symbol;Acc:HGNC:17027]	AFFY_PRIMEVIEW
1582	11727635_A_AT	1582.1	ENSG00000114204	SERPINI2	serpin family I member 2 [Source:HGNC Symbol;Acc:HGNC:8945]	AFFY_PRIMEVIEW
1583	11727650_A_AT	1583.1	ENSG00000169026	SLC49A3	solute carrier family 49 member 3 [Source:HGNC Symbol;Acc:HGNC:26177]	AFFY_PRIMEVIEW
1584	11727651_AT	1584.1	ENSG00000139767	SRRM4	serine/arginine repetitive matrix 4 [Source:HGNC Symbol;Acc:HGNC:29389]	AFFY_PRIMEVIEW
1585	11727654_AT	1585.1	ENSG00000139767	SRRM4	serine/arginine repetitive matrix 4 [Source:HGNC Symbol;Acc:HGNC:29389]	AFFY_PRIMEVIEW
1586	11727655_S_AT	1586.1	ENSG00000151914	DST	dystonin [Source:HGNC Symbol;Acc:HGNC:1090]	AFFY_PRIMEVIEW
1587	11727656_S_AT	1587.1	ENSG00000154928	EPHB1	EPH receptor B1 [Source:HGNC Symbol;Acc:HGNC:3392]	AFFY_PRIMEVIEW
1588	11727659_A_AT	1588.1	ENSG00000129451	KLK10	kallikrein related peptidase 10 [Source:HGNC Symbol;Acc:HGNC:6358]	AFFY_PRIMEVIEW
1589	11727663_A_AT	1589.1	ENSG00000165730	STOX1	storkhead box 1 [Source:HGNC Symbol;Acc:HGNC:23508]	AFFY_PRIMEVIEW
1590	11727664_X_AT	1590.1	ENSG00000165730	STOX1	storkhead box 1 [Source:HGNC Symbol;Acc:HGNC:23508]	AFFY_PRIMEVIEW
1591	11727667_AT	1591.1	ENSG00000118997	DNAH7	dynein axonemal heavy chain 7 [Source:HGNC Symbol;Acc:HGNC:18661]	AFFY_PRIMEVIEW
1592	11727675_AT	1592.1	ENSG00000075643	MOCOS	molybdenum cofactor sulfurase [Source:HGNC Symbol;Acc:HGNC:18234]	AFFY_PRIMEVIEW
1593	11727677_AT	1593.1	ENSG00000189114	BLOC1S3	biogenesis of lysosomal organelles complex 1 subunit 3 [Source:HGNC Symbol;Acc:HGNC:20914]	AFFY_PRIMEVIEW
1594	11727683_A_AT	1594.1	ENSG00000103723	AP3B2	adaptor related protein complex 3 subunit beta 2 [Source:HGNC Symbol;Acc:HGNC:567]	AFFY_PRIMEVIEW
1595	11727684_AT	1595.1	ENSG00000140538	NTRK3	neurotrophic receptor tyrosine kinase 3 [Source:HGNC Symbol;Acc:HGNC:8033]	AFFY_PRIMEVIEW
1596	11727696_X_AT	1596.1	ENSG00000114026	OGG1	8-oxoguanine DNA glycosylase [Source:HGNC Symbol;Acc:HGNC:8125]	AFFY_PRIMEVIEW
1597	11727698_A_AT	1597.1	ENSG00000182853	VMO1	vitelline membrane outer layer 1 homolog [Source:HGNC Symbol;Acc:HGNC:30387]	AFFY_PRIMEVIEW
1598	11727699_AT	1598.1	ENSG00000140534	TICRR	TOPBP1 interacting checkpoint and replication regulator [Source:HGNC Symbol;Acc:HGNC:28704]	AFFY_PRIMEVIEW
1599	11727705_A_AT	1599.1	ENSG00000161973	CCDC42	coiled-coil domain containing 42 [Source:HGNC Symbol;Acc:HGNC:26528]	AFFY_PRIMEVIEW
1600	11727717_AT	1600.1	ENSG00000179627	ZBTB42	zinc finger and BTB domain containing 42 [Source:HGNC Symbol;Acc:HGNC:32550]	AFFY_PRIMEVIEW
1601	11727750_A_AT	1601.1	ENSG00000116833	NR5A2	nuclear receptor subfamily 5 group A member 2 [Source:HGNC Symbol;Acc:HGNC:7984]	AFFY_PRIMEVIEW
1602	11727755_A_AT	1602.1	ENSG00000161914	ZNF653	zinc finger protein 653 [Source:HGNC Symbol;Acc:HGNC:25196]	AFFY_PRIMEVIEW
1603	11727759_A_AT	1603.1	ENSG00000205279	CTXN3	cortexin 3 [Source:HGNC Symbol;Acc:HGNC:31110]	AFFY_PRIMEVIEW
1604	11727760_S_AT	1604.1	ENSG00000205279	CTXN3	cortexin 3 [Source:HGNC Symbol;Acc:HGNC:31110]	AFFY_PRIMEVIEW
1605	11727795_X_AT	1605.1	ENSG00000104408	EIF3E	eukaryotic translation initiation factor 3 subunit E [Source:HGNC Symbol;Acc:HGNC:3277]	AFFY_PRIMEVIEW
1605	11727795_X_AT	1605.2	ENSG00000277998	AC107075.1	N/A	AFFY_PRIMEVIEW
1606	11727805_A_AT	1606.1	ENSG00000104343	UBE2W	ubiquitin conjugating enzyme E2 W [Source:HGNC Symbol;Acc:HGNC:25616]	AFFY_PRIMEVIEW
1607	11727806_S_AT	1607.1	ENSG00000104343	UBE2W	ubiquitin conjugating enzyme E2 W [Source:HGNC Symbol;Acc:HGNC:25616]	AFFY_PRIMEVIEW
1608	11727812_S_AT	1608.1	ENSG00000136450	SRSF1	serine and arginine rich splicing factor 1 [Source:HGNC Symbol;Acc:HGNC:10780]	AFFY_PRIMEVIEW
1609	11727815_AT	1609.1	ENSG00000154127	UBASH3B	ubiquitin associated and SH3 domain containing B [Source:HGNC Symbol;Acc:HGNC:29884]	AFFY_PRIMEVIEW
1610	11727827_X_AT	1610.1	ENSG00000003509	NDUFAF7	NADH:ubiquinone oxidoreductase complex assembly factor 7 [Source:HGNC Symbol;Acc:HGNC:28816]	AFFY_PRIMEVIEW
1611	11727833_AT	1611.1	ENSG00000163811	WDR43	WD repeat domain 43 [Source:HGNC Symbol;Acc:HGNC:28945]	AFFY_PRIMEVIEW
1612	11727834_AT	1612.1	ENSG00000163811	WDR43	WD repeat domain 43 [Source:HGNC Symbol;Acc:HGNC:28945]	AFFY_PRIMEVIEW
1613	11727837_AT	1613.1	ENSG00000091651	ORC6	origin recognition complex subunit 6 [Source:HGNC Symbol;Acc:HGNC:17151]	AFFY_PRIMEVIEW
1614	11727844_A_AT	1614.1	ENSG00000205426	KRT81	keratin 81 [Source:HGNC Symbol;Acc:HGNC:6458]	AFFY_PRIMEVIEW
1615	11727850_X_AT	1615.1	ENSG00000132603	NIP7	NIP7, nucleolar pre-rRNA processing protein [Source:HGNC Symbol;Acc:HGNC:24328]	AFFY_PRIMEVIEW
1616	11727854_S_AT	1616.1	ENSG00000093000	NUP50	nucleoporin 50 [Source:HGNC Symbol;Acc:HGNC:8065]	AFFY_PRIMEVIEW
1617	11727868_A_AT	1617.1	ENSG00000156958	GALK2	galactokinase 2 [Source:HGNC Symbol;Acc:HGNC:4119]	AFFY_PRIMEVIEW
1618	11727880_A_AT	1618.1	ENSG00000167670	CHAF1A	chromatin assembly factor 1 subunit A [Source:HGNC Symbol;Acc:HGNC:1910]	AFFY_PRIMEVIEW
1619	11727906_AT	1619.1	ENSG00000166670	MMP10	matrix metallopeptidase 10 [Source:HGNC Symbol;Acc:HGNC:7156]	AFFY_PRIMEVIEW
1620	11727909_AT	1620.1	ENSG00000165349	SLC7A3	solute carrier family 7 member 3 [Source:HGNC Symbol;Acc:HGNC:11061]	AFFY_PRIMEVIEW
1621	11727919_A_AT	1621.1	N/A	N/A	N/A	N/A
1622	11727921_A_AT	1622.1	ENSG00000167858	TEKT1	tektin 1 [Source:HGNC Symbol;Acc:HGNC:15534]	AFFY_PRIMEVIEW
1623	11727933_AT	1623.1	ENSG00000151532	VTI1A	vesicle transport through interaction with t-SNAREs 1A [Source:HGNC Symbol;Acc:HGNC:17792]	AFFY_PRIMEVIEW
1624	11727941_A_AT	1624.1	ENSG00000154920	EME1	essential meiotic structure-specific endonuclease 1 [Source:HGNC Symbol;Acc:HGNC:24965]	AFFY_PRIMEVIEW
1625	11727944_A_AT	1625.1	ENSG00000241484	ARHGAP8	Rho GTPase activating protein 8 [Source:HGNC Symbol;Acc:HGNC:677]	AFFY_PRIMEVIEW
1625	11727944_A_AT	1625.2	ENSG00000248405	PRR5-ARHGAP8	PRR5-ARHGAP8 readthrough [Source:HGNC Symbol;Acc:HGNC:34512]	AFFY_PRIMEVIEW
1626	11727954_AT	1626.1	ENSG00000179364	PACS2	phosphofurin acidic cluster sorting protein 2 [Source:HGNC Symbol;Acc:HGNC:23794]	AFFY_PRIMEVIEW
1627	11727962_X_AT	1627.1	ENSG00000153487	ING1	inhibitor of growth family member 1 [Source:HGNC Symbol;Acc:HGNC:6062]	AFFY_PRIMEVIEW
1628	11727973_A_AT	1628.1	ENSG00000166451	CENPN	centromere protein N [Source:HGNC Symbol;Acc:HGNC:30873]	AFFY_PRIMEVIEW
1629	11727975_A_AT	1629.1	ENSG00000118514	ALDH8A1	aldehyde dehydrogenase 8 family member A1 [Source:HGNC Symbol;Acc:HGNC:15471]	AFFY_PRIMEVIEW
1630	11727977_A_AT	1630.1	ENSG00000196935	SRGAP1	SLIT-ROBO Rho GTPase activating protein 1 [Source:HGNC Symbol;Acc:HGNC:17382]	AFFY_PRIMEVIEW
1631	11727978_AT	1631.1	ENSG00000196935	SRGAP1	SLIT-ROBO Rho GTPase activating protein 1 [Source:HGNC Symbol;Acc:HGNC:17382]	AFFY_PRIMEVIEW
1632	11728000_A_AT	1632.1	ENSG00000223802	CERS1	ceramide synthase 1 [Source:HGNC Symbol;Acc:HGNC:14253]	AFFY_PRIMEVIEW
1633	11728036_A_AT	1633.1	ENSG00000166091	CMTM5	CKLF like MARVEL transmembrane domain containing 5 [Source:HGNC Symbol;Acc:HGNC:19176]	AFFY_PRIMEVIEW
1634	11728045_AT	1634.1	ENSG00000221990	EXOC3-AS1	EXOC3 antisense RNA 1 [Source:HGNC Symbol;Acc:HGNC:25175]	AFFY_PRIMEVIEW
1635	11728071_A_AT	1635.1	ENSG00000146918	NCAPG2	non-SMC condensin II complex subunit G2 [Source:HGNC Symbol;Acc:HGNC:21904]	AFFY_PRIMEVIEW
1636	11728073_A_AT	1636.1	ENSG00000148841	ITPRIP	inositol 1,4,5-trisphosphate receptor interacting protein [Source:HGNC Symbol;Acc:HGNC:29370]	AFFY_PRIMEVIEW
1637	11728074_A_AT	1637.1	ENSG00000178385	PLEKHM3	pleckstrin homology domain containing M3 [Source:HGNC Symbol;Acc:HGNC:34006]	AFFY_PRIMEVIEW
1638	11728075_AT	1638.1	ENSG00000178385	PLEKHM3	pleckstrin homology domain containing M3 [Source:HGNC Symbol;Acc:HGNC:34006]	AFFY_PRIMEVIEW
1639	11728082_S_AT	1639.1	ENSG00000225968	ELFN1	extracellular leucine rich repeat and fibronectin type III domain containing 1 [Source:HGNC Symbol;Acc:HGNC:33154]	AFFY_PRIMEVIEW
1640	11728089_A_AT	1640.1	ENSG00000155011	DKK2	dickkopf WNT signaling pathway inhibitor 2 [Source:HGNC Symbol;Acc:HGNC:2892]	AFFY_PRIMEVIEW
1641	11728097_A_AT	1641.1	ENSG00000058453	CROCC	ciliary rootlet coiled-coil, rootletin [Source:HGNC Symbol;Acc:HGNC:21299]	AFFY_PRIMEVIEW
1642	11728098_X_AT	1642.1	ENSG00000058453	CROCC	ciliary rootlet coiled-coil, rootletin [Source:HGNC Symbol;Acc:HGNC:21299]	AFFY_PRIMEVIEW
1643	11728105_X_AT	1643.1	ENSG00000160183	TMPRSS3	transmembrane serine protease 3 [Source:HGNC Symbol;Acc:HGNC:11877]	AFFY_PRIMEVIEW
1644	11728106_A_AT	1644.1	ENSG00000160183	TMPRSS3	transmembrane serine protease 3 [Source:HGNC Symbol;Acc:HGNC:11877]	AFFY_PRIMEVIEW
1645	11728114_A_AT	1645.1	ENSG00000085644	ZNF213	zinc finger protein 213 [Source:HGNC Symbol;Acc:HGNC:13005]	AFFY_PRIMEVIEW
1646	11728116_AT	1646.1	ENSG00000197653	DNAH10	dynein axonemal heavy chain 10 [Source:HGNC Symbol;Acc:HGNC:2941]	AFFY_PRIMEVIEW
1647	11728118_AT	1647.1	ENSG00000205436	EXOC3L4	exocyst complex component 3 like 4 [Source:HGNC Symbol;Acc:HGNC:20120]	AFFY_PRIMEVIEW
1648	11728130_A_AT	1648.1	ENSG00000164818	DNAAF5	dynein axonemal assembly factor 5 [Source:HGNC Symbol;Acc:HGNC:26013]	AFFY_PRIMEVIEW
1649	11728139_A_AT	1649.1	ENSG00000160323	ADAMTS13	ADAM metallopeptidase with thrombospondin type 1 motif 13 [Source:HGNC Symbol;Acc:HGNC:1366]	AFFY_PRIMEVIEW
1650	11728141_AT	1650.1	ENSG00000180730	SHISA2	shisa family member 2 [Source:HGNC Symbol;Acc:HGNC:20366]	AFFY_PRIMEVIEW
1651	11728144_X_AT	1651.1	ENSG00000160404	TOR2A	torsin family 2 member A [Source:HGNC Symbol;Acc:HGNC:11996]	AFFY_PRIMEVIEW
1652	11728162_AT	1652.1	ENSG00000132692	BCAN	brevican [Source:HGNC Symbol;Acc:HGNC:23059]	AFFY_PRIMEVIEW
1653	11728186_AT	1653.1	ENSG00000182747	SLC35D3	solute carrier family 35 member D3 [Source:HGNC Symbol;Acc:HGNC:15621]	AFFY_PRIMEVIEW
1654	11728187_AT	1654.1	ENSG00000182747	SLC35D3	solute carrier family 35 member D3 [Source:HGNC Symbol;Acc:HGNC:15621]	AFFY_PRIMEVIEW
1655	11728202_A_AT	1655.1	ENSG00000067334	DNTTIP2	deoxynucleotidyltransferase terminal interacting protein 2 [Source:HGNC Symbol;Acc:HGNC:24013]	AFFY_PRIMEVIEW
1656	11728209_A_AT	1656.1	ENSG00000074211	PPP2R2C	protein phosphatase 2 regulatory subunit Bgamma [Source:HGNC Symbol;Acc:HGNC:9306]	AFFY_PRIMEVIEW
1657	11728221_AT	1657.1	ENSG00000175352	NRIP3	nuclear receptor interacting protein 3 [Source:HGNC Symbol;Acc:HGNC:1167]	AFFY_PRIMEVIEW
1658	11728227_A_AT	1658.1	ENSG00000196998	WDR45	WD repeat domain 45 [Source:HGNC Symbol;Acc:HGNC:28912]	AFFY_PRIMEVIEW
1659	11728238_X_AT	1659.1	ENSG00000157106	SMG1	SMG1, nonsense mediated mRNA decay associated PI3K related kinase [Source:HGNC Symbol;Acc:HGNC:30045]	AFFY_PRIMEVIEW
1660	11728259_A_AT	1660.1	ENSG00000117597	UTP25	UTP25, small subunit processor component [Source:HGNC Symbol;Acc:HGNC:28440]	AFFY_PRIMEVIEW
1661	11728262_A_AT	1661.1	ENSG00000007392	LUC7L	LUC7 like [Source:HGNC Symbol;Acc:HGNC:6723]	AFFY_PRIMEVIEW
1662	11728278_AT	1662.1	ENSG00000123739	PLA2G12A	phospholipase A2 group XIIA [Source:HGNC Symbol;Acc:HGNC:18554]	AFFY_PRIMEVIEW
1663	11728282_AT	1663.1	ENSG00000076067	RBMS2	RNA binding motif single stranded interacting protein 2 [Source:HGNC Symbol;Acc:HGNC:9909]	AFFY_PRIMEVIEW
1664	11728284_X_AT	1664.1	ENSG00000076067	RBMS2	RNA binding motif single stranded interacting protein 2 [Source:HGNC Symbol;Acc:HGNC:9909]	AFFY_PRIMEVIEW
1665	11728322_A_AT	1665.1	ENSG00000085999	RAD54L	RAD54 like [Source:HGNC Symbol;Acc:HGNC:9826]	AFFY_PRIMEVIEW
1666	11728324_AT	1666.1	ENSG00000188386	PPP3R2	protein phosphatase 3 regulatory subunit B, beta [Source:HGNC Symbol;Acc:HGNC:9318]	AFFY_PRIMEVIEW
1667	11728329_A_AT	1667.1	ENSG00000012211	PRICKLE3	prickle planar cell polarity protein 3 [Source:HGNC Symbol;Acc:HGNC:6645]	AFFY_PRIMEVIEW
1668	11728333_A_AT	1668.1	ENSG00000105656	ELL	elongation factor for RNA polymerase II [Source:HGNC Symbol;Acc:HGNC:23114]	AFFY_PRIMEVIEW
1669	11728364_A_AT	1669.1	ENSG00000016402	IL20RA	interleukin 20 receptor subunit alpha [Source:HGNC Symbol;Acc:HGNC:6003]	AFFY_PRIMEVIEW
1670	11728371_A_AT	1670.1	ENSG00000116138	DNAJC16	DnaJ heat shock protein family (Hsp40) member C16 [Source:HGNC Symbol;Acc:HGNC:29157]	AFFY_PRIMEVIEW
1671	11728372_A_AT	1671.1	ENSG00000116138	DNAJC16	DnaJ heat shock protein family (Hsp40) member C16 [Source:HGNC Symbol;Acc:HGNC:29157]	AFFY_PRIMEVIEW
1672	11728379_AT	1672.1	ENSG00000203666	EFCAB2	EF-hand calcium binding domain 2 [Source:HGNC Symbol;Acc:HGNC:28166]	AFFY_PRIMEVIEW
1673	11728387_A_AT	1673.1	ENSG00000197140	ADAM32	ADAM metallopeptidase domain 32 [Source:HGNC Symbol;Acc:HGNC:15479]	AFFY_PRIMEVIEW
1674	11728420_A_AT	1674.1	ENSG00000100147	CCDC134	coiled-coil domain containing 134 [Source:HGNC Symbol;Acc:HGNC:26185]	AFFY_PRIMEVIEW
1675	11728423_A_AT	1675.1	ENSG00000085514	PILRA	paired immunoglobin like type 2 receptor alpha [Source:HGNC Symbol;Acc:HGNC:20396]	AFFY_PRIMEVIEW
1676	11728424_X_AT	1676.1	ENSG00000085514	PILRA	paired immunoglobin like type 2 receptor alpha [Source:HGNC Symbol;Acc:HGNC:20396]	AFFY_PRIMEVIEW
1677	11728426_S_AT	1677.1	ENSG00000065060	UHRF1BP1	UHRF1 binding protein 1 [Source:HGNC Symbol;Acc:HGNC:21216]	AFFY_PRIMEVIEW
1678	11728429_A_AT	1678.1	ENSG00000196233	LCOR	ligand dependent nuclear receptor corepressor [Source:HGNC Symbol;Acc:HGNC:29503]	AFFY_PRIMEVIEW
1679	11728436_AT	1679.1	ENSG00000185658	BRWD1	bromodomain and WD repeat domain containing 1 [Source:HGNC Symbol;Acc:HGNC:12760]	AFFY_PRIMEVIEW
1680	11728441_S_AT	1680.1	ENSG00000116254	CHD5	chromodomain helicase DNA binding protein 5 [Source:HGNC Symbol;Acc:HGNC:16816]	AFFY_PRIMEVIEW
1681	11728444_A_AT	1681.1	ENSG00000160551	TAOK1	TAO kinase 1 [Source:HGNC Symbol;Acc:HGNC:29259]	AFFY_PRIMEVIEW
1682	11728446_A_AT	1682.1	ENSG00000114805	PLCH1	phospholipase C eta 1 [Source:HGNC Symbol;Acc:HGNC:29185]	AFFY_PRIMEVIEW
1683	11728447_AT	1683.1	ENSG00000265817	FSBP	fibrinogen silencer binding protein [Source:HGNC Symbol;Acc:HGNC:43653]	AFFY_PRIMEVIEW
1683	11728447_AT	1683.2	ENSG00000197275	RAD54B	RAD54 homolog B [Source:HGNC Symbol;Acc:HGNC:17228]	AFFY_PRIMEVIEW
1684	11728448_A_AT	1684.1	ENSG00000173137	ADCK5	aarF domain containing kinase 5 [Source:HGNC Symbol;Acc:HGNC:21738]	AFFY_PRIMEVIEW
1685	11728454_S_AT	1685.1	ENSG00000088387	DOCK9	dedicator of cytokinesis 9 [Source:HGNC Symbol;Acc:HGNC:14132]	AFFY_PRIMEVIEW
1686	11728475_AT	1686.1	N/A	N/A	N/A	N/A
1687	11728476_A_AT	1687.1	ENSG00000163734	CXCL3	C-X-C motif chemokine ligand 3 [Source:HGNC Symbol;Acc:HGNC:4604]	AFFY_PRIMEVIEW
1688	11728485_X_AT	1688.1	ENSG00000144791	LIMD1	LIM domains containing 1 [Source:HGNC Symbol;Acc:HGNC:6612]	AFFY_PRIMEVIEW
1689	11728502_A_AT	1689.1	ENSG00000167850	CD300C	CD300c molecule [Source:HGNC Symbol;Acc:HGNC:19320]	AFFY_PRIMEVIEW
1690	11728505_AT	1690.1	ENSG00000171443	ZNF524	zinc finger protein 524 [Source:HGNC Symbol;Acc:HGNC:28322]	AFFY_PRIMEVIEW
1691	11728510_X_AT	1691.1	ENSG00000106692	FKTN	fukutin [Source:HGNC Symbol;Acc:HGNC:3622]	AFFY_PRIMEVIEW
1692	11728514_A_AT	1692.1	ENSG00000156170	NDUFAF6	NADH:ubiquinone oxidoreductase complex assembly factor 6 [Source:HGNC Symbol;Acc:HGNC:28625]	AFFY_PRIMEVIEW
1693	11728519_A_AT	1693.1	ENSG00000196152	ZNF79	zinc finger protein 79 [Source:HGNC Symbol;Acc:HGNC:13153]	AFFY_PRIMEVIEW
1694	11728534_A_AT	1694.1	ENSG00000111671	SPSB2	splA/ryanodine receptor domain and SOCS box containing 2 [Source:HGNC Symbol;Acc:HGNC:29522]	AFFY_PRIMEVIEW
1695	11728541_S_AT	1695.1	ENSG00000112139	MDGA1	MAM domain containing glycosylphosphatidylinositol anchor 1 [Source:HGNC Symbol;Acc:HGNC:19267]	AFFY_PRIMEVIEW
1696	11728542_X_AT	1696.1	ENSG00000134042	MRO	maestro [Source:HGNC Symbol;Acc:HGNC:24121]	AFFY_PRIMEVIEW
1697	11728543_A_AT	1697.1	ENSG00000134042	MRO	maestro [Source:HGNC Symbol;Acc:HGNC:24121]	AFFY_PRIMEVIEW
1698	11728544_A_AT	1698.1	ENSG00000115593	SMYD1	SET and MYND domain containing 1 [Source:HGNC Symbol;Acc:HGNC:20986]	AFFY_PRIMEVIEW
1699	11728554_AT	1699.1	ENSG00000250565	ATP6V1E2	ATPase H+ transporting V1 subunit E2 [Source:HGNC Symbol;Acc:HGNC:18125]	AFFY_PRIMEVIEW
1700	11728561_A_AT	1700.1	ENSG00000102904	TSNAXIP1	translin associated factor X interacting protein 1 [Source:HGNC Symbol;Acc:HGNC:18586]	AFFY_PRIMEVIEW
1701	11728577_A_AT	1701.1	ENSG00000183186	C2CD4C	C2 calcium dependent domain containing 4C [Source:HGNC Symbol;Acc:HGNC:29417]	AFFY_PRIMEVIEW
1702	11728581_AT	1702.1	ENSG00000174586	ZNF497	zinc finger protein 497 [Source:HGNC Symbol;Acc:HGNC:23714]	AFFY_PRIMEVIEW
1703	11728583_S_AT	1703.1	ENSG00000203989	RHOXF2B	Rhox homeobox family member 2B [Source:HGNC Symbol;Acc:HGNC:33519]	AFFY_PRIMEVIEW
1703	11728583_S_AT	1703.2	ENSG00000131721	RHOXF2	Rhox homeobox family member 2 [Source:HGNC Symbol;Acc:HGNC:30011]	AFFY_PRIMEVIEW
1704	11728588_AT	1704.1	ENSG00000138111	MFSD13A	major facilitator superfamily domain containing 13A [Source:HGNC Symbol;Acc:HGNC:26196]	AFFY_PRIMEVIEW
1705	11728589_X_AT	1705.1	ENSG00000138111	MFSD13A	major facilitator superfamily domain containing 13A [Source:HGNC Symbol;Acc:HGNC:26196]	AFFY_PRIMEVIEW
1706	11728590_A_AT	1706.1	ENSG00000138111	MFSD13A	major facilitator superfamily domain containing 13A [Source:HGNC Symbol;Acc:HGNC:26196]	AFFY_PRIMEVIEW
1707	11728600_AT	1707.1	ENSG00000138161	CUZD1	CUB and zona pellucida like domains 1 [Source:HGNC Symbol;Acc:HGNC:17937]	AFFY_PRIMEVIEW
1707	11728600_AT	1707.2	ENSG00000213185	FAM24B	family with sequence similarity 24 member B [Source:HGNC Symbol;Acc:HGNC:23475]	AFFY_PRIMEVIEW
1708	11728612_AT	1708.1	ENSG00000049192	ADAMTS6	ADAM metallopeptidase with thrombospondin type 1 motif 6 [Source:HGNC Symbol;Acc:HGNC:222]	AFFY_PRIMEVIEW
1709	11728623_A_AT	1709.1	ENSG00000075891	PAX2	paired box 2 [Source:HGNC Symbol;Acc:HGNC:8616]	AFFY_PRIMEVIEW
1710	11728628_X_AT	1710.1	ENSG00000126733	DACH2	dachshund family transcription factor 2 [Source:HGNC Symbol;Acc:HGNC:16814]	AFFY_PRIMEVIEW
1711	11728630_AT	1711.1	ENSG00000104808	DHDH	dihydrodiol dehydrogenase [Source:HGNC Symbol;Acc:HGNC:17887]	AFFY_PRIMEVIEW
1712	11728638_AT	1712.1	ENSG00000187758	ADH1A	alcohol dehydrogenase 1A (class I), alpha polypeptide [Source:HGNC Symbol;Acc:HGNC:249]	AFFY_PRIMEVIEW
1713	11728639_X_AT	1713.1	ENSG00000187758	ADH1A	alcohol dehydrogenase 1A (class I), alpha polypeptide [Source:HGNC Symbol;Acc:HGNC:249]	AFFY_PRIMEVIEW
1714	11728646_AT	1714.1	ENSG00000069275	NUCKS1	nuclear casein kinase and cyclin dependent kinase substrate 1 [Source:HGNC Symbol;Acc:HGNC:29923]	AFFY_PRIMEVIEW
1715	11728671_S_AT	1715.1	ENSG00000186591	UBE2H	ubiquitin conjugating enzyme E2 H [Source:HGNC Symbol;Acc:HGNC:12484]	AFFY_PRIMEVIEW
1715	11728671_S_AT	1715.2	ENSG00000253677	UBE2HP1	ubiquitin conjugating enzyme E2 H pseudogene 1 [Source:HGNC Symbol;Acc:HGNC:31079]	AFFY_PRIMEVIEW
1716	11728680_S_AT	1716.1	ENSG00000172239	PAIP1	poly(A) binding protein interacting protein 1 [Source:HGNC Symbol;Acc:HGNC:16945]	AFFY_PRIMEVIEW
1717	11728695_AT	1717.1	ENSG00000081181	ARG2	arginase 2 [Source:HGNC Symbol;Acc:HGNC:664]	AFFY_PRIMEVIEW
1718	11728710_A_AT	1718.1	ENSG00000284541	MIR4517	microRNA 4517 [Source:HGNC Symbol;Acc:HGNC:41878]	AFFY_PRIMEVIEW
1718	11728710_A_AT	1718.2	ENSG00000176953	NFATC2IP	nuclear factor of activated T cells 2 interacting protein [Source:HGNC Symbol;Acc:HGNC:25906]	AFFY_PRIMEVIEW
1719	11728711_A_AT	1719.1	ENSG00000176953	NFATC2IP	nuclear factor of activated T cells 2 interacting protein [Source:HGNC Symbol;Acc:HGNC:25906]	AFFY_PRIMEVIEW
1720	11728716_X_AT	1720.1	ENSG00000163735	CXCL5	C-X-C motif chemokine ligand 5 [Source:HGNC Symbol;Acc:HGNC:10642]	AFFY_PRIMEVIEW
1721	11728730_AT	1721.1	ENSG00000136982	DSCC1	DNA replication and sister chromatid cohesion 1 [Source:HGNC Symbol;Acc:HGNC:24453]	AFFY_PRIMEVIEW
1722	11728731_S_AT	1722.1	ENSG00000136982	DSCC1	DNA replication and sister chromatid cohesion 1 [Source:HGNC Symbol;Acc:HGNC:24453]	AFFY_PRIMEVIEW
1723	11728737_A_AT	1723.1	ENSG00000106341	PPP1R17	protein phosphatase 1 regulatory subunit 17 [Source:HGNC Symbol;Acc:HGNC:16973]	AFFY_PRIMEVIEW
1724	11728740_A_AT	1724.1	ENSG00000125875	TBC1D20	TBC1 domain family member 20 [Source:HGNC Symbol;Acc:HGNC:16133]	AFFY_PRIMEVIEW
1725	11728754_AT	1725.1	ENSG00000182459	TEX19	testis expressed 19 [Source:HGNC Symbol;Acc:HGNC:33802]	AFFY_PRIMEVIEW
1726	11728779_A_AT	1726.1	ENSG00000115085	ZAP70	zeta chain of T cell receptor associated protein kinase 70 [Source:HGNC Symbol;Acc:HGNC:12858]	AFFY_PRIMEVIEW
1727	11728796_X_AT	1727.1	ENSG00000257103	LSM14A	LSM14A, mRNA processing body assembly factor [Source:HGNC Symbol;Acc:HGNC:24489]	AFFY_PRIMEVIEW
1728	11728797_A_AT	1728.1	ENSG00000257103	LSM14A	LSM14A, mRNA processing body assembly factor [Source:HGNC Symbol;Acc:HGNC:24489]	AFFY_PRIMEVIEW
1729	11728804_A_AT	1729.1	ENSG00000172766	NAA16	N(alpha)-acetyltransferase 16, NatA auxiliary subunit [Source:HGNC Symbol;Acc:HGNC:26164]	AFFY_PRIMEVIEW
1730	11728807_AT	1730.1	ENSG00000124523	SIRT5	sirtuin 5 [Source:HGNC Symbol;Acc:HGNC:14933]	AFFY_PRIMEVIEW
1731	11728809_A_AT	1731.1	ENSG00000144810	COL8A1	collagen type VIII alpha 1 chain [Source:HGNC Symbol;Acc:HGNC:2215]	AFFY_PRIMEVIEW
1732	11728812_AT	1732.1	ENSG00000264522	OTUD7B	OTU deubiquitinase 7B [Source:HGNC Symbol;Acc:HGNC:16683]	AFFY_PRIMEVIEW
1733	11728813_AT	1733.1	ENSG00000264522	OTUD7B	OTU deubiquitinase 7B [Source:HGNC Symbol;Acc:HGNC:16683]	AFFY_PRIMEVIEW
1734	11728817_X_AT	1734.1	ENSG00000048028	USP28	ubiquitin specific peptidase 28 [Source:HGNC Symbol;Acc:HGNC:12625]	AFFY_PRIMEVIEW
1735	11728825_AT	1735.1	ENSG00000253368	TRNP1	TMF1-regulated nuclear protein 1 [Source:HGNC Symbol;Acc:HGNC:34348]	AFFY_PRIMEVIEW
1736	11728826_S_AT	1736.1	ENSG00000253368	TRNP1	TMF1-regulated nuclear protein 1 [Source:HGNC Symbol;Acc:HGNC:34348]	AFFY_PRIMEVIEW
1737	11728831_A_AT	1737.1	ENSG00000127328	RAB3IP	RAB3A interacting protein [Source:HGNC Symbol;Acc:HGNC:16508]	AFFY_PRIMEVIEW
1738	11728835_A_AT	1738.1	ENSG00000174842	GLMN	glomulin, FKBP associated protein [Source:HGNC Symbol;Acc:HGNC:14373]	AFFY_PRIMEVIEW
1739	11728843_A_AT	1739.1	ENSG00000148426	PROSER2	proline and serine rich 2 [Source:HGNC Symbol;Acc:HGNC:23728]	AFFY_PRIMEVIEW
1740	11728844_AT	1740.1	ENSG00000148426	PROSER2	proline and serine rich 2 [Source:HGNC Symbol;Acc:HGNC:23728]	AFFY_PRIMEVIEW
1741	11728847_A_AT	1741.1	ENSG00000189350	TOGARAM2	TOG array regulator of axonemal microtubules 2 [Source:HGNC Symbol;Acc:HGNC:33715]	AFFY_PRIMEVIEW
1742	11728854_AT	1742.1	ENSG00000154479	CCDC173	coiled-coil domain containing 173 [Source:HGNC Symbol;Acc:HGNC:25064]	AFFY_PRIMEVIEW
1743	11728856_AT	1743.1	ENSG00000261678	SCRT1	scratch family transcriptional repressor 1 [Source:HGNC Symbol;Acc:HGNC:15950]	AFFY_PRIMEVIEW
1744	11728863_AT	1744.1	ENSG00000101003	GINS1	GINS complex subunit 1 [Source:HGNC Symbol;Acc:HGNC:28980]	AFFY_PRIMEVIEW
1745	11728865_AT	1745.1	ENSG00000165724	ZMYND19	zinc finger MYND-type containing 19 [Source:HGNC Symbol;Acc:HGNC:21146]	AFFY_PRIMEVIEW
1746	11728868_AT	1746.1	ENSG00000196361	ELAVL3	ELAV like RNA binding protein 3 [Source:HGNC Symbol;Acc:HGNC:3314]	AFFY_PRIMEVIEW
1747	11728870_AT	1747.1	ENSG00000196361	ELAVL3	ELAV like RNA binding protein 3 [Source:HGNC Symbol;Acc:HGNC:3314]	AFFY_PRIMEVIEW
1748	11728871_AT	1748.1	ENSG00000196361	ELAVL3	ELAV like RNA binding protein 3 [Source:HGNC Symbol;Acc:HGNC:3314]	AFFY_PRIMEVIEW
1749	11728875_X_AT	1749.1	ENSG00000183814	LIN9	lin-9 DREAM MuvB core complex component [Source:HGNC Symbol;Acc:HGNC:30830]	AFFY_PRIMEVIEW
1750	11728878_S_AT	1750.1	ENSG00000049618	ARID1B	AT-rich interaction domain 1B [Source:HGNC Symbol;Acc:HGNC:18040]	AFFY_PRIMEVIEW
1751	11728892_AT	1751.1	ENSG00000171368	TPPP	tubulin polymerization promoting protein [Source:HGNC Symbol;Acc:HGNC:24164]	AFFY_PRIMEVIEW
1752	11728896_A_AT	1752.1	ENSG00000157193	LRP8	LDL receptor related protein 8 [Source:HGNC Symbol;Acc:HGNC:6700]	AFFY_PRIMEVIEW
1753	11728897_X_AT	1753.1	ENSG00000269190	FBXO17	F-box protein 17 [Source:HGNC Symbol;Acc:HGNC:18754]	AFFY_PRIMEVIEW
1754	11728902_A_AT	1754.1	ENSG00000134030	CTIF	cap binding complex dependent translation initiation factor [Source:HGNC Symbol;Acc:HGNC:23925]	AFFY_PRIMEVIEW
1755	11728903_A_AT	1755.1	ENSG00000134030	CTIF	cap binding complex dependent translation initiation factor [Source:HGNC Symbol;Acc:HGNC:23925]	AFFY_PRIMEVIEW
1756	11728915_AT	1756.1	ENSG00000100106	TRIOBP	TRIO and F-actin binding protein [Source:HGNC Symbol;Acc:HGNC:17009]	AFFY_PRIMEVIEW
1757	11728919_A_AT	1757.1	ENSG00000204052	LRRC73	leucine rich repeat containing 73 [Source:HGNC Symbol;Acc:HGNC:21375]	AFFY_PRIMEVIEW
1758	11728926_AT	1758.1	ENSG00000235568	NFAM1	NFAT activating protein with ITAM motif 1 [Source:HGNC Symbol;Acc:HGNC:29872]	AFFY_PRIMEVIEW
1759	11728946_X_AT	1759.1	ENSG00000179348	GATA2	GATA binding protein 2 [Source:HGNC Symbol;Acc:HGNC:4171]	AFFY_PRIMEVIEW
1760	11728955_A_AT	1760.1	ENSG00000049130	KITLG	KIT ligand [Source:HGNC Symbol;Acc:HGNC:6343]	AFFY_PRIMEVIEW
1761	11728965_A_AT	1761.1	ENSG00000204604	ZNF468	zinc finger protein 468 [Source:HGNC Symbol;Acc:HGNC:33105]	AFFY_PRIMEVIEW
1762	11728972_A_AT	1762.1	ENSG00000149177	PTPRJ	protein tyrosine phosphatase, receptor type J [Source:HGNC Symbol;Acc:HGNC:9673]	AFFY_PRIMEVIEW
1763	11728974_A_AT	1763.1	ENSG00000119640	ACYP1	acylphosphatase 1 [Source:HGNC Symbol;Acc:HGNC:179]	AFFY_PRIMEVIEW
1764	11728978_X_AT	1764.1	ENSG00000064012	CASP8	caspase 8 [Source:HGNC Symbol;Acc:HGNC:1509]	AFFY_PRIMEVIEW
1765	11728990_A_AT	1765.1	ENSG00000141552	ANAPC11	anaphase promoting complex subunit 11 [Source:HGNC Symbol;Acc:HGNC:14452]	AFFY_PRIMEVIEW
1766	11728994_A_AT	1766.1	ENSG00000163512	AZI2	5-azacytidine induced 2 [Source:HGNC Symbol;Acc:HGNC:24002]	AFFY_PRIMEVIEW
1767	11728996_AT	1767.1	ENSG00000111262	KCNA1	potassium voltage-gated channel subfamily A member 1 [Source:HGNC Symbol;Acc:HGNC:6218]	AFFY_PRIMEVIEW
1768	11728997_AT	1768.1	ENSG00000183856	IQGAP3	IQ motif containing GTPase activating protein 3 [Source:HGNC Symbol;Acc:HGNC:20669]	AFFY_PRIMEVIEW
1769	11729008_AT	1769.1	ENSG00000145949	MYLK4	myosin light chain kinase family member 4 [Source:HGNC Symbol;Acc:HGNC:27972]	AFFY_PRIMEVIEW
1770	11729009_AT	1770.1	ENSG00000145949	MYLK4	myosin light chain kinase family member 4 [Source:HGNC Symbol;Acc:HGNC:27972]	AFFY_PRIMEVIEW
1771	11729010_AT	1771.1	ENSG00000149654	CDH22	cadherin 22 [Source:HGNC Symbol;Acc:HGNC:13251]	AFFY_PRIMEVIEW
1772	11729014_AT	1772.1	ENSG00000198216	CACNA1E	calcium voltage-gated channel subunit alpha1 E [Source:HGNC Symbol;Acc:HGNC:1392]	AFFY_PRIMEVIEW
1773	11729026_A_AT	1773.1	ENSG00000168487	BMP1	bone morphogenetic protein 1 [Source:HGNC Symbol;Acc:HGNC:1067]	AFFY_PRIMEVIEW
1774	11729027_A_AT	1774.1	ENSG00000145428	RNF175	ring finger protein 175 [Source:HGNC Symbol;Acc:HGNC:27735]	AFFY_PRIMEVIEW
1775	11729030_A_AT	1775.1	ENSG00000272442	AL353588.1	N/A	AFFY_PRIMEVIEW
1775	11729030_A_AT	1775.2	ENSG00000249481	SPATS1	spermatogenesis associated serine rich 1 [Source:HGNC Symbol;Acc:HGNC:22957]	AFFY_PRIMEVIEW
1776	11729040_AT	1776.1	ENSG00000225614	ZNF469	zinc finger protein 469 [Source:HGNC Symbol;Acc:HGNC:23216]	AFFY_PRIMEVIEW
1777	11729041_A_AT	1777.1	ENSG00000008226	DLEC1	deleted in lung and esophageal cancer 1 [Source:HGNC Symbol;Acc:HGNC:2899]	AFFY_PRIMEVIEW
1778	11729042_A_AT	1778.1	ENSG00000008226	DLEC1	deleted in lung and esophageal cancer 1 [Source:HGNC Symbol;Acc:HGNC:2899]	AFFY_PRIMEVIEW
1779	11729048_A_AT	1779.1	ENSG00000143412	ANXA9	annexin A9 [Source:HGNC Symbol;Acc:HGNC:547]	AFFY_PRIMEVIEW
1780	11729049_AT	1780.1	ENSG00000125255	SLC10A2	solute carrier family 10 member 2 [Source:HGNC Symbol;Acc:HGNC:10906]	AFFY_PRIMEVIEW
1781	11729051_A_AT	1781.1	ENSG00000110841	PPFIBP1	PPFIA binding protein 1 [Source:HGNC Symbol;Acc:HGNC:9249]	AFFY_PRIMEVIEW
1782	11729053_X_AT	1782.1	ENSG00000110841	PPFIBP1	PPFIA binding protein 1 [Source:HGNC Symbol;Acc:HGNC:9249]	AFFY_PRIMEVIEW
1783	11729060_A_AT	1783.1	ENSG00000039139	DNAH5	dynein axonemal heavy chain 5 [Source:HGNC Symbol;Acc:HGNC:2950]	AFFY_PRIMEVIEW
1784	11729069_A_AT	1784.1	ENSG00000167757	KLK11	kallikrein related peptidase 11 [Source:HGNC Symbol;Acc:HGNC:6359]	AFFY_PRIMEVIEW
1785	11729083_AT	1785.1	ENSG00000179855	GIPC3	GIPC PDZ domain containing family member 3 [Source:HGNC Symbol;Acc:HGNC:18183]	AFFY_PRIMEVIEW
1786	11729095_AT	1786.1	ENSG00000221852	KRTAP1-5	keratin associated protein 1-5 [Source:HGNC Symbol;Acc:HGNC:16777]	AFFY_PRIMEVIEW
1787	11729105_A_AT	1787.1	ENSG00000116983	HPCAL4	hippocalcin like 4 [Source:HGNC Symbol;Acc:HGNC:18212]	AFFY_PRIMEVIEW
1788	11729114_S_AT	1788.1	ENSG00000103035	PSMD7	proteasome 26S subunit, non-ATPase 7 [Source:HGNC Symbol;Acc:HGNC:9565]	AFFY_PRIMEVIEW
1789	11729116_AT	1789.1	ENSG00000126583	PRKCG	protein kinase C gamma [Source:HGNC Symbol;Acc:HGNC:9402]	AFFY_PRIMEVIEW
1790	11729117_A_AT	1790.1	ENSG00000126583	PRKCG	protein kinase C gamma [Source:HGNC Symbol;Acc:HGNC:9402]	AFFY_PRIMEVIEW
[truncated: 5,743 more rows]
